# A Sexual Bias in mitochondrial protein-coding gene expression across different tissues and the prognostic value in multiple cancers

Alan Tardin da Silva<sup>1</sup>, Cristina dos Santos Ferreira<sup>2</sup> and Enrique Medina-Acosta<sup>1\*</sup>

<sup>1</sup> Núcleo de Diagnóstico e Investigação Molecular, Laboratório de Biotecnologia, Universidade Estadual do Norte Fluminense, Campos dos Goytacazes, RJ, Brazil.

<sup>2</sup> Laboratório Nacional de Computação Científica, Petrópolis, RJ, Brazil.

**\* Correspondence:**

Enrique Medina-Acosta  
quique@uenf.br

**Keywords:** Mitochondrial protein-coding genes; Sexual Dimorphism; mtDNA Genes; Aging; Survival outcome;

**Abstract:** words

**Total number of words** (with citations):

**Number of figures in the main typescript:**

**Number of supplementary figures:**

**Supplementary data:**

## 28 ABSTRACT

29

30 Mitochondria in mammalian cells provide ATP through oxidative phosphorylation. The  
31 overproduction of reactive oxygen species (ROS) in mitochondrial cells promotes cancer by modifying  
32 gene expression or function. Mating introduces competing mitochondrial (mtDNA) and nuclear DNA  
33 (nDNA) gene products, leading to biological differences between males and females for diseases and  
34 disorders such as cancer. There is a significant sex bias in aging-related conditions. We aimed to  
35 investigate whether sex and age affect mitochondrial protein-coding gene expression in cancer and, if  
36 so, to determine the prognosis value in survival outcomes, stemness, and immune cell infiltrates. We  
37 compared normal versus primary tumor transcriptomes (bulk RNA-Seq) from The Cancer Genome  
38 Atlas (TCGA), and the Genotype-Tissue Expression (GTEx) projects to test these hypotheses.  
39 Correlations between gene expression, survival, protective or risk factor, stemness, and immune cell  
40 infiltrate were performed in RStudio using UCSC Xena Shiny. Eleven mitochondrial protein-coding  
41 genes were altered in brain cancer (*MT-ND2*, *MT-ND1*, *MT-ATP8*, *MT-ATP6*, *MT-CO2*, *MT-CYB*, *MT-*  
42 *CO3*, *MT-ND4L*, *MT-ND4*, *MT-ND3*, *MT-CO1*). *MT-ND5* and *MT-ND6* are disproportionately  
43 expressed in female brain tissues. Mitochondrial global polymorphic expression sites of variation were  
44 more significant in the 50-59 and 60-79-year-old age groups than in the 20-49-year-old age groups.  
45 Pan-cancer survival analysis revealed a 4-component gene signature (*MT-CO1*, *MT-CO2*, *MT-ND5*,  
46 *and MT-ND6*) downregulated in low-grade glioma (LGG). This gene signature increased LGG overall  
47 survival, disease-specific survival, and progression-free interval without sex-specific association.  
48 However, the correlation with disease-free interval survival was female-specific. The 4-component  
49 gene signature was protective in LGG but risky in thymoma cancer and uterine corpus endometrial  
50 carcinoma. In LGG, the 4-component gene signature positively correlated with immune monocyte,  
51 NK, and B cell infiltrates and negatively correlated with T cell CD4+ Th2, macrophage M1 and M2,  
52 myeloid dendritic cell, and neutrophil. We identified a 13-component mitochondrial protein-coding  
53 gene signature associated with stemness in kidney chromophobe. A sex-biased effect was observed in  
54 mitochondrial protein-coding for brain tissues, with a female bias. However, an aging effect with higher  
55 polymorphic site expression was observed in male tissues. We conclude that the differentially  
56 expressed mitochondrial protein-coding genes provide new insights into carcinogenesis, helping to  
57 identify new prognostic markers. The overexpression of the 4-component gene signature is associated  
58 with a better prognosis in LGG, with positive and negative correlations with immune cell infiltrates.

59

60 **Keywords:** Mitochondrial protein-coding genes; Sexual Dimorphism; mtDNA Genes; Aging;  
61 Survival outcome;

62

63

64

## 65 INTRODUCTION

66  
67 The mammalian mitochondrial DNA (mtDNA) encodes 13 key proteins essential for the functioning  
68 of the oxidative phosphorylation system (OXPHOS) (Larsson NG, 1998; Foster et al., 2006; Gustafsson  
69 et al., 2016). The mitochondria are therefore considered a vital component of all cells with a nucleus,  
70 so mtDNA-associated disorders or diseases can affect many tissues, and clinical features are variable.  
71 Moreover, defects in mitochondrial metabolism cause a wide range of human diseases, such as cancer,  
72 which include examples from all medical fields. Thus, mtDNA disorders are associated with a range  
73 of multi-systemic diseases in humans, where the understanding of the spectrum of these diseases has  
74 been expanded by the recognition of mutations in protein-coding genes in mitochondria caused by  
75 reactive oxygen species (ROS), which cause not only several neurodegenerative diseases but also other  
76 disorders as cancer (Harman, 1992b; Wallace, 1992; Geromel et al., 2001; Taylor and Turnbull,  
77 2005; Schapira, 2006). Studies in the last ten years have shown that the human mtDNA of 13 protein-  
78 coding acts in several more functions than was described (Faure et al., 2011; Lee et al., 2013; Breton et  
79 al., 2014; Capt et al., 2016). Thus, investigating these genes' expression using RNA-Seq experiments is  
80 very useful in understanding the dynamics of expression in a population. It is also known that an RNA-  
81 Seq analysis allows the identification of gene expression signatures, which can be altered by external  
82 factors such as the environment, health status, or disease (da Silva Francisco Junior et al., 2019).

83  
84 Using RNA-Seq analysis to investigate the extent of allelic specific expression (ASE) becomes a  
85 challenging task for mitochondrial protein-coding genes, because mitochondria have a haploid  
86 genome, and it is not possible to perform a genome-wide ASE, only for the detection of  
87 microheteroplasmy. Since microheteroplasmy is a form of heteroplasmy, this would also damage the  
88 mtDNA, but the levels of microheteroplasmy are about 2–5% in mitochondrial genomes. Moreover,  
89 the microheteroplasmy and heteroplasmy are present in mitochondrial diseases but also in normal  
90 individuals, where heteroplasmic variants without apparent functional consequences are observed in  
91 samples from individuals without any overt mitochondrial disease (Calloway et al., 2000; Kirches et  
92 al., 2001; Santos et al., 2008; He et al., 2010). Furthermore, there is a variation in pattern expression  
93 between mtDNA and the nuclear DNA variants. Consequently, calculating the ASE for mitochondrial  
94 protein-coding genes involves using a different methodology to calculate this specific expression in a  
95 population (Gemmell et al., 2004; Kassam et al., 2016; da Silva Francisco Junior et al., 2019; Stenton  
96 and Prokisch, 2020; Stewart and Chinnery, 2021).

97  
98 The mtDNA is in the mitochondrial matrix and is closed to the respiratory chains, which are the primary  
99 source of ROS from the OXPHOS system. ROS induce somatic mutations in mtDNA due to the lack  
100 of protection by histones (Richter, 1995; Shokolenko et al., 2009). Thus, cumulative mutations in  
101 mtDNA can result in dysfunction of the OXPHOS system, leading to diseases associated with  
102 mitochondria, which is a hallmark of many diseases, such as cancer (van Oven and Kayser,  
103 2009; Srinivasan et al., 2017). Additionally, the mitochondria are both producers and targets of  
104 oxidative stress induced by exposure to ROS, resulting in mitochondrial dysfunction and interfering in  
105 electron transfer activity in oxidative phosphorylation. Defects in electron transfer activity increase  
106 ROS production, thus establishing a “vicious cycle” with aging that interferes with production and  
107 target properties (Miquel et al., 1980; Linnane AW, 1989; Papa, 1996; Ozawa, 1997).

108  
109 Aging is a universal process whose manifestations are familiar and unmistakable, and old age in  
110 humans and even animals can be readily recognized after a minimal assessment. Despite this, an  
111 accepted definition of aging and a detailed understanding of the biological mechanisms underpinning  
112 aging are elusive. So, aging is described as the progressive loss of function accompanied by decreased

113 fertility and increased mortality and disability (Kirkwood, 2000). Thus, aging is associated with  
114 evidence of deleterious changes in the molecular structure of DNA, proteins, lipids, and prostaglandins,  
115 all markers of oxidative stress (Harman, 1992a;1993). It has been recognized that ROS also play a role  
116 in normal signaling processes and that their generation is essential for maintaining homeostasis and  
117 cellular responsiveness (Droge, 2002). Since mitochondria are involved in oxidative stress, a  
118 mitochondrial theory of aging has been proposed, where an accumulation of somatic mutations in  
119 mtDNA induced by exposure to ROS leads to errors in the mtDNA-encoded polypeptides, affecting  
120 the electron transfer and oxidative phosphorylation system (Miquel et al., 1980;Linnane AW, 1989).  
121 Declines in the activity of the mitochondrial respiratory system and its constituent enzymes have been  
122 reported with advancing age, notably in cytochrome c oxidase, in several tissues, including skeletal  
123 muscle, heart, and liver (Muller-Hocker, 1989). Thus, the integrity of mitochondrial DNA in these  
124 tissues is gradually reduced with age, evidenced by the accumulation of deletions, duplications, and  
125 some point mutations in the mtDNA (Nagley and Wei, 1998;Kopsidas et al., 2002).

126  
127 Having this perspective on the mammalian mtDNA, which encodes 13 proteins essential for the  
128 functioning of other systems, like the OXPHOS system, we considered building a computational meta-  
129 analysis of the mitochondrial protein-coding genes to investigate the existence of differentially  
130 expressed genes (DEG) in healthy tissues versus cancer tissues. We also consider exploring differences  
131 in the expression of these 13 genes in different tissues, at different age groups, and between sexes  
132 (females and males). In the same way, a possible punctual polymorphic point of variable expression of  
133 these genes was also investigated. This study approach explores the possibility of sex bias in the  
134 expression of the mitochondrial protein-coding gene expression and the impact on survival outcomes  
135 in several cancers. Thus, we hypothesize that a sex-bias expression of the 13 mitochondrial protein-  
136 coding genes may exist across different tissues and in the survival outcomes. Additionally, we  
137 hypothesize that the polymorphic site expression in mitochondria protein-coding genes may differ  
138 between the sexes at different age groups impacting pathologies such as cancer.



139  
140  
141  
142  
143  
144  
145  
146  
147  
148  
149  
150  
151  
152  
153  
154  
155  
156  
157  
158  
159  
160  
161  
162  
163  
164  
165  
166  
167  
168  
169  
170  
171  
172  
173  
174  
175  
176  
177  
178  
179  
180  
181  
182  
183  
184

## **MATERIAL AND METHODS**

### **Analysis of Differential Expression of Mitochondrial Protein-Coding Genes in Different Tissues**

We used 19,131 RNA-Seq experiments samples from 18,972 donors (8516 Female and 10456 Male) from The Genotype-Tissue Expression (GTEx) for 52 non-diseased tissue sites across nearly 1000 individuals and The Cancer Genome Atlas (TCGA) for over 20,000 primary cancer and matched samples from healthy subjects spanning 33 cancer types, to search for a differential expressed genes (DEG). We used the UCSC Xena browser (<https://xena.ucsc.edu/>) to construct the base of this analysis and selected the TCGA TARGET GTEx cohort study and the phenotypic variables primary\_site, study, sample type, main category, and gender as our first variable to organize our data based on these features. Posteriorly, we selected our second variable, genomic, using the mitochondrial protein-coding genes as input. Here, we used a gene expression RNA-Seq - RSEM norm\_count, to access the expression of the 13 mitochondrial protein-coding genes. The RSEM was used because it relates to gene abundances from single-end or paired-end RNA-Seq data; therefore, RSEM outputs abundance estimates, 95% credibility intervals, and visualization files and can also simulate RNA-Seq data. After, we analyzed the DEG sets (above 1.5 and below -1.5 log<sub>2</sub>Fold Change, FDR < 0.05) of each primary health tissue compared to the same tissue in cancer (the primary tumor) to search if there is a tissue with DEG in health samples against tumor samples. We used the pipeline from the Ma'ayan lab's Apyter bulk RNA-Seq analysis and included the L1000FWD analysis, Limma-Voom Differential Gene Expression. All this analyzed data was downloaded from the UCSC Xena browser and taken to RStudio to organize the data.

### **Selection of Mitochondrial Protein-Coding Genes and Polymorphic sites**

The mitochondrial protein-coding genes used in this analysis were those already described in the literature and validated by MITOMAP, a human mitochondrial genome database used as a reference for mitochondrial analysis (Table S1), and by NCBI genes. Data collection was performed through the RStudio interface, R programming language (<https://cran.r-project.org/>), using the data packages from the “BiomaRt”, “Bioconductor,” and “BSgenome” libraries to filter the desired information. The analysis involved extracting the physical positions of the 13 mitochondrial protein-coding genes and global polymorphic sites in the population contained within the genes. For this analysis, we used the UCSC Genome Browser of Santa Cruz, a public repository of databases, to construct a custom track with information on the physical positions of genes and polymorphic sites in the mitochondrial genome. The version genome used was the GRCh38/hg38 because it is the only one with data about genes and global polymorphic sites mapped in a population for the mitochondrial genome. We performed a computational meta-analysis to determine the physical position of each mitochondrial protein-coding gene and the global polymorphic sites (in bp). After, we search for polymorphic sites in UCSC genome browser Data base SNPs (dbSNPs151) to construct a site-specific expression based on polymorphic sites of variation already known by the dbSNPs151. This data was downloaded, and this information was integrated into the RStudio environment.

## 185 **Expression Analysis of Mitochondrial Protein-Coding Genes and Polymorphic** 186 **sites**

187 For the analysis of polymorphic site expression at the mitochondrial protein-coding genes, a data  
188 collection was built based on the physical positions of the mitochondrial genome, using samples from  
189 public repositories of databases, such as UCSC (<https://genome.ucsc.edu/>). UCSC is an online genome  
190 browser with an extensive collection of assemblies and annotations of data about various model  
191 organisms, along with a large set of tools for visualizing, analyzing, and downloading data. In this  
192 Browser, we work with the GRCh38/hg38 genome version. We accessed the clade option, for Mammal  
193 and the genome option, for Human. We selected the group option to access GTEx RNA-Seq Signal  
194 Hub, where we extract normalized transcript expression levels (RPKM - Reads Per Kilobase of  
195 transcript, per Million mapped reads). Using the RPKM levels, we perform an intersection of these  
196 expression data with a custom track, previously obtained, containing the physical position of the  
197 polymorphic sites and the 13 mitochondrial protein-coding genes. Lastly, using the table option, we  
198 cross all this information with each patient's sample available in all 52 tissues (Table S2), going to the  
199 option output format where data points were selected. The Signal hub data were also separated  
200 according to other criteria, such as age groups, in 20-49 years, 50-59 years, and 60-79 years, by sex,  
201 male and female.

202 After obtaining this data collection, some packages were used in RStudio, such as stringr, plyr,  
203 rtracklayer, BSgenome, and XML, to perform another computational meta-analysis filtering the  
204 mitochondrial protein-coding genes polymorphic sites. These points were correlated by their physical  
205 positions within the protein-coding mitochondrial genes to use these polymorphic points as a filter to  
206 obtain the RPKM of each patient sample that crossed the physical position of these points. We averaged  
207 the expression of each signal hub in all tissues based on the physical position of the polymorphic sites  
208 so that only the signal hubs contained within the physical position were selected. The final data set was  
209 separated into two categories based on sex (Female or Male); and based on age, with three great groups,  
210 20-49 years, 50-59 years, and 60-79 years, also considering the sex (Female or Male). We estimate the  
211 RPKM mean of the genes and the polymorphic sites in each tissue sample. We also performed the  
212 statistical Tukey test for multiple comparisons, using the mean expression of each gene or polymorphic  
213 sites in each tissue for the three ages to calculate the RPKM mean of each age group. The False  
214 Discovery Rate was also calculated to conceptualize multiple comparisons in the analyzed data.  
215 Therefore, the FDR tests using the Benjamini-Hochberg method had a cut-off of  $\leq 0.05$ . This analysis  
216 was performed for females and males separately.

## 217 218 **Pan-Cancer Survival Analysis of Mitochondrial Protein-Coding Genes**

219  
220 We used data from the GEPIA2 (<http://gepia2.cancer-pku.cn/#index>), a platform containing public data  
221 for interactive analysis of gene expression profiles in RNA-Seq samples from primary cancers from  
222 the TCGA (The Cancer Genome Atlas Program <https://www.cancer.gov/about-nci/organization/ccg/research/structural-genomics/tcga>), a reference cancer genomics program,  
223 covering 33 cancer types (Table S3), with a total of 9,736 samples. We also used data from samples  
224 from RNA-Seq experiments available in nontumor primary tissues from the Genotype-Tissue  
225 Expression (GTEx) project (8,587 samples) from 52 tissues (Table S2). A computational meta-analysis  
226 was performed to determine a pan-cancer overall survival map of the mitochondrial genes in 33 cancer  
227 types (Table S3). We set the following parameters: Survival Time Units: months, significance level:  
228 0.05, P-Value Adjustment: False Discovery Rate (FDR), group cutoff: median, cutoff-high: 50% used.  
229

230 We define gene signatures as the additive expression profiles of at least three genes exhibiting the  
231 prognostic value per tissue.  
232  
233

## 234 **Prognostic Factors of Pan-Cancer Survival Outcomes**

235 The prognostic factor values of the 13 mitochondrial protein-coding genes were estimated by the  
236 Kaplan-Meier method using a computational meta-analysis in RStudio, P (version 2022.02.3 build  
237 492 for Windows) (Allaire, 2012) using the UCSC Xena Shiny standalone application (WANG  
238 et al., 2021) (<http://xena.ucsc.edu/>). We queried the expression profiles of each gene using four  
239 methods of survival outcomes: overall survival (OS), disease-specific survival (DSS), disease-free  
240 interval survival (DFI), and progression-free interval (PFI). OS refers to the percentage of patients alive  
241 after cancer diagnosis throughout the study period. DSS describes the percentage of patients who have  
242 not died from a cancer type in a defined period, such as patients who died from causes other than the  
243 specific cancer type is not counted in this measurement. DFI is the length of time after primary  
244 treatment for cancer that the patient survives without any signs or symptoms of that cancer. PFI is the  
245 length of time, during and after the treatment of a cancer type, that a patient lives with the disease but  
246 does not worsen. We set the parameters s described in the prior session and did not categorize the  
247 patients by age. We also investigated whether there is a sex-specific effect on survival outcomes.

## 248 249 **Molecular Profile Analysis for Risk or Protective Effects in Different Cancers**

250 For this analysis, we used mRNA data expression for 33 different types of cancer available through the  
251 TCGA for all samples (Table S3). In this analysis, we constitute a gene signature that presents at least  
252 three genes per tissue. Essentially, a statistical regression model commonly used in medical research,  
253 the Cox model, was used to investigate the association between patient survival time and one or more  
254 predictor variables, in this case, the risk or protective effect. Therefore, the effect of covariates  
255 estimated by any proportional hazard model can be reported as a hazard ratio. In this way, we aim to  
256 identify whether the mitochondrial protein-coding genes have risk or protective effects based on OS  
257 (Overall Survivor) having an adjusted threshold of 0.5. We define genes as risky ( $\log(\text{Hazard Ratio})$   
258  $> 0$ ) or protective ( $\log(\text{Hazard Ratio}) < 0$ ), or NS (No statistical significance,  $P\text{-value} > 0.05$ )).

## 259 **Analysis of the association of the molecular profile to immune response signatures** 260 **and Stemness**

261  
262 Subsequently, we investigated the association between the molecular profile of mitochondrial protein-  
263 coding genes and stemness (the impact of a stem cell-like tumor phenotype). Here, we aim to obtain a  
264 possible relationship, positive (+1), negative (-1), or neutral (0), between gene signatures and Stemness  
265 in all available cancer types (Table S3). We also investigate the existence of a correlation between the  
266 mitochondrial protein-coding genes and the immune infiltrate signatures. In both analyses, genetic  
267 signatures presented at least three genes per tissue or at least three genes per tissue in each immune  
268 cell. For both analyses, we used mRNA expression data from patients of Pan-Cancer Atlas for 33  
269 different types of cancer. Spearman's test was performed to assess the correlation of the signatures,  
270 positive ( $\geq 0.50$ ) or negative ( $\leq -0.50$ ). We also filter this data considering its p-value, admitting only  
271 data with a p-value lower than 0.05.  
272

## 273 RESULTS

274

### 275 Differential Expression of Mitochondrial Protein-Coding Genes

276

277 We compared the RNA expression profiles of the 13 mitochondrial protein-coding genes in tumor  
 278 tissues from the TCGA project and matched (n=17) normal tissues from the GTEX project to identify  
 279 disease conditions in which the genes are differentially expressed. Eleven mitochondrial protein-coding  
 280 genes are DEG in brain tissue (*MT-ND2*, *MT-ND1*, *MT-ATP8*, *MT-ATP6*, *MT-CO2*, *MT-CYB*, *MT-*  
 281 *CO3*, *MT-ND4L*, *MT-ND4*, *MT-ND3*, *MT-CO1*) with LogFC  $\geq 1.5$  ( $p \leq 0.05$ ). We also noticed other  
 282 differentially expressed genes with LogFC  $\geq 1.5$  in tissues like the breast (*MT-ATP8*, *MT-ND1*, *MT-*  
 283 *ND2*, *MT-CYB*,  $p \leq 0.05$ ), liver (*MT-ND4*, *MT-ATP6*, *MT-ATP8*, *MT-ND4L*, *MT-CYB*, *MT-ND2*,  $p$   
 284  $\leq 0.05$ ), pancreas (*MT-ND2*,  $p \leq 0.05$ ) and testis (*MT-ND1*,  $p \leq 0.05$ ). We also observed a LogFC  $\leq -1.5$   
 285 in tissues such as peripheral blood (*MT-ND4*, *MT-ND5*, *MT-CO1*, *MT-ND4L*,  $p \leq 0.05$ ), ovary (*MT-*  
 286 *ND6*, *MT-ND1*, *MT-CO1*,  $p \leq 0.05$ ) and thyroid (*MT-ND6*,  $p \leq 0.05$ ) (Figure 1) (Table S4).  
 287

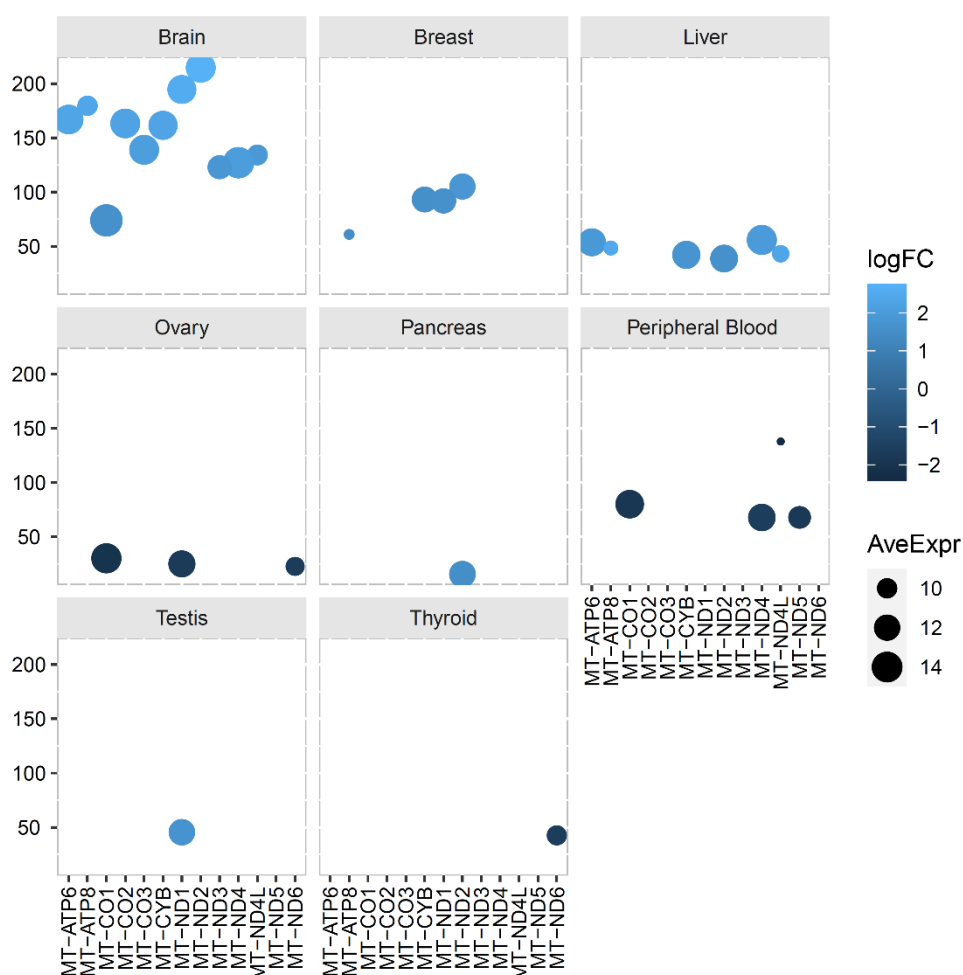

288

289 **Figure 1. Balloon plot of the differential expressed mitochondrial protein-coding genes in normal versus cancer**  
 290 **tissues.** Balloon size refers to the average expression (norm\_counts); blue color intensity refers to the Log2FC.  
 291 Overexpression (+); underexpression (-). X-axis: the 13 mitochondrial protein-coding genes; Y-axis, FDR (-log10). The  
 292 tissues are indicated in each box.

293

## 294 **In Silico Consolidation of the Mitochondrial Protein-Coding Genes and** 295 **Polymorphic sites**

296  
297 From the names of the mtDNA genes, their physical positions, and to which chain within the  
298 mitochondrial genome they belonged (H-heavy; L-light) were obtained, as well as the product of each  
299 gene. Subsequently, still using the physical positions of the mtDNA genes, 2297 polymorphic sites  
300 were obtained in the mitochondrial genome, of which only 1540 were within the 13 mitochondrial  
301 genes (MT-ND1 = 156, MT-ND2 = 126, MT-ND3 = 46, MT-ND4 = 157, MT-ND4L = 39, MT-ND5  
302 = 230, MT-ND6 = 81, MT-CO1 = 162, MT-CO2 = 82, MT-CO3 = 108, MT-CYB = 191, MT-ATP6  
303 = 112, MT-ATP8 = 37) (Figure S1).

## 304 305 **Expression Profile of Sex-specific Aging-related in Mitochondrial Protein-Coding** 306 **Genes and Polymorphic sites**

307  
308 We compared the expression profiles of the 13 mitochondrial protein-coding genes and polymorphic  
309 sites in males and females according to three age groups (20-49-year-old, 50-59-year-old, and 60-79-  
310 year-old) in 52 GTEx tissues. We used two query strategies: first, we used the physical coordinates of  
311 each gene to extract the normalized transcript expression levels (RPKM) as a metric of the abundance  
312 of each donor in the mitochondria genome, and second, we used the physical position of polymorphic  
313 sites in population from the dbSNP151 database to capture site-specific abundance. We observed sex-  
314 biased effects on expression profiles across different tissues.

315  
316 Eleven genes (*MT-ND6*, *MT-ND5*, *MT-ND4*, *MT-ND4L*, *MT-ND3*, *MT-ND2*, *MT-ND1*, *MT-CYB*,  
317 *MT-CO3*, *MT-CO1*, *MT-ATP6*; Tukey test,  $p \leq 0.05$ ) showed differences in expression profile of  
318 males in thirty-four tissues across different ages (Figure 2) (Table S5-S6). The most significant male-  
319 biased expression across different ages was noticed in *MT-ND5* for Artery – Aorta, Brain – Substantia  
320 Nigra, and Esophagus – Mucosa (Wilcox test,  $p \leq 0.001$ ) and in the *MT-ND6* for Brain – Hypothalamus  
321 and Kidney – Cortex (Wilcox test,  $p \leq 0.001$ ) (Table S5-S6). For females, ten genes (*MT-ND6*,  
322 *MT-ND5*, *MT-ND4*, *MT-ND2*, *MT-ND1*, *MT-CYB*, *MT-CO3*, *MT-CO1*, *MT-ATP8*, *MT-ATP6*;  
323 Tukey test,  $p \leq 0.05$ ) exhibited differences in expression profile for nineteen tissues across different ages  
324 (Figure 3) (Table S5-S6). The most significant female-biased expression across different ages was  
325 observed in *MT-ATP6*, *MT-ATP8*, and *MT-CO1* for Artery – Coronary, and in *MT-CO1*, *MT-CO3*, and  
326 *MT-CYB* for Adipose – Visceral (Omentum) (Wilcox test,  $p \leq 0.05$ ). We also noticed that *MT-ND2*  
327 exhibit a highly significant female-biased expression in Brain – Frontal Cortex (BA9) and Brain –  
328 Substantia Nigra across different ages (Wilcox test,  $p \leq 0.001$ ) and in *MT-ND1* only for Brain –  
329 Substantia Nigra (Wilcox test,  $p \leq 0.001$ ). Interestingly, the *MT-ND5* also exhibited a female-biased  
330 expression in Artery – Aorta, Brain – Frontal Cortex (BA9), and Colon – Transverse (Wilcox test,  $p$   
331  $\leq 0.001$ ) at different ages, and the same was noticed in *MT-ND6* for Brain – Frontal Cortex (BA9) and  
332 Brain – Substantia Nigra (Wilcox test,  $p \leq 0.001$ ) (Table S5-S6).

333  
334 Considering possible differences in expression between the 52 different tissues analyzed for the 13  
335 mitochondrial protein-coding genes in the three age groups, we observed sex-biased and age-group-  
336 dependent effects on expression profiles (Figure 4-6). In the 20-49-year-old group, thirty-four different  
337 tissues showed significantly different expression profiles for *MT-ATP6*, *MT-ATP8*, *MT-ND1*, *MT-*  
338 *ND2*, *MT-ND3*, *MT-ND4*, *MT-ND4L*, *MT-ND5*, *MT-ND6*, *MT-CYB*, *MT-CO1*, *MT-CO2*, *MT-CO3*  
339 (Wilcox test,  $p \leq 0.05$ ). In this age group, eight genes exhibited the most significant expression profiles  
340 in Artery - Coronary (*MT-ATP6*, *MT-ATP8*, *MT-CO1*, *MT-CO2*, *MT-ND1*, *MT-ND2*, *MT-ND4*, and  
341 *MT-ND5*; Wilcox test,  $p \leq 0.001$ ). For the 50-59-year-old group, we noticed nineteen different tissues



342 where 13 genes exhibited the same effect (Wilcox test,  $p \leq 0.05$ ). For this age group, the most significant  
 343 expression profile between the tissues occurred in *MT-CO3*, *MT-CYB*, and *MT-ND6* in Adipose –  
 344 Subcutaneous (Wilcox test,  $p \leq 0.001$ ); *MT-ATP6*, *MT-ATP8*, *MT-CO1*, *MT-CO3*, and *MT-ND5* in  
 345 Adipose – Visceral (Omentum) (Wilcox test,  $p \leq 0.001$ ); *MT-ATP6*, *MT-ATP8*, *MT-CO1*, *MT-CO2*, *MT-*  
 346 *ND1*, *MT-ND2*, *MT-ND5*, and *MT-ND6* in Brain – Cerebellar Hemisphere (Wilcox test,  $p \leq 0.001$ ); *MT-*  
 347 *CO1*, *MT-ND4*, *MT-ND4L*, and *MT-ND6* in Brain – Hippocampus (Wilcox test,  $p \leq 0.001$ ); *MT-ATP8*,  
 348 *MT-CO1*, *MT-CO3*, *MT-CYB*, *MT-ND4* and *MT-ND5* in Brain – Hypothalamus (Wilcox test,  $p \leq 0.001$ );  
 349 *MT-ND1*, *MT-ND4*, and *MT-ND6* in Brain – Nucleus accumbens (basal ganglia) (Wilcox test,  
 350  $p \leq 0.001$ ); *MT-ND1* in Brain – Substantia Nigra, (Wilcox test,  $p \leq 0.001$ ). The last age group, 60-79-  
 351 year-old, exhibited thirty-four tissues with differences in expression for the same 13 mitochondrial  
 352 protein-coding genes (Wilcox test,  $p \leq 0.05$ ). In this last age group, the most significant expression  
 353 profile between the tissues and the mitochondrial protein-coding genes happens in *MT-CO1*, *MT-CO3*,  
 354 *MT-CYB*, and *MT-ND5* in Adipose – Visceral (Omentum) (Wilcox test,  $p \leq 0.001$ ); *MT-ND4L* and *MT-*  
 355 *ND5* in Artery – Coronary (Wilcox test,  $p \leq 0.001$ ); *MT-ATP6*, *MT-ATP8*, *MT-CO1*, *MT-CO2*, *MT-ND1*,  
 356 *MT-ND2*, *MT-ND4*, *MT-ND4L*, *MT-ND5* and *MT-ND6* in Brain – Amygdala (Wilcox test,  $p \leq 0.01$ );  
 357 *MT-ND4* and *MT-ND5* in Brain – Putamen (basal ganglia) (Wilcox test,  $p \leq 0.05$ ); *MT-CO1*, *MT-CO3*,  
 358 *MT-ND4* and *MT-ND5* in Colon – Sigmoid (Wilcox test,  $p \leq 0.01$ ); *MT-ATP6*, *MT-ATP8*, *MT-CO1*, *MT-*  
 359 *ND1*, *MT-ND2*, *MT-ND4* and *MT-ND6* in Esophagus – Muscularis (Wilcox test,  $p \leq 0.01$ ); *MT-ND1*,  
 360 *MT-ND2*, *MT-ND5* and *MT-ND6* in Kidney – Cortex (Wilcox test,  $p \leq 0.05$ ); *MT-ATP8*, *MT-CO1*, *MT-*  
 361 *CO2*, *MT-CYB*, *MT-ND1*, *MT-ND3*, *MT-ND4*, *MT-ND5* and *MT-ND6* in Minor Salivary Gland  
 362 (Wilcox test,  $p \leq 0.001$ ); *MT-CO1*, *MT-ND1*, *MT-ND5* and *MT-ND6* in Small Intestine – Terminal Ileum  
 363 (Wilcox test,  $p \leq 0.01$ ); *MT-CYB*, *MT-ND4* and *MT-ND5* in Thyroid (Wilcox test,  $p \leq 0.01$ ).

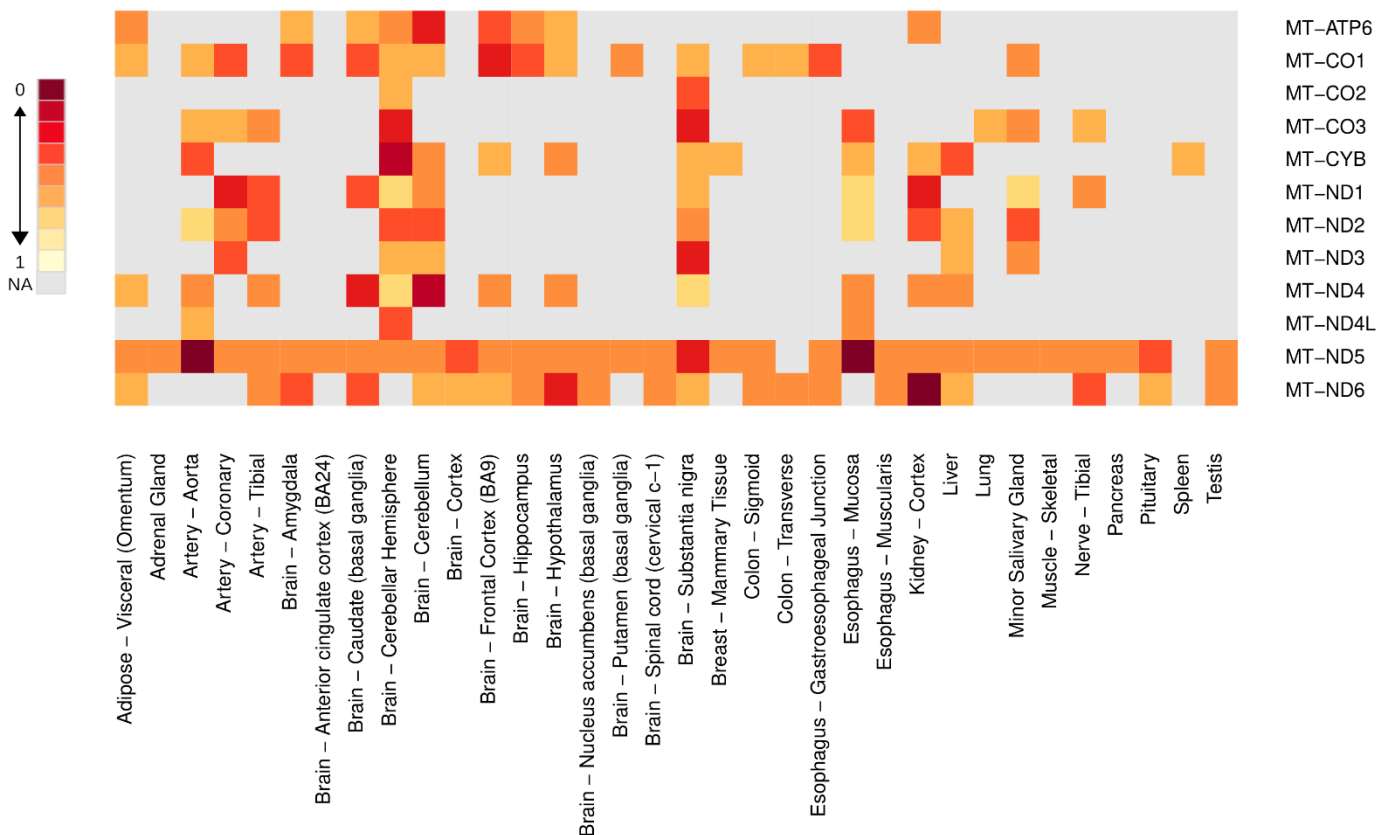

365 **Figure 2. Heatmap of significant mitochondrial protein-coding gene expression across different ages for each tissue**  
 366 **in males.** The expression of all mitochondrial protein-coding genes was measured using RPKM (reads per kilobase million),  
 367 and the color scale denotes the level of significance of gene expression in each tissue. The different ages consisted of three  
 368 groups (20-49 years; 50-59 years, and 60-79 years). The significance level was measured based on the Tukey test and the  
 369 FDR adjustment, Benjamin-Hochberg.

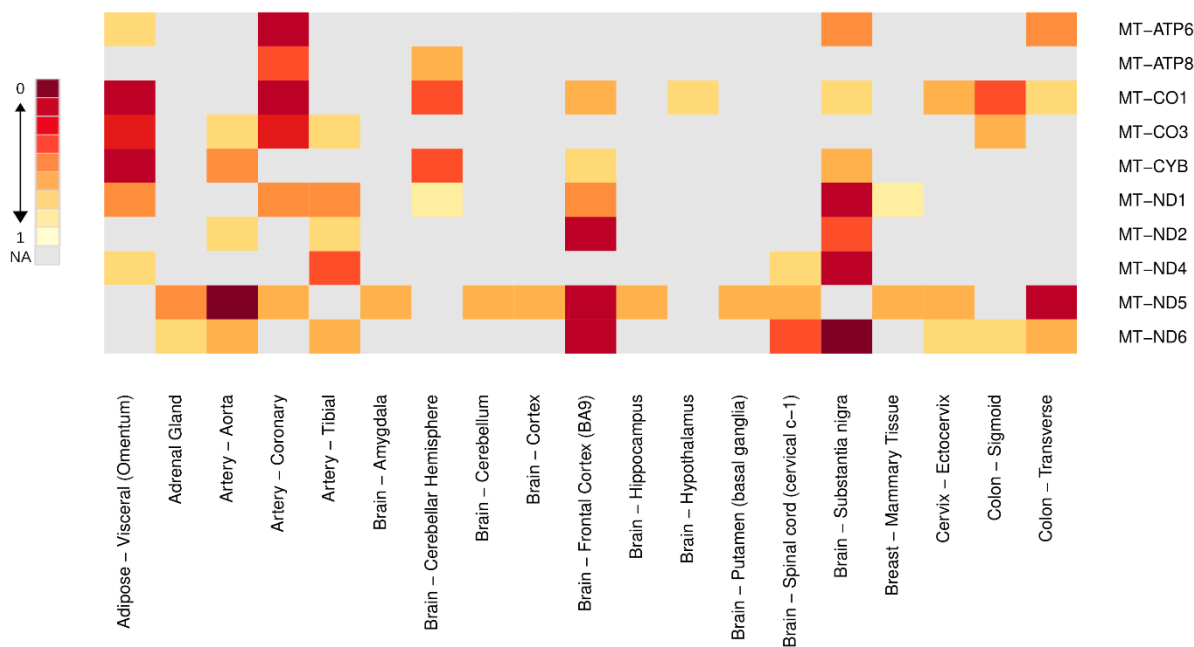

370 **Figure 3. Heatmap of significant mitochondrial protein-coding gene expression across different ages for each tissue**  
 371 **in females.** The expression of all mitochondrial protein-coding genes was measured using RPKM (reads per kilobase  
 372 million), and the color scale denotes the level of significance of gene expression in each tissue. The different ages consisted  
 373 of three groups (20-49 years; 50-59 years, and 60-79 years). The significance level was measured based on the Tukey test  
 374 and the FDR adjustment, Benjamin-Hochberg.  
 375  
 376

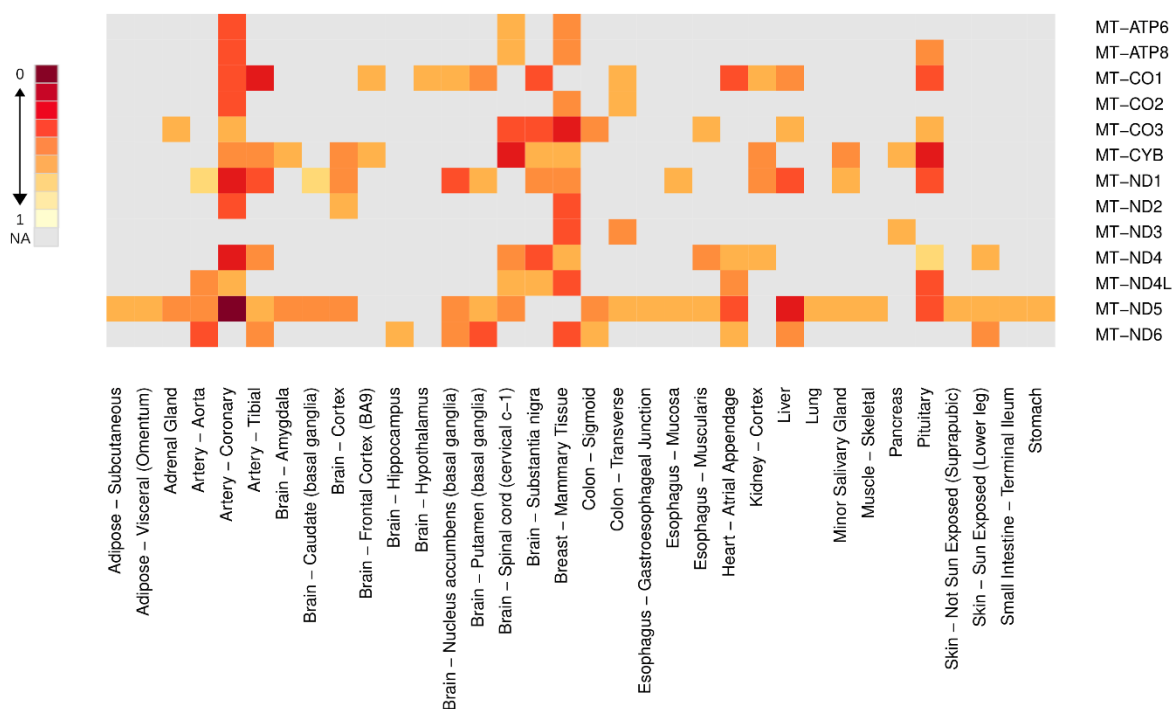

377  
378  
379 **Figure 4. Heatmap of significant mitochondrial protein-coding gene expression between sexes in 20-49-year-old**  
380 **group.** All mitochondrial protein-coding genes were measured between the sexes (female and male) using RPKM (reads  
381 per kilobase million) across different tissues, and the color scale denotes the level of significance of gene expression in  
382 each tissue. The sex-specific tissue samples were excluded, and the significance level was measured based on the Wilcoxon  
383 test and the FDR adjustment, Benjamin-Hochberg.  
384

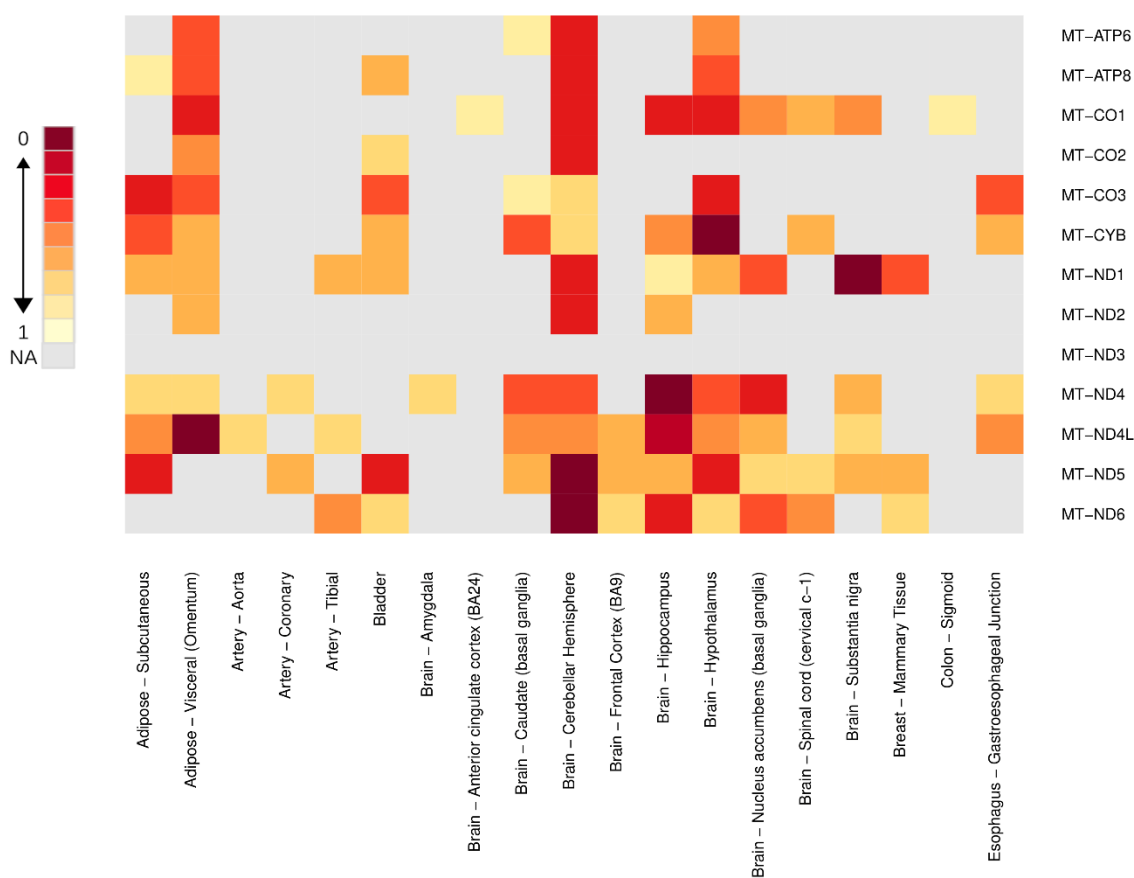

385  
 386 **Figure 5. Heatmap of significant mitochondrial protein-coding genes expression between sexes in 50-59-year-old**  
 387 **group.** All mitochondrial protein-coding genes were measured between the sexes (female and male) using RPKM (reads  
 388 per kilobase million) across different tissues, and the color scale denotes the level of significance of gene expression in  
 389 each tissue. The sex-specific tissue samples were excluded, and the significance level was measured based on the Wilcoxon  
 390 test and the FDR adjustment, Benjamin-Hochberg.  
 391

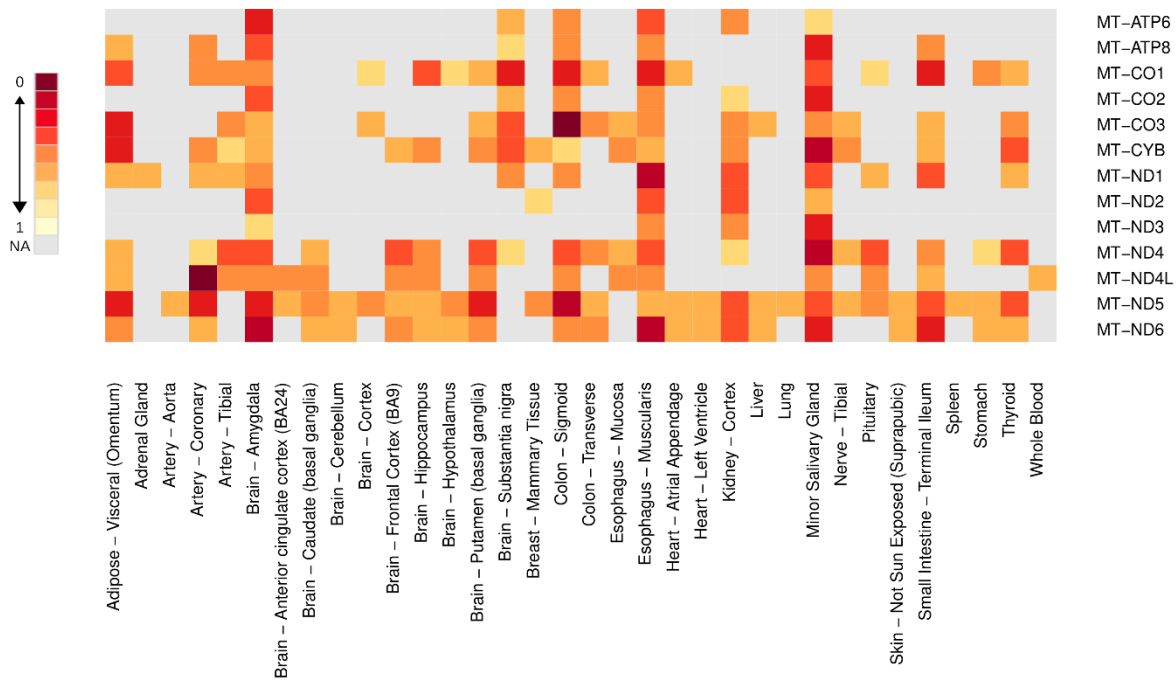

392  
 393 **Figure 6. Heatmap of significant mitochondrial protein-coding genes expression between sexes in 60-79-year-old**  
 394 **group.** All mitochondrial protein-coding genes were measured between the sexes (female and male) using RPKM (reads  
 395 per kilobase million) across different tissues, and the color scale denotes the level of significance of gene expression in  
 396 each tissue. The sex-specific tissue samples were excluded, and the significance level was measured based on the Wilcox  
 397 test and the FDR adjustment, Benjamin-Hochberg.

398  
 399  
 400 The polymorphic profile of the variation points in population for the 13 mitochondrial protein-coding  
 401 genes was clustering in 52 tissues from the GTEx project comprising three different ages (20-49-year-  
 402 old, 50-59-year-old, 60-79-year-old), which allowed building a landscape of these polymorphic sites  
 403 related to sexes (males and females) (Figure 7 and 8). This landscape will provide information about  
 404 the variation of polymorphic points along the transcripts and whether this variation is global or  
 405 sustained at all points in the population by using the RPKM transcript. We identify an age-group-  
 406 dependent sex-biased effect on the polymorphic sites in females in ten different tissues among the three  
 407 age groups (Adipose – visceral (Omentum), Adrenal Gland, Artery Coronary, Brain – Amygdala, Brain  
 408 – Frontal cortex (BA9), Brain – Hippocampus, Brain – Putamen (basal ganglia), Brain – Spinal cord  
 409 (cervical c-1), Brain – Substantia nigra, Breast – Mammary tissue, Cervix – Ectocervix; Tukey test,  $p$   
 410  $\leq 0.05$ ). In the same way, an age-male-biased of polymorphic sites was found in eight tissues (colon–  
 411 sigmoid, colon – transverse, esophagus – gastroesophageal junction, liver, lung, muscle-skeletal, nerve  
 412 tibial, prostate; Tukey test,  $p \leq 0.05$ ).

413

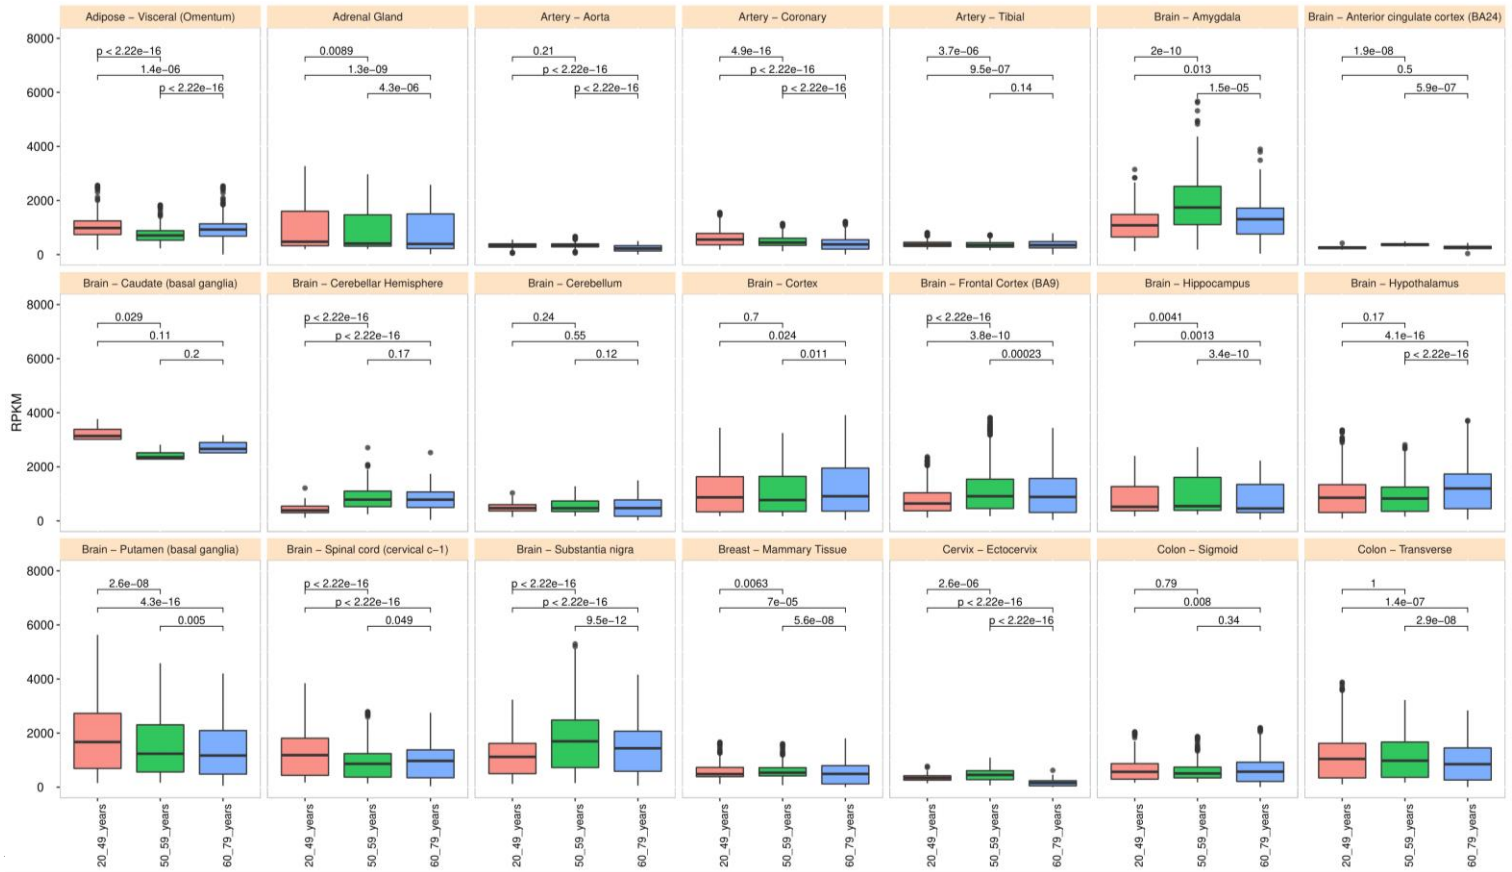

4

415

416

417

418

419

420

**Figure 7. Boxplot of mitochondrial polymorphic site expression in females across tissues at different age groups.** The polymorphic site expression at the mitochondrial protein-coding genes was measured using RPKM (reads per kilobase million) in three age groups, 20-49 years (red), 50-59 years (green), and 60-79 years (blue). The Tukey test and the FDR adjustment, Benjamini-Hochberg assessed significant differences between age groups.



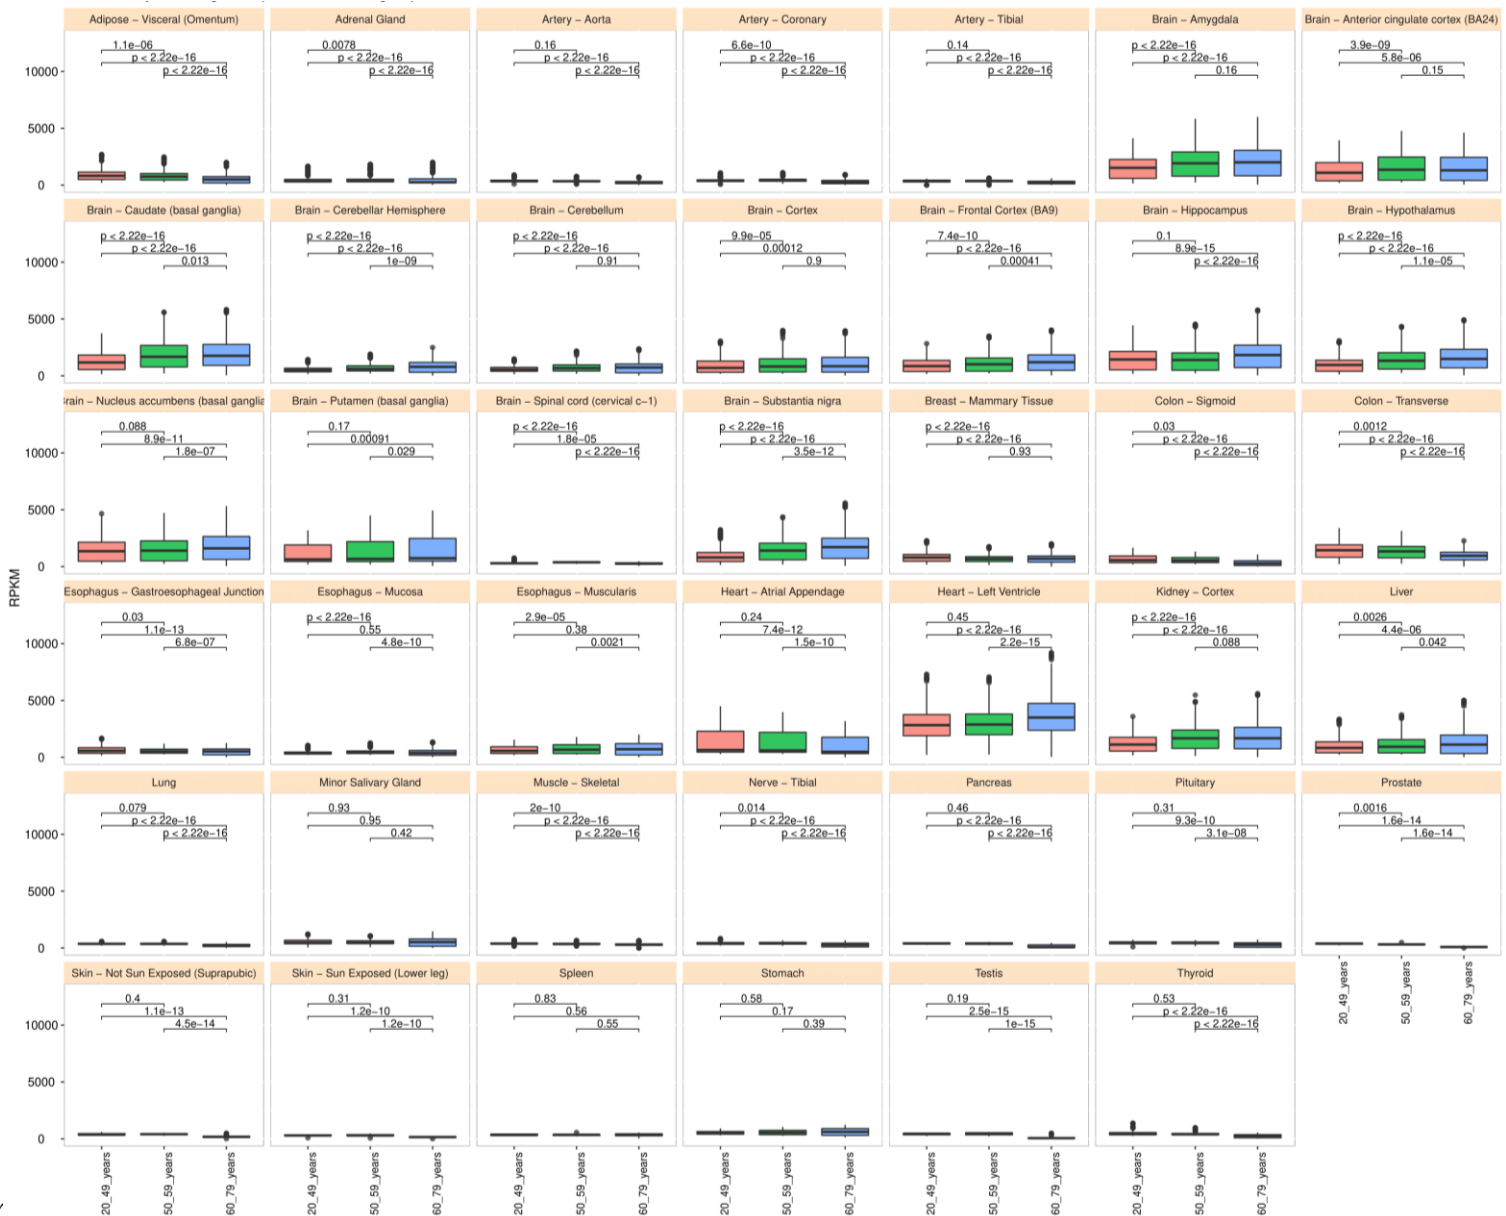

4:  
422 **Figure 8. Boxplot of mitochondrial polymorphic site expression in males across tissues at different age groups.** The  
423 polymorphic site expression at the mitochondrial protein-coding genes was measured using RPKM (reads per kilobase  
424 million) in three age groups, 20-49 years (red), 50-59 years (green), and 60-79 years (blue). The Tukey test and the FDR  
425 adjustment, Benjamini-Hochberg assessed significant differences between age groups.

426  
427 **Pan-Cancer Survival Map Analysis Based on the Expression Status of the 13**  
428 **Mitochondrial Protein-coding Genes**

429  
430 We estimated the overall survival outcome for each of the molecular expression profiles of the 13  
431 mitochondrial protein-coding genes in 33 cancer types to map the hazard risk based on the Cox  
432 proportional-hazards model for overexpression and under-expression patient groups. The under-  
433 expression of the *MT-CO1*, *MT-CO2*, *MT-ND5*, and *MT-ND6* genes is a hazard risk in lower-grade  
434 glioma (hazard ratio range 0.41-0.51, Logrank  $p \leq 0.00026$ ,  $p(\text{HR}) \leq 0.00033$ ), while the under-  
435 expression of the *MT-CO3* gene is a hazard risk in pancreatic adenocarcinoma (PAAD) (hazard ratio  
436 0.45,  $p(\text{HR})=0.00022$ , Log-rank  $p=0.00017$ ), Figure 9 (Table S10).

437

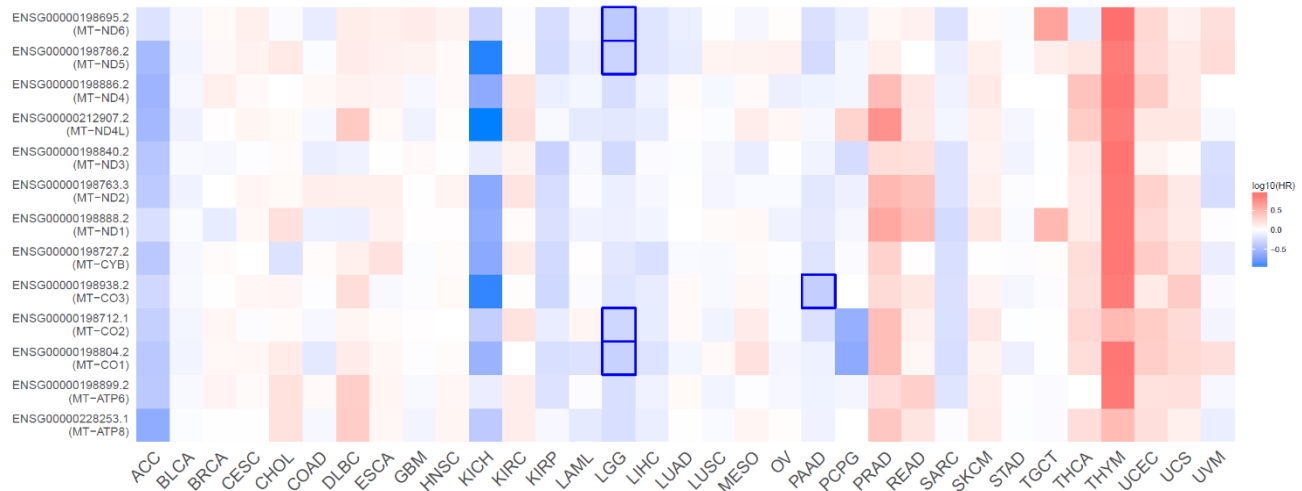

438

439

440

441

442

443

444

445

446

447

448

449

450

451

452

453

454

455

456

457

458

459

460

461

462

463

464

465

**Figure 9. Overall survival heatmap for the 13 mitochondrial protein-coding genes.** Squares denote overall survival associated with overexpression (red) or under-expression (blue). Highlighted frames indicate significant associations with overall survival outcomes based on hazard ratios (logarithmic scale  $\log_{10}$ ). Y-axis: mitochondrial genes (Ensemble transcripts and UCSCXena names), X-axis: pan-cancer types. The under-expression profiles of the *MT-CO1*, *MT-CO2*, *MT-ND5*, and *MT-ND6* genes have a significant overall survival risk in LGG (hazard ratio range 0.41-0.51, Logrank  $p \leq 0.00026$ ,  $p(\text{HR}) \leq 0.00033$ ), while the under-expression of the *MT-CO3* gene is a hazard risk in PAAD (hazard ratio 0.45,  $p(\text{HR})=0.00022$ , Logrank  $p=0.00017$ ).

## The 4-component gene signature is a Prognostic Factor of Survival Outcomes in LGG

We estimated the prognostic factor value of the 4-component gene signature (*MT-CO1*, *MT-CO2*, *MT-ND5*, and *MT-ND6*) by correlating the molecular expression profile with rates of survival outcomes in LGG patients ( $n=521$ ). We used four methods of survival outcomes: overall survival (OS) and disease-specific survival (DSS), disease-free interval (DFI), and progression-free-interval (PFI). Overexpression of the 4-component gene signature was significantly correlated with OS (Log-rank  $p < 0.0001$ ) (Figure 10, Table S11), DSS (Log-rank  $p < 0.0001$ ) (Figure 11, Table S12), and PFI (Log-rank  $p = 2e-04$ ) (Figure 12, Table S13). The favorable prognostic factor of the overexpression was not sex-specific since, in either males or females, the overexpression was significantly correlated with OS, DSS, and PFI (Log-rank  $p \leq 0.0076$ ) (Figure S2-S7; Tables S14-S19). However, for the DFI outcome, we observed a sex-specific association in that the downregulation of the 4-component gene signature in female patients exhibited a greater prognostic factor value (Log-rank  $p=0.019$ ) compared to males (Log-rank  $p=0.14$ ), Figure S8 and Figure S9 (Tables S20 and S21). There are no sufficient data ( $n \leq 10$  samples) about the clinical-pathologic stages (Stages I-IV) in LGG subjects. Therefore, we could not estimate the prognostic values with the clinical staging.

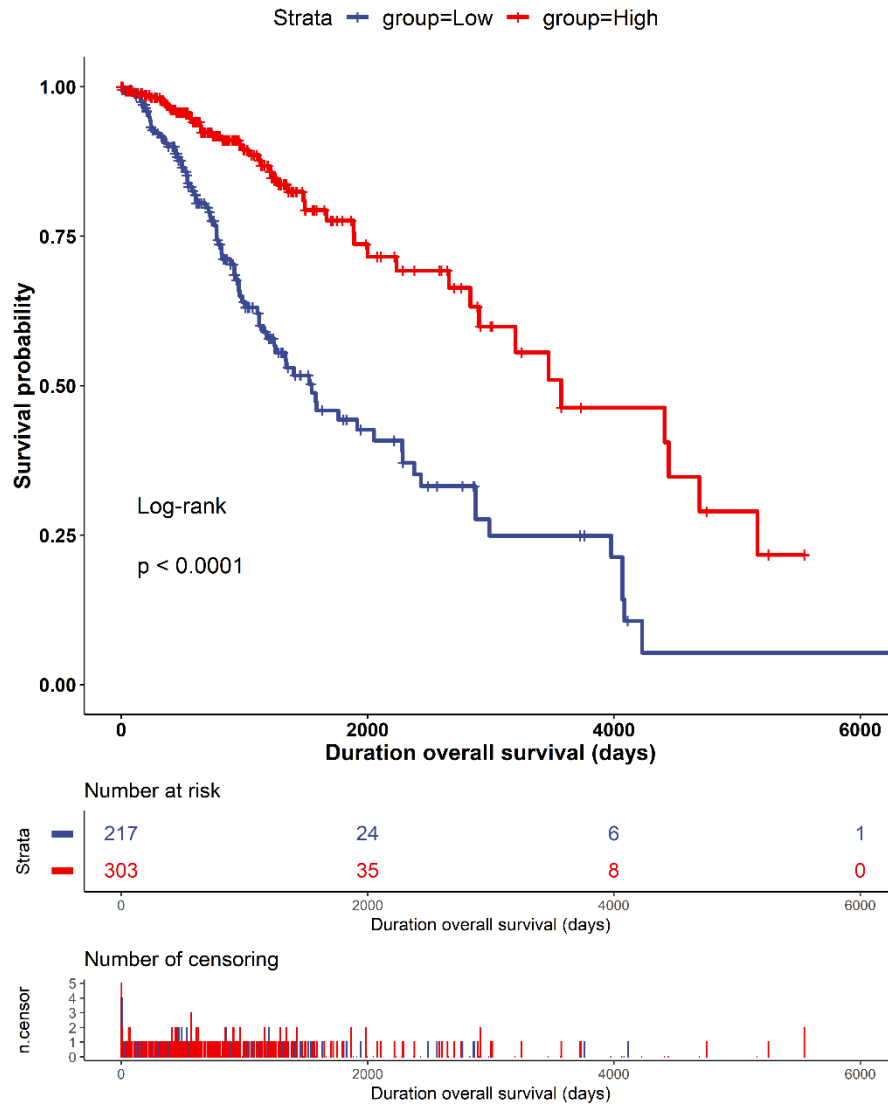

466  
467  
468  
469  
470  
471  
472

**Figure 10. Kaplan-Meier plot of overall survival outcome in low-grade glioma.** The curves denote the contribution of the 4-component gene signature (*MT-CO1*, *MT-CO2*, *MT-ND5*, *MT-ND6*) to the overall survival outcome in patients from the low (blue – downregulated) and high (red – upregulated) expression groups. The censoring number refers to patients who did not suffer the outcome of interest during the specified study period. The overexpression of the signature has a more significant prognostic factor value.

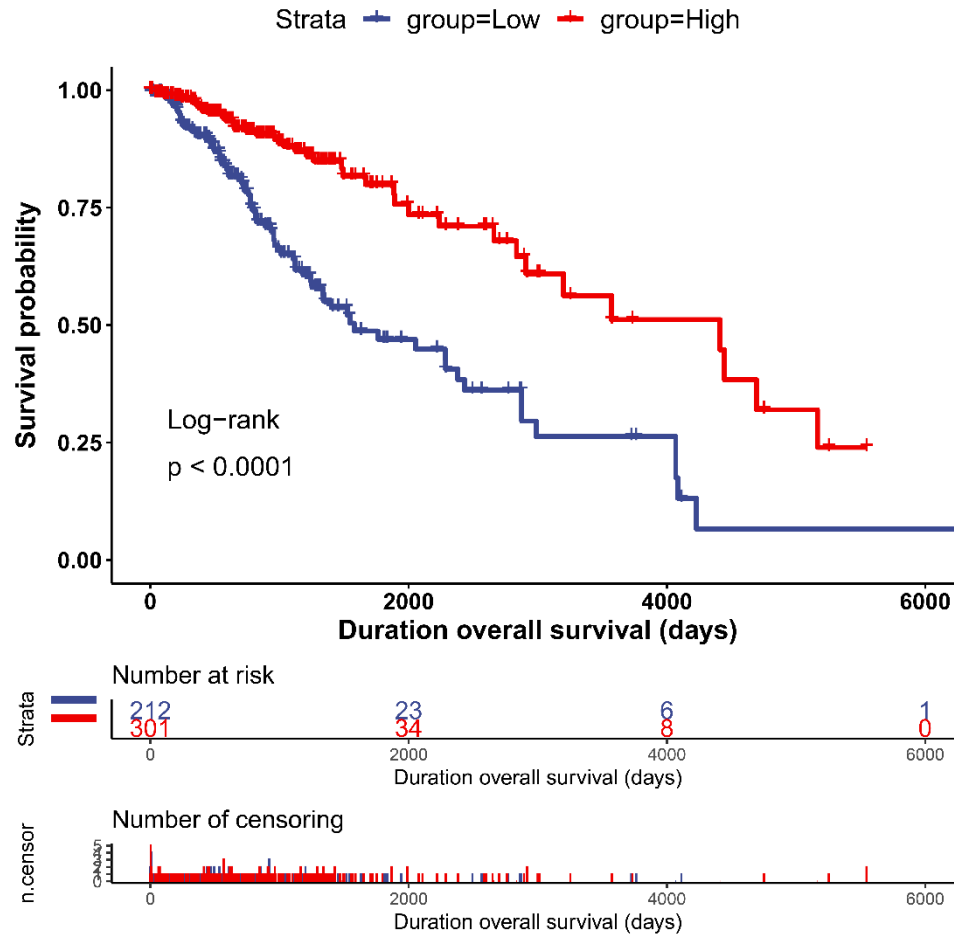

473  
474  
475  
476  
477  
478  
479  
480  
481

**Figure 11. Kaplan-Meier plot of disease-specific outcome in low-grade glioma.** The curves denote the contribution of the 4-component gene signature (*MT-CO1*, *MT-CO2*, *MT-ND5*, *MT-ND6*) to the disease-specific outcome in patients from the low (blue – downregulated) and high (red – upregulated) expression groups. The censoring number refers to patients who did not suffer the outcome of interest during the specified study period. The overexpression of the signature has a more significant prognostic factor value.

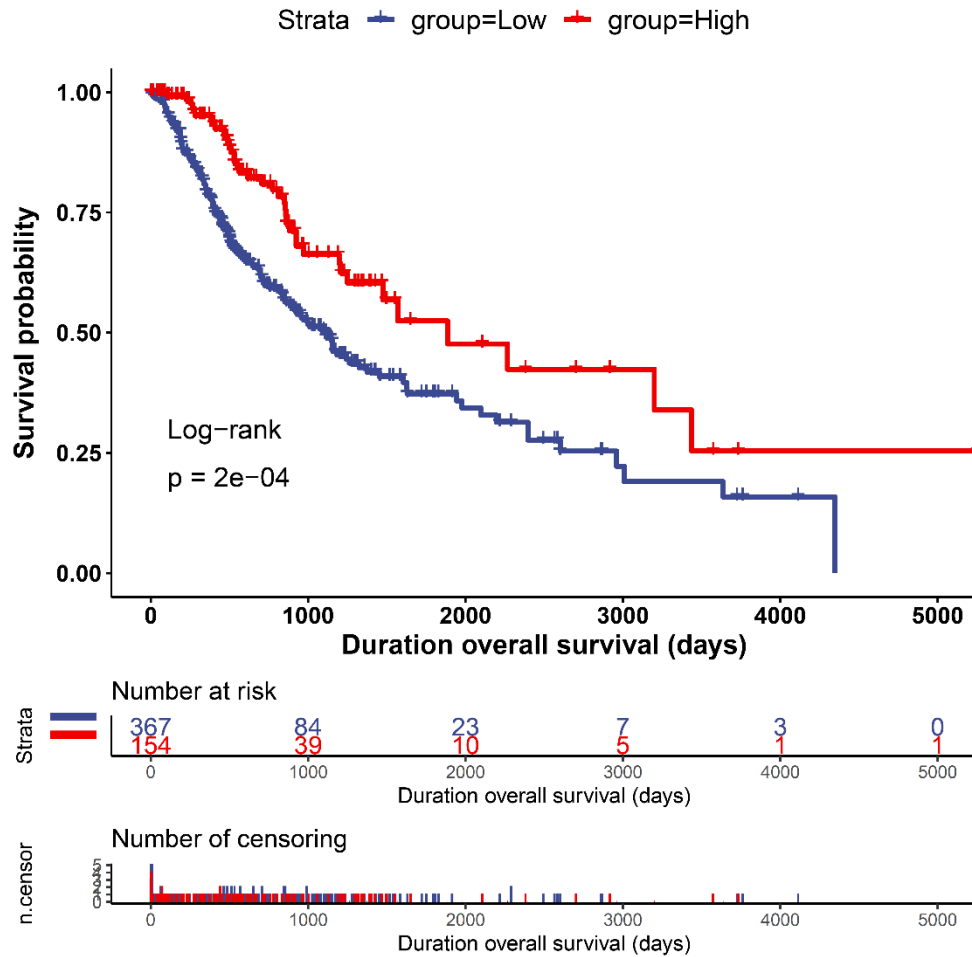

482  
483  
484  
485  
486  
487  
488  
489

**Figure 12. Kaplan-Meier plot of progression-free-interval outcome in low-grade glioma.** The curves denote the contribution of the 4-component gene signature (*MT-CO1*, *MT-CO2*, *MT-ND5*, *MT-ND6*) to the progression-free-interval outcome in patients from the low (blue – downregulated) and high (red – upregulated) expression groups. The censoring number refers to patients who did not suffer the outcome of interest during the specified study period. The overexpression of the signature has a more significant prognostic factor value.

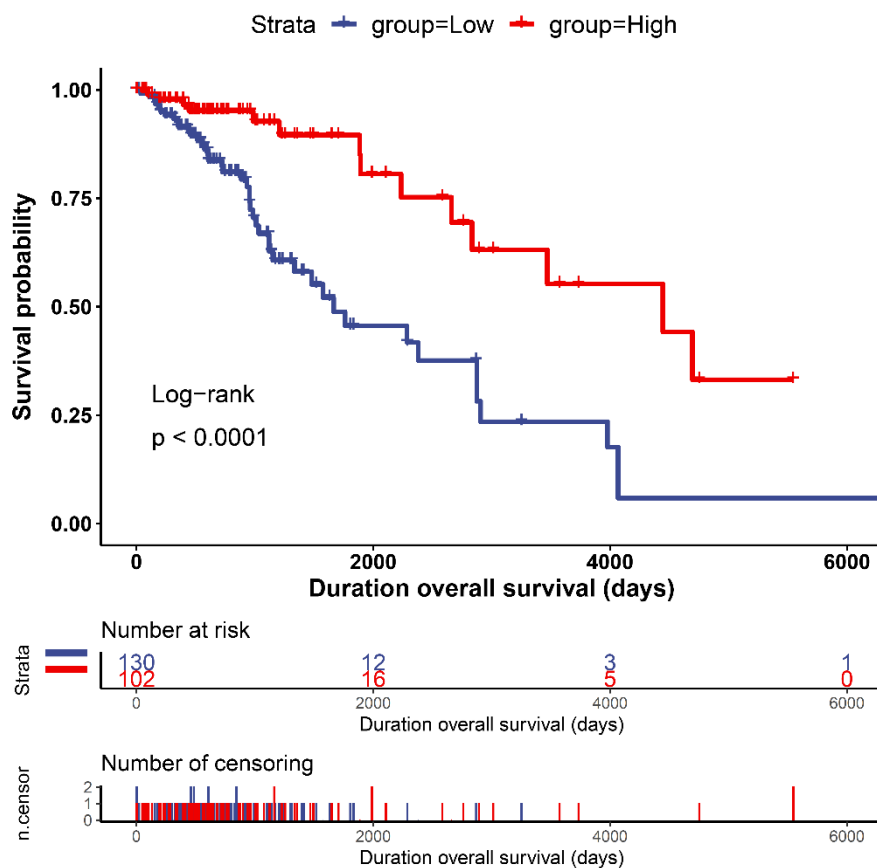

490  
491  
492  
493  
494  
495  
496

**Figure S2. Kaplan-Meier plot of overall survival outcome in low-grade glioma.** The curves denote the contribution of the 4-component gene signature (*MT-CO1*, *MT-CO2*, *MT-ND5*, *MT-ND6*), in females, to the overall survival outcome in patients from the low (blue – downregulated) and high (red – upregulated) expression groups. The censoring number refers to patients who did not suffer the outcome of interest during the specified study period. The overexpression of the signature has a more significant prognostic factor value.



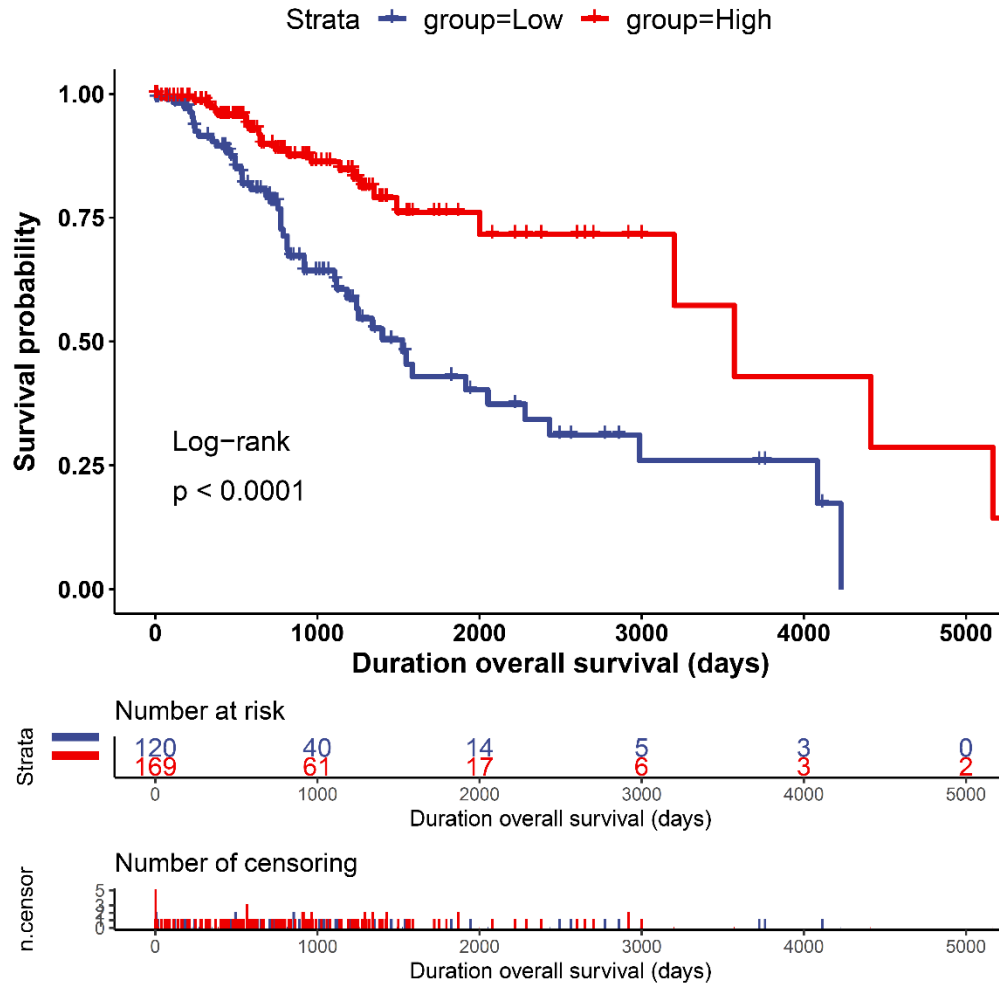

497  
498  
499  
500  
501  
502  
503

**Figure S3. Kaplan-Meier plot of overall survival outcome in low-grade glioma.** The curves denote the contribution of the 4-component gene signature (*MT-CO1*, *MT-CO2*, *MT-ND5*, *MT-ND6*), in males, to the overall survival outcome in patients from the low (blue – downregulated) and high (red – upregulated) expression groups. The censoring number refers to patients who did not suffer the outcome of interest during the specified study period. The overexpression of the signature has a more significant prognostic factor value.

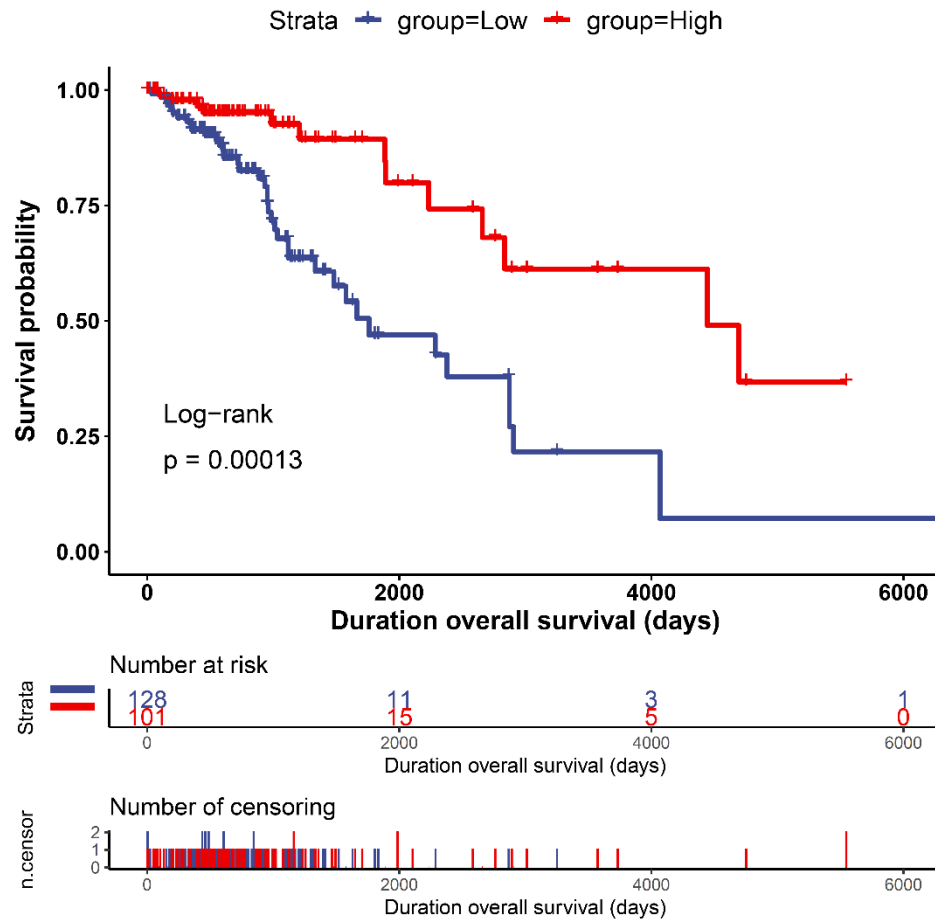

504  
505  
506  
507  
508  
509  
510  
511

**Figure S4. Kaplan-Meier plot of disease-specific survival outcome in low-grade glioma.** The curves denote the contribution of the 4-component gene signature (*MT-CO1*, *MT-CO2*, *MT-ND5*, *MT-ND6*), in females, to the disease-specific survival outcome in patients from the low (blue – downregulated) and high (red – upregulated) expression groups. The censoring number refers to patients who did not suffer the outcome of interest during the specified study period. The overexpression of the signature has a more significant prognostic factor value.

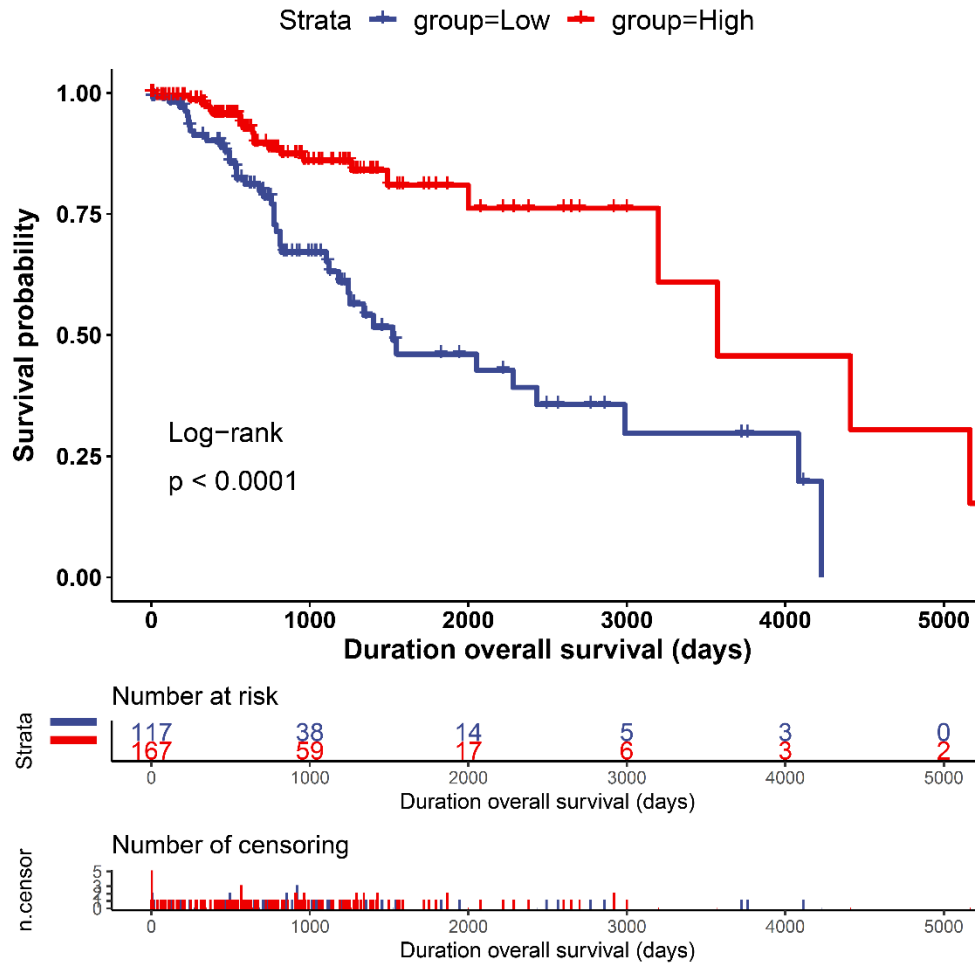

512  
513  
514  
515  
516  
517  
518  
519

**Figure S5. Kaplan-Meier plot of disease-specific survival outcome in low-grade glioma.** The curves denote the contribution of the 4-component gene signature (*MT-CO1*, *MT-CO2*, *MT-ND5*, *MT-ND6*), in males, to the disease-specific survival outcome in patients from the low (blue – downregulated) and high (red – upregulated) expression groups. The censoring number refers to patients who did not suffer the outcome of interest during the specified study period. The overexpression of the signature has a more significant prognostic factor value.

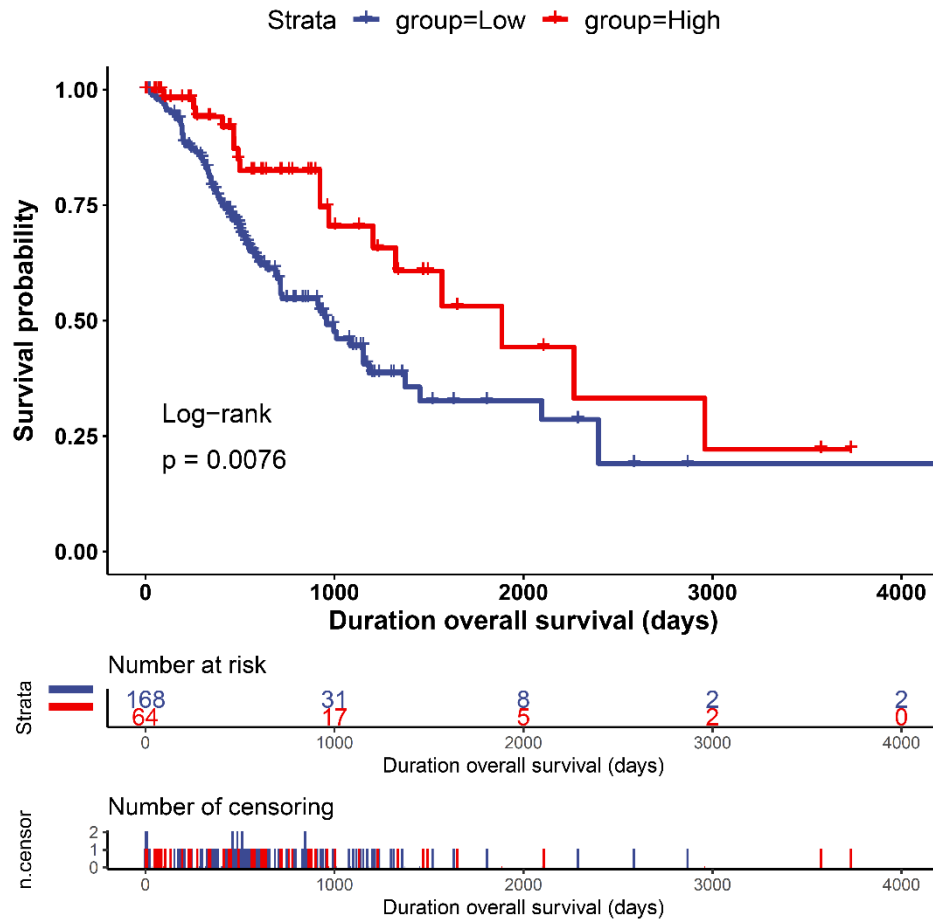

520  
521  
522  
523  
524  
525  
526

**Figure S6. Kaplan-Meier plot of progression-free-interval outcome in low-grade glioma.** The curves denote the contribution of the 4-component gene signature (*MT-CO1*, *MT-CO2*, *MT-ND5*, *MT-ND6*), in females, to the progression-free-interval outcome in patients from the low (blue – downregulated) and high (red – upregulated) expression groups. The censoring number refers to patients who did not suffer the outcome of interest during the specified study period. The overexpression of the signature has a more significant prognostic factor value.

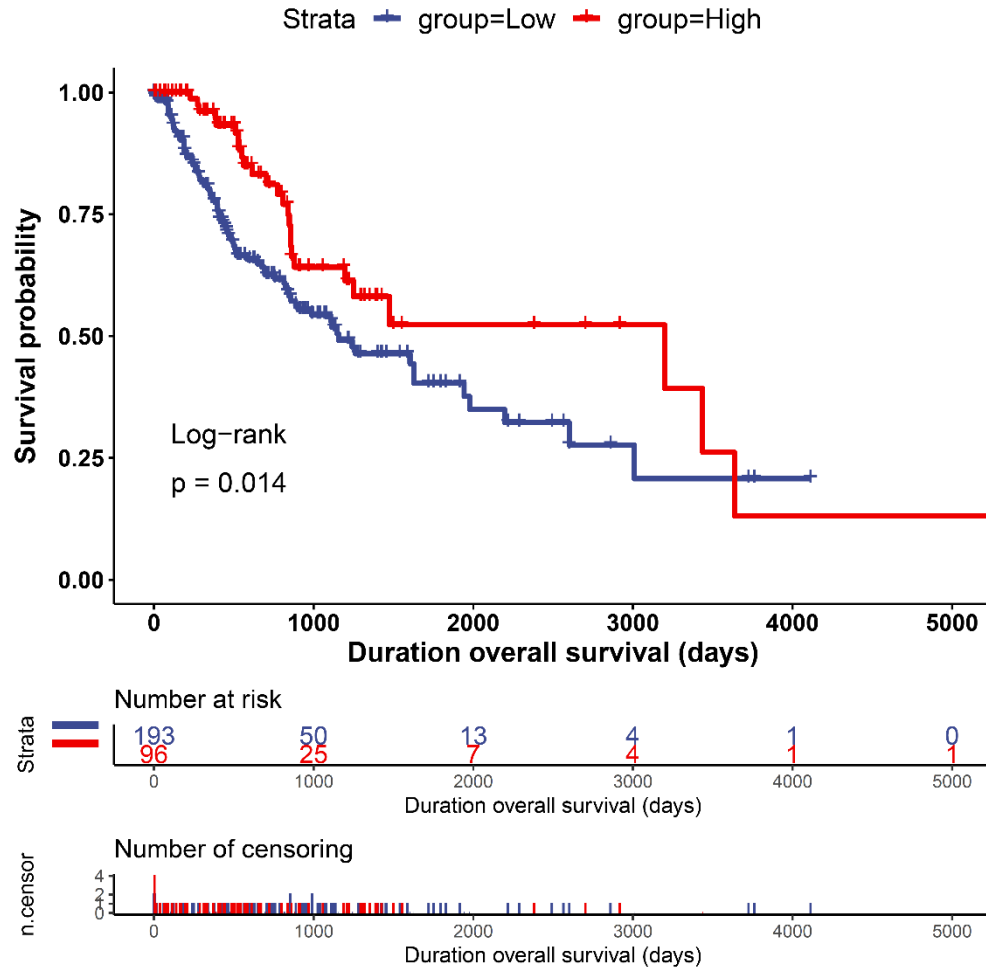

527  
528  
529  
530  
531  
532

**Figure S7. Kaplan-Meier plot of progression-free-interval outcome in low-grade glioma.** The curves denote the contribution of the 4-component gene signature (*MT-CO1*, *MT-CO2*, *MT-ND5*, *MT-ND6*), in males, to the progression-free-interval outcome in patients from the low (blue – downregulated) and high (red – upregulated) expression groups. The censoring number refers to patients who did not suffer the outcome of interest during the specified study period. The overexpression of the signature has a more significant prognostic factor value.

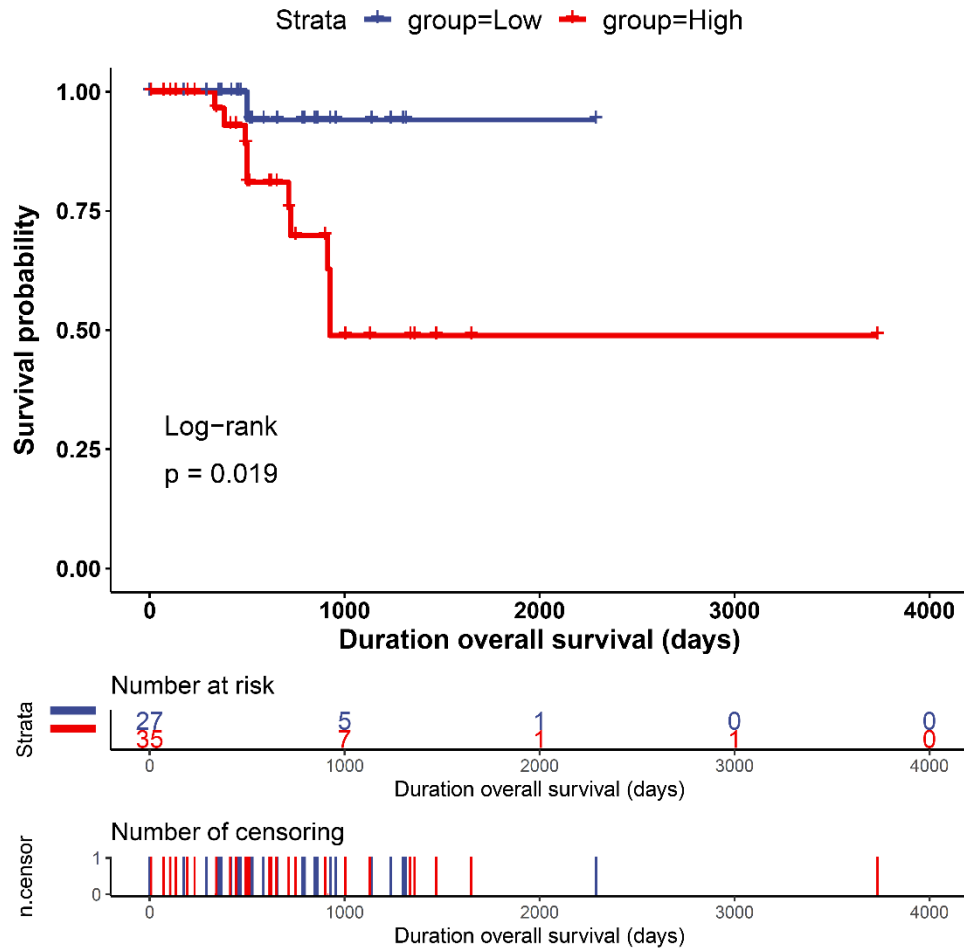

533  
534  
535  
536  
537  
538

**Figure S8. Kaplan-Meier plot of disease-free interval outcome in low-grade glioma in females.** The curves denote the contribution of the 4-component gene signature (*MT-CO1*, *MT-CO2*, *MT-ND5*, *MT-ND6*) to the disease-free interval outcome in female patients from the low (blue – downregulated) and high (red – upregulated) expression groups. The censoring number refers to patients who did not suffer the outcome of interest during the specified study period. The downregulation of the signature has a more significant prognostic factor value.



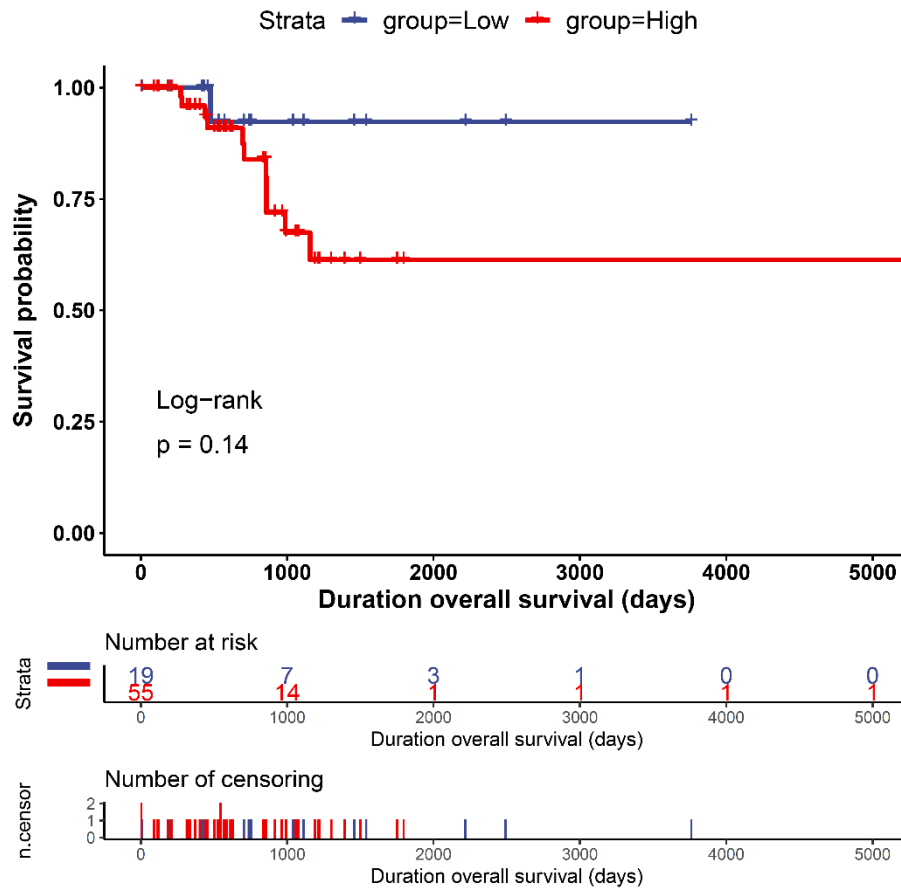

539

540

541

542

543

544

545

546

547

548

549

550

551

552

553

554

555

**Figure S9. Kaplan-Meier plot of disease-free interval outcome in low-grade glioma in males.** The curves denote the contribution of the 4-component gene signature (*MT-CO1*, *MT-CO2*, *MT-ND5*, *MT-ND6*), in males, to the disease-free interval outcome in patients from the low (blue – downregulated) and high (red – upregulated) expression groups. The censoring number refers to patients who did not suffer the outcome of interest during the specified study period. The overexpression of the signature has a more significant prognostic factor value.

## Protective or Risk Effects of the 4-component Gene Signature in Different Cancers

We observed a protective effect of the 4-component gene signature in LGG (hazard ratio -0.17), kidney chromophobe (KICH – hazard ratio -0.32), kidney renal papillary cell carcinoma (KIRP - hazard ratio -0.10), adrenocortical carcinoma (ACC - hazard ratio -0.19), pancreatic adenocarcinoma (hazard ratio -0.08) and hepatocellular liver carcinoma (LIHC - hazard ratio -0.05) (Figure 12) (Table S12). In contracts, the signature has a risk effect on thymoma (THYM – hazard ratio 0.25) and uterine corpus endometrial carcinoma (UCEC – hazard ratio 0.06) (Figure 13; Table S22).

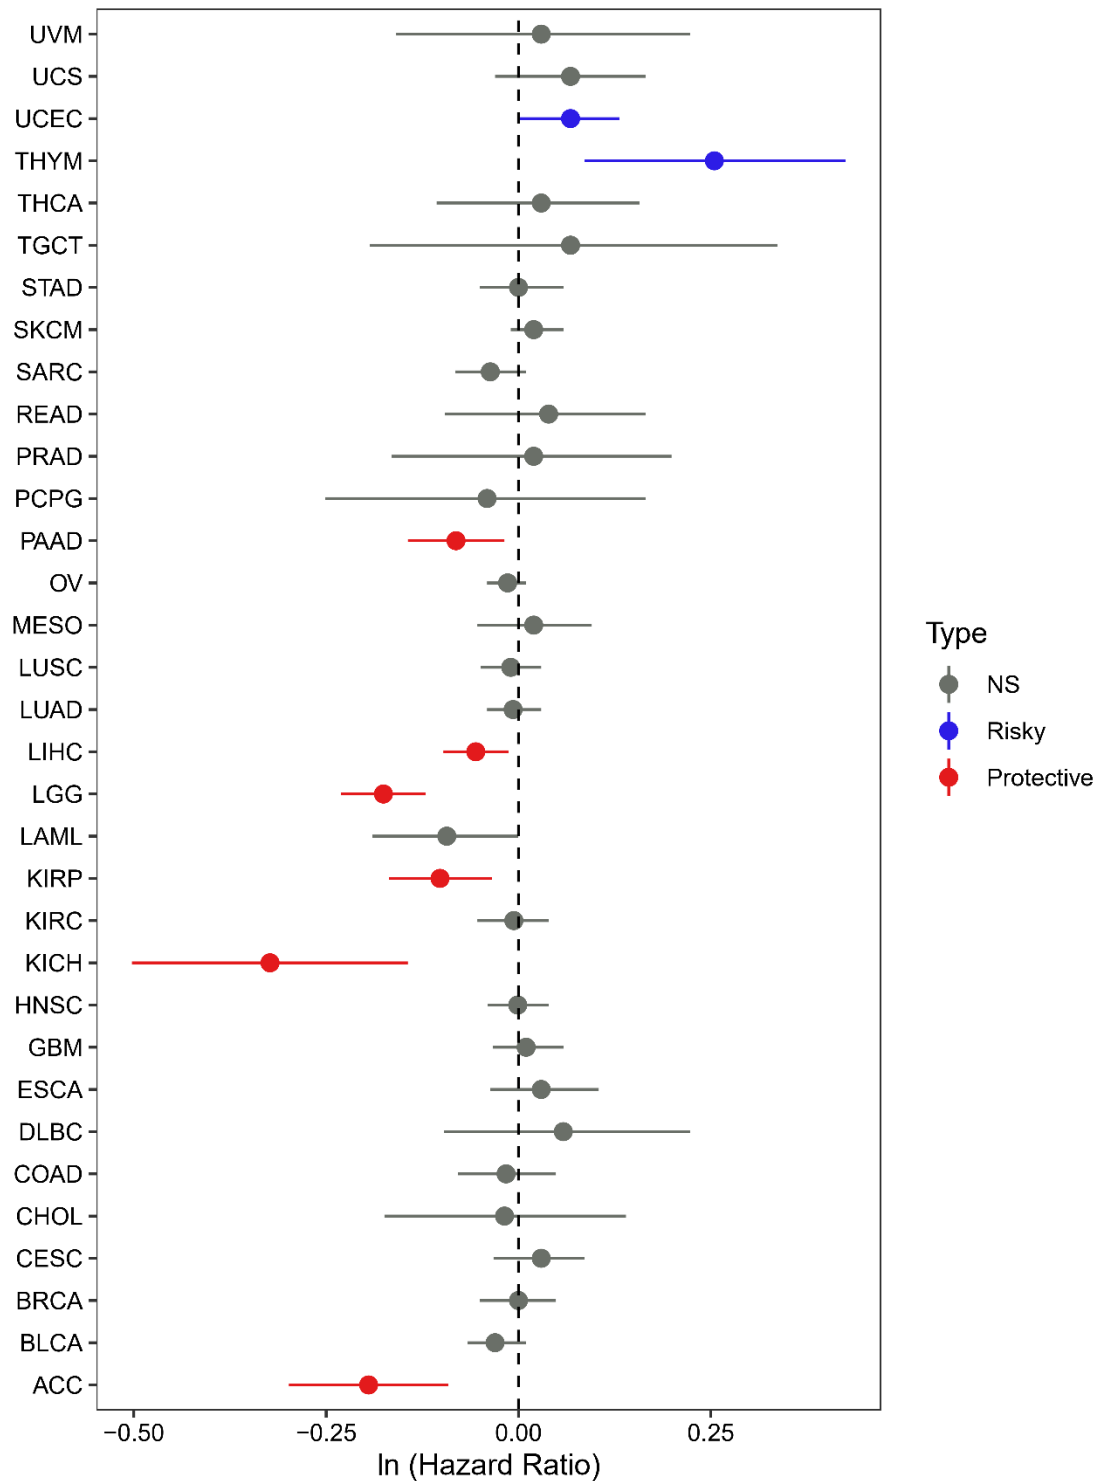

556  
557  
558  
559  
560

**Figure 13. Boxplot of the protective or risk effects of the 4-component gene signature based on hazard ratio.** Cox model analysis for the 4-component gene signature (*MT-CO1*, *MT-CO2*, *MT-ND5*, *MT-ND6*) in 33 cancer types. The signature is protective (red) in LGG, ACC, KICH, KIRP, LIHC, and PAAD cancers (p-value < 0.0113), but it has a risk effect (blue) in THYM and UCEC cancers (p-value < 0.0465).

## 561 Correlation Analysis Between Molecular Profiles and Immune Infiltrates

562

563 We estimated the degrees of the correlation between the mRNA expression levels of the 13  
 564 mitochondrial protein-coding genes and the molecular expression profiles indicative of immune cell  
 565 infiltrates in 33 cancer types (Table S23). For this analysis, we defined a gene signature as the  
 566 molecular expression profile of a minimum of three genes exhibiting the same direction of correlation.  
 567 The most extended, 13-component gene signature occurred in lymphoid neoplasm diffuse large B-cell  
 568 Lymphoma (DLBC), being positively correlated ( $\rho \geq 0.50$  p-value  $< 0.0003$ ) with neutrophil, NK,  
 569 T-cell CD4 memory, M1, /M2 macrophages, T-cell CD8+/CD4+, and B-cell memory cells (Figure 14).  
 570

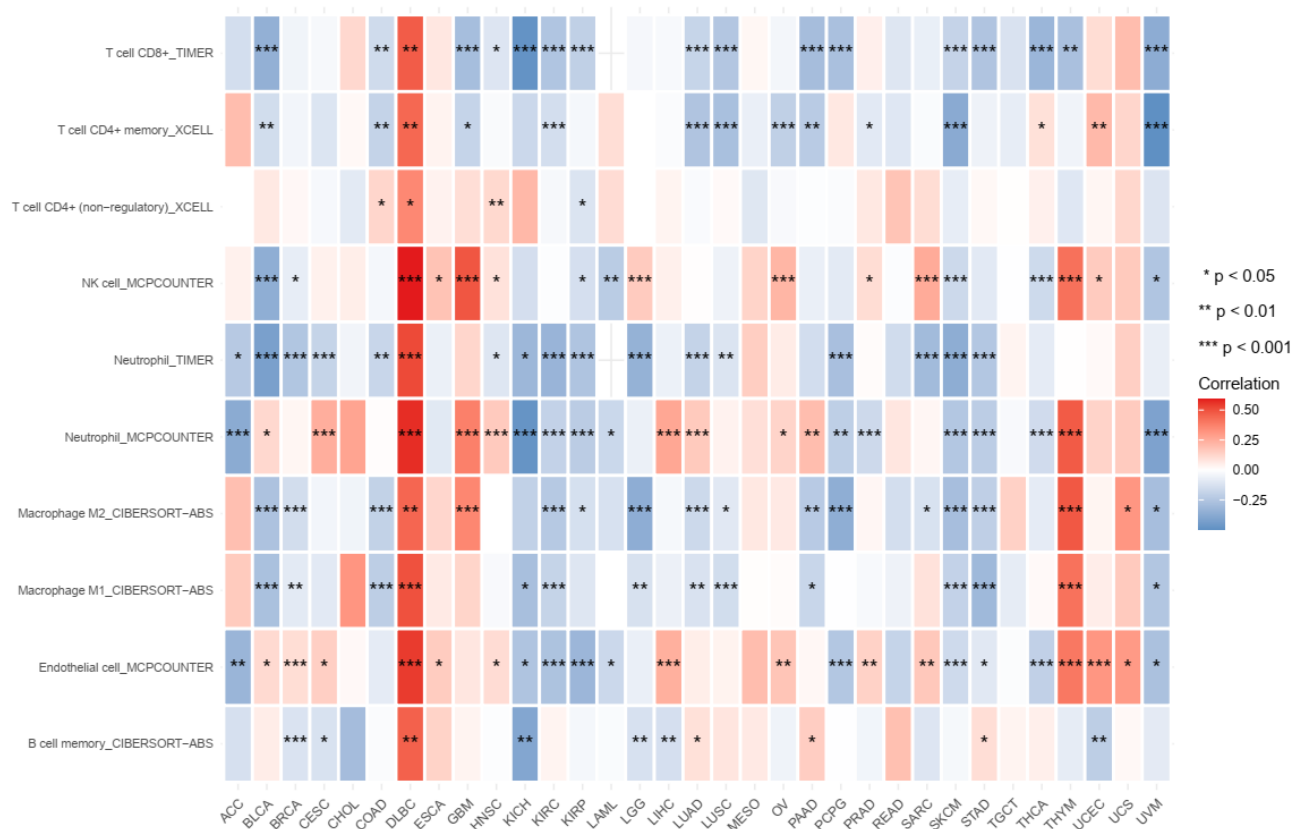

571

572 **Figure 14. Heatmap of the correlations between the expression profiles of the 13-component gene signature and**  
 573 **immune cell infiltrates.** The red-blue heatmap scale shows the significance levels of Spearman correlation coefficients  
 574 (\*\*\*, \*\*, \*). In DLBC, the 13-component gene signature is positively correlated with infiltrates of neutrophil, NK, T-cell  
 575 CD4 memory, M1/M2 macrophages, T-cell CD8+/CD4+, and B-cell memory cells ( $\rho \geq 0.50$  p-value  $< 0.0003$ ).  
 576

577 The second-longest signature is a 7-component gene signature (*MT-ND4L*, *MT-CYB*, *MT-ND1*, *MT-*  
 578 *ND4*, *MT-ND5*, *MT-ND6*, *MT-ATP8*), positively correlated ( $\rho \geq 0.50$ , p-value  $\leq 0.001$ ) with the  
 579 following cell immune infiltrates in thymoma (THYM): endothelial cell, neutrophil, myeloid  
 580 dendritic cell, T cell CD4+, and macrophage M2 (Figure S10) (Table S24).  
 581  
 582  
 583

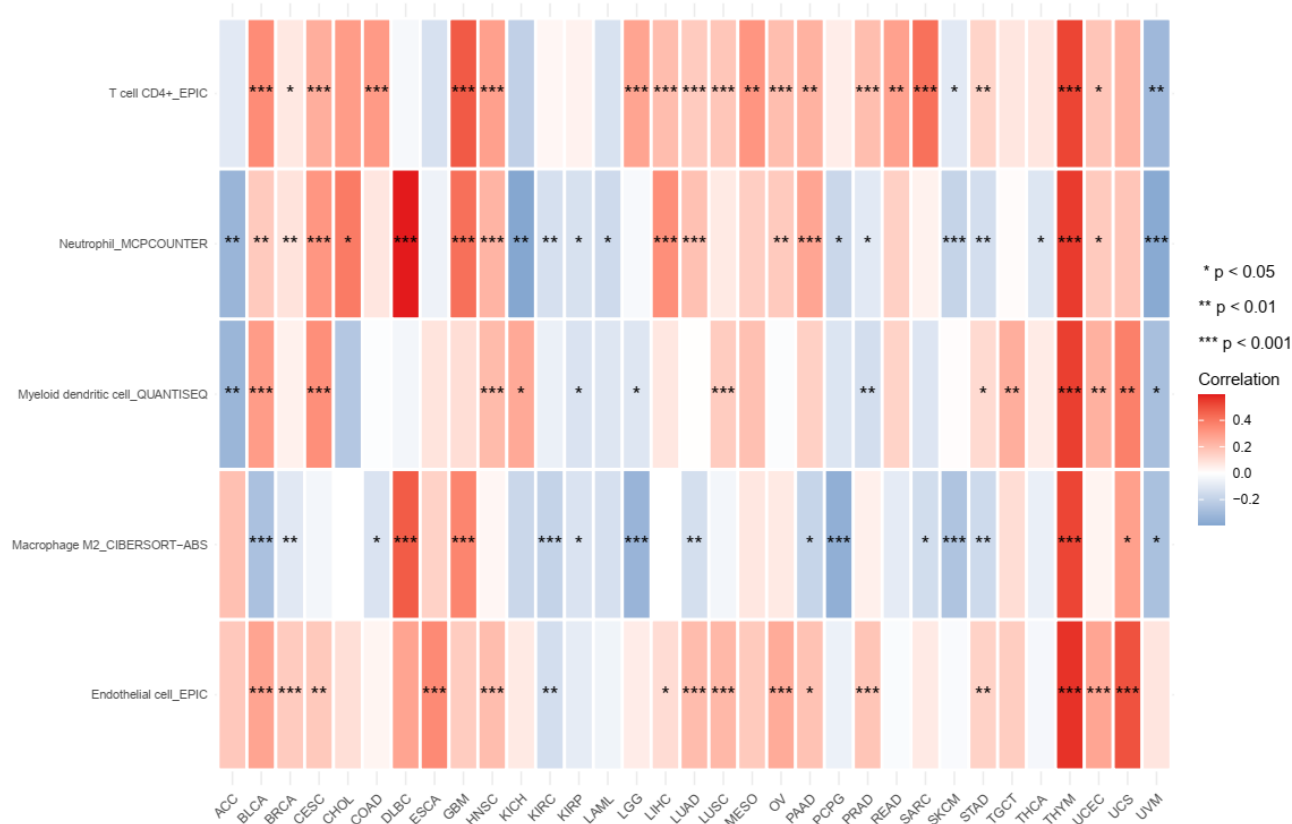

584  
585  
586  
587  
588  
589  
590  
591  
592  
593  
594  
595  
596

**Figure S10. Heatmap of the correlations between the expression profiles of the 7-component gene signature and immune cell infiltrates.** The red-blue heatmap scale shows the significance levels of Spearman correlation coefficients (\*\*\*, \*\*, \*). In THYM, the 7-component gene signature is positively correlated with infiltrates of endothelial cells, neutrophils, myeloid dendritic cells, T cell CD4+, and macrophage M2 ( $\rho \geq 0.50$ ,  $p$ -value  $\leq 0.001$ ).

In THYM, an 8-component gene signature (*MT-ATP8*, *MT-CO1*, *MT-CYB*, *MT-ND1*, *MT-ND2*, *MT-ND4*, *MT-ND4L*, *MT-ND5*) showed an inverse correlation with molecular profiles for the following cell infiltrates T cell CD4+ Th1, T cell, T cell regulatory (Tregs) ( $\rho \leq -0.5$ ,  $p$ -value  $\leq 3.05e-10$ ), Figure S11 (Table S25).

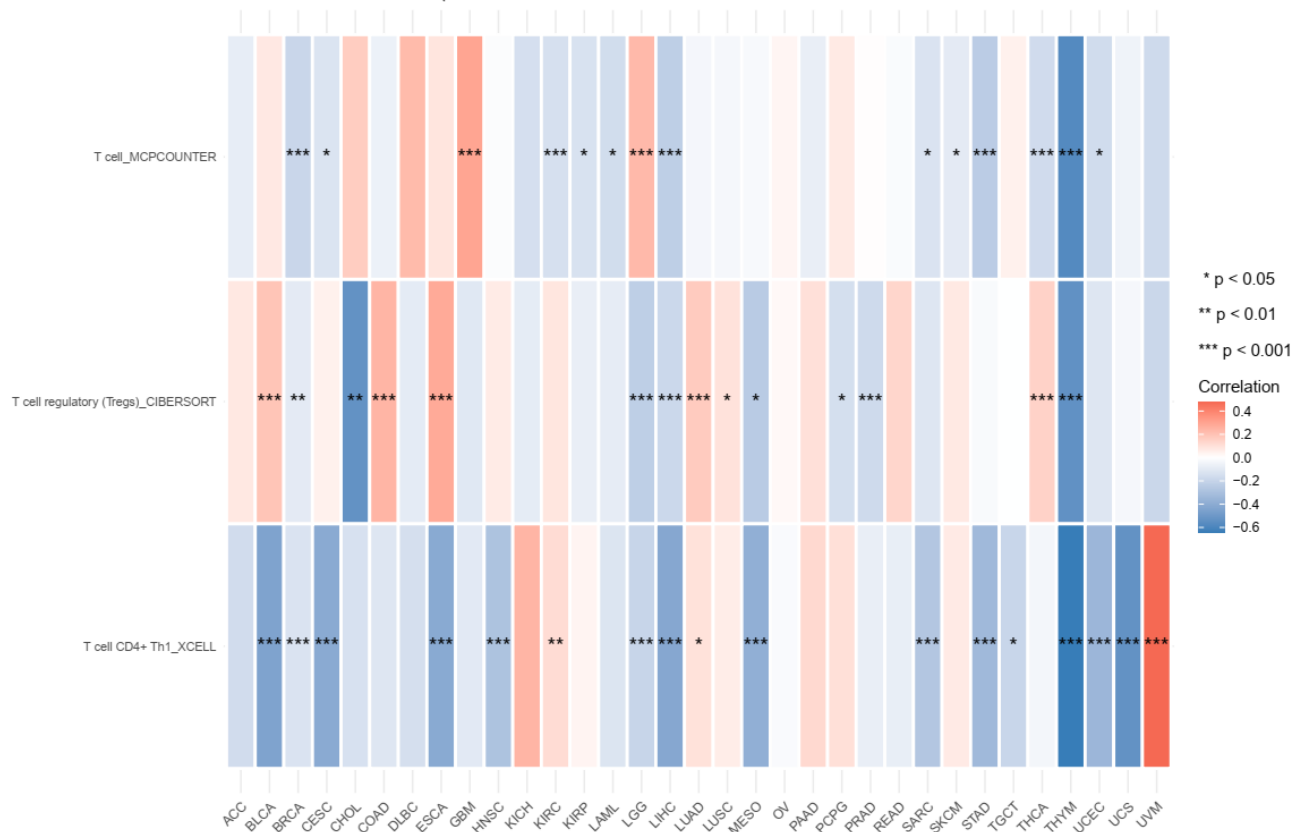

597  
 598 **Figure S11. Heatmap of the correlations between the expression profiles of the 8-component gene signature and**  
 599 **immune cell infiltrates.** The red-blue heatmap scale shows the significance levels of Spearman correlation coefficients  
 600 (\*\*\*, \*\*, \*). In THYM, the 7-component gene signature is negatively correlated with infiltrates of T cell CD4+ Th1, T cell,  
 601 and T cell regulatory (Tregs) ( $\rho \leq -0.5$ ,  $p\text{-value} \leq 3.05e-10$ ).  
 602  
 603

604 We also estimated the degrees of the correlation between the mRNA expression levels for the 4-  
 605 component gene signature (*MT-CO1*, *MT-CO2*, *MT-ND5*, *MT-ND6*) associated earlier with survival  
 606 risk in LGG and the gene profiles indicative of immune cell infiltrates in 33 cancer types. The 4-  
 607 component gene signature was positively correlated ( $\rho$  ranging 0.06-0.6  $p\text{-value} < 0.05$ ) with 111  
 608 profiles of immune cell infiltrates and negatively correlated ( $\rho$  ranging -0.56 to -0.059  $p\text{-value} <$   
 609 0.05) with 113 profiles of immune cell infiltrates in 33 cancer types. In LGG, the most significant  
 610 positive correlation ( $\rho > 0.3$ ,  $p\text{-value} < 2.01e-12$ ) was with monocyte, NK, and B cells (Figure 15),  
 611 whereas the negative correlation ( $\rho \leq 0.3$ ,  $p\text{-value} < 2.26E-12$ ) were with T cell CD4+ Th2,  
 612 macrophage M1 and M2, myeloid dendritic cell, neutrophil, and activated myeloid dendritic cell  
 613 activated cell infiltrates (Figure 16) (Table S26).

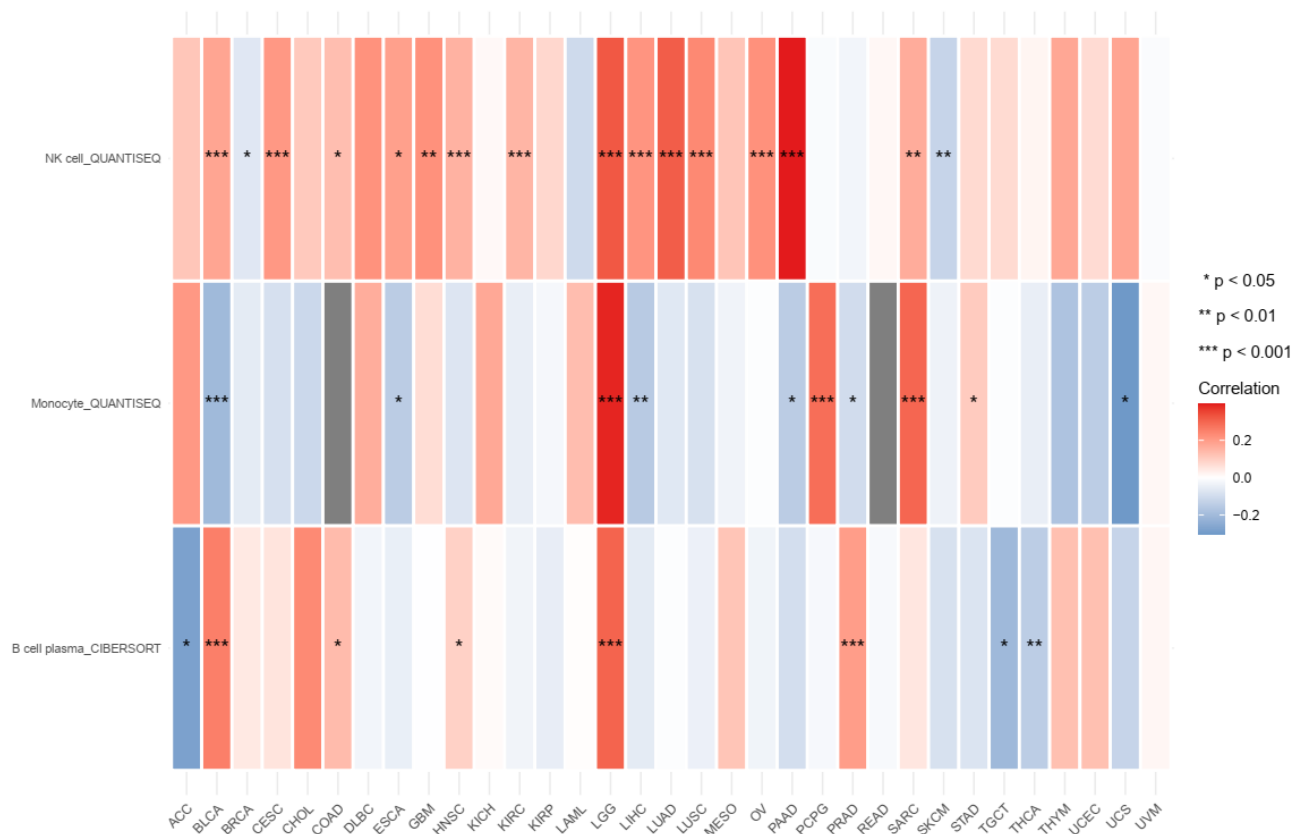

614  
 615 **Figure 15. Heatmap of the correlations between the expression profiles of the 4-component gene signature and**  
 616 **immune cell infiltrates.** The red-blue heatmap scale shows the significance levels of Spearman correlation coefficients  
 617 (\*\*\*, \*\*, \*). In LGG, the 4-component gene signature is positively correlated with infiltrates of monocyte, NK, and B cells  
 618 ( $\rho > 0.3$ ,  $p$ -value  $< 2.01e-12$ ).

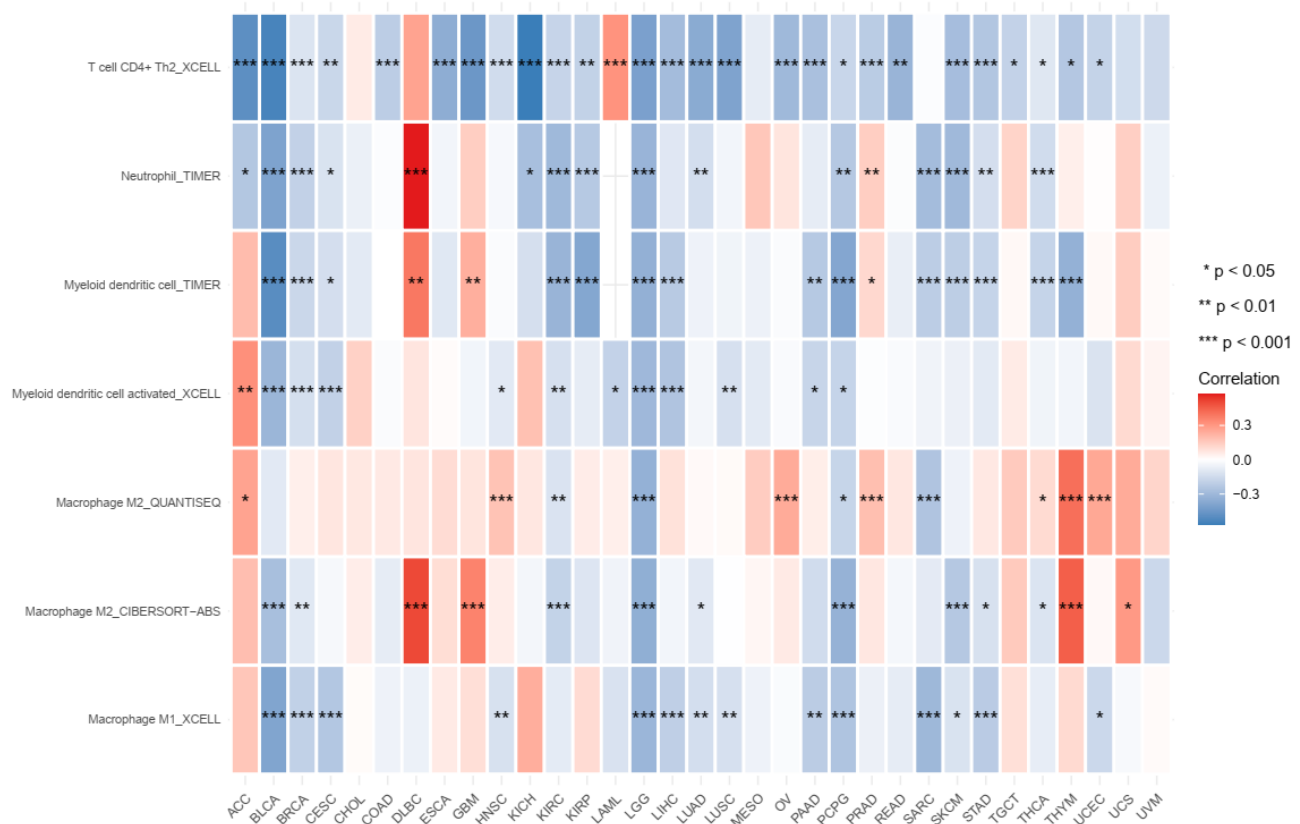

619

620

621 **Figure 16. Heatmap of the correlations between the expression profiles of the 4-component gene signature and**  
 622 **immune cell infiltrates.** The red-blue heatmap scale shows the significance levels of Spearman correlation coefficients  
 623 (\*\*\*, \*\*, \*). In LGG, the 4-component gene signature negatively correlates with T cell CD4+ Th2, macrophage M1 and  
 624 M2, myeloid dendritic cell, neutrophil, and activated myeloid dendritic cells cell activated cell infiltrates ( $\rho \leq 0.3$ , p-value  
 625  $< 2.26E-12$ ).  
 626

627

628

## 629 **Correlation Analysis between Molecular Expression Profiles and** 630 **Stemness**

631

632 The molecular expression profiles of the 13 mitochondrial protein-coding genes exhibited positive ( $\rho$   
 633 ranging 0.08-0.55,  $p < 0.045$  in 27 cancer types) and negative correlations ( $\rho$  ranging -0.51 to -0.06,  
 634  $p < 0.046$  in 24 cancer types) with stemness (Table S27). The most extended signatures with 13 and 12  
 635 components positively correlated with stemness in KICH ( $\rho = 0.50$  p-value = 0) and LAML ( $\rho = 0.28$  p-value = 0), respectively (Figure 17) (Table S18). The 13-component signature negatively  
 636 correlated with stemness in 19 cancer types, with the most significant inverse coefficient in uterine  
 637 corpus endometrial carcinoma, UCEC ( $\rho = -0.41$ ,  $p = 0$ ).

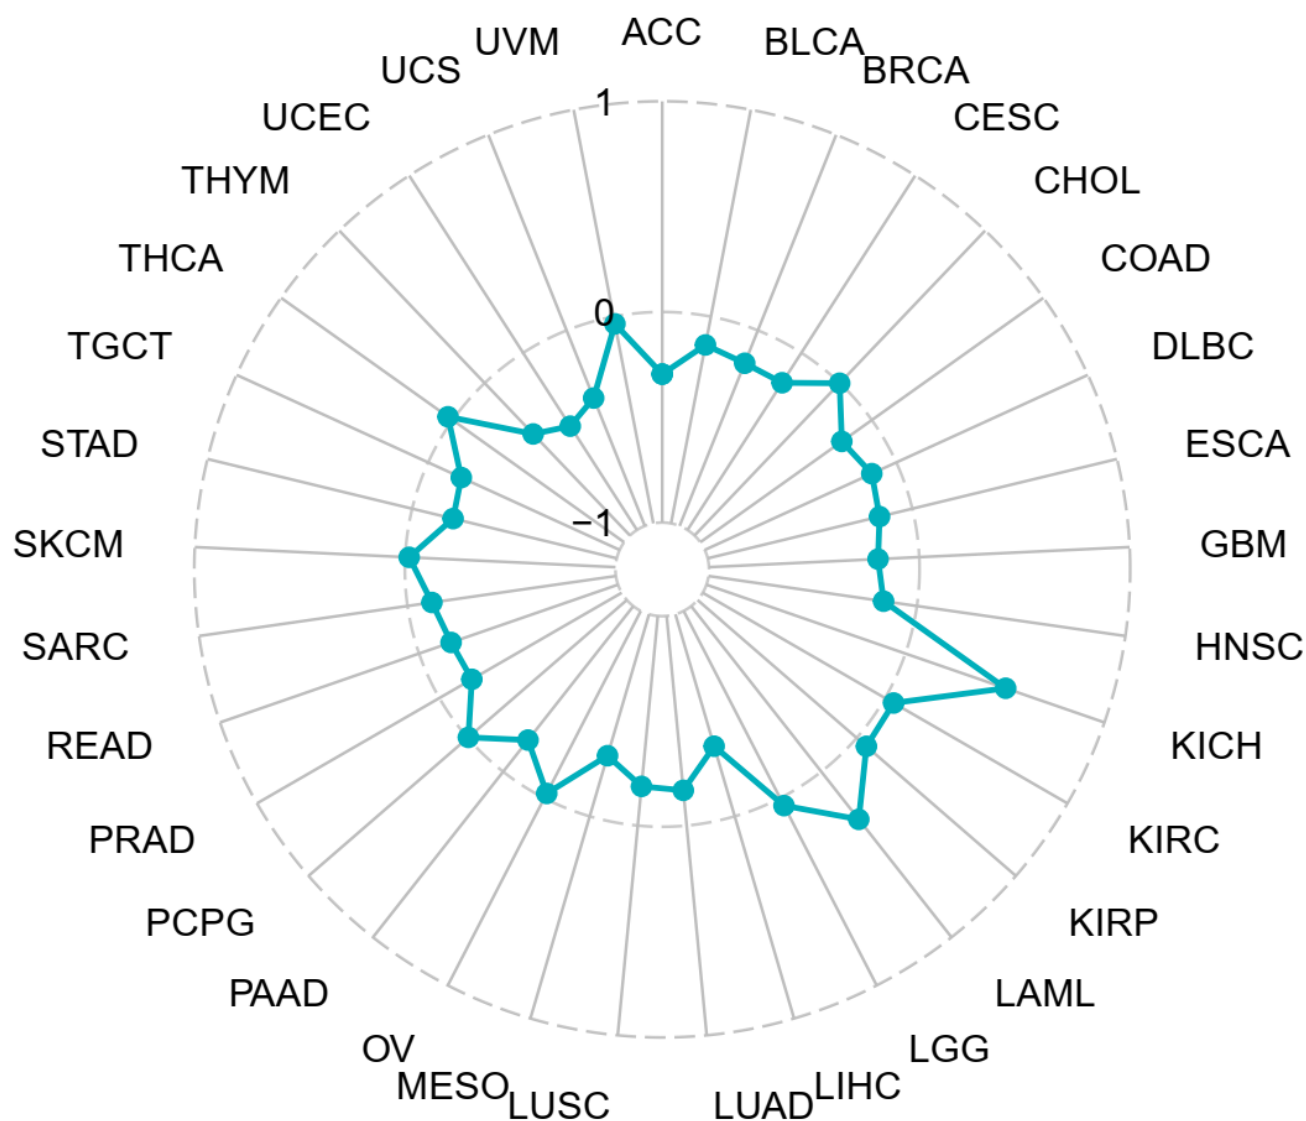

638  
639 **Figure 17. Radar plot for the correlation coefficients between the 13-component gene signatures and**  
640 **stemness in 33 cancer types.** Shown is the distribution of the breadth of the Spearman correlation coefficients,  
641 where the association can be positive (+1), negative (-1), or neutral (0). The more significant positive  
642 correlation with stemness occurred in KICH and LAML.

643  
644 **DISCUSSION**

645  
646 Here, we showed differential RNA expression of the 13 mitochondrial protein-coding genes in 33  
647 cancer types and normal tissues, where eleven genes (*MT-ND2*, *MT-ND1*, *MT-ATP8*, *MT-ATP6*, *MT-*  
648 *CO2*, *MT-CYB*, *MT-CO3*, *MT-ND4L*, *MT-ND4*, *MT-ND3*, *MT-CO1*) exhibited an under-expression  
649 profile in brain cancer. Moreover, the 13 mitochondrial protein-coding genes also demonstrated a sex  
650 effect in expression profiles in different tissues. A male-biased expression across ages occurred in *MT-*  
651 *ND5* for Artery – Aorta, Brain – Substantia Nigra, and Esophagus – Mucosa (Wilcox test,  $p \leq 0.001$ ),  
652 and in the *MT-ND6* for Brain – Hypothalamus and Kidney – Cortex (Wilcox test,  $p \leq 0.001$ ). A female-



653 biased across ages was also noticed in *MT-ATP6*, *MT-ATP8*, and *MT-CO1* for Artery – Coronary; *MT-*  
654 *CO1*, *MT-CO3*, and *MT-CYB* for Adipose – Visceral (Omentum); *MT-ND2* in Brain – Frontal Cortex  
655 (BA9) and Brain – Substantia Nigra; *MT-ND1* for Brain – Substantia Nigra. Interestingly, the *MT-ND5*  
656 also exhibits a biased expression across ages in Artery – Aorta, Brain – Frontal Cortex (BA9), and  
657 Colon – Transverse, but for females across different age groups. The same was noticed for *MT-ND6* in  
658 Brain – Frontal Cortex (BA9) and Brain – Substantia Nigra. The mitochondrial protein-coding genes  
659 exhibited a possible aging effect in expression profiles for the different age groups (20-49-year-old,  
660 50-59-year-old, and 60-79-year-old) in different tissues, where the expression was higher in the 60-79-  
661 year-old group. In this group, we observed three genes (*MT-CO1*, *MT-ND5*, and *MT-ND6*, *MT-ND3*;  
662 Wilcox test,  $p \leq 0.01$ ) with the most significant expression profile in different tissues (Artery –  
663 Coronary, Brain – Amygdala, Colon – Sigmoid, Esophagus – Muscularis, Minor Salivary Gland, and  
664 Small Intestine – Terminal Ileum). Furthermore, a possible age-group-dependent sex-biased effect was  
665 observed across the 52 tissues analyzed for the 13 mitochondrial protein-coding genes and polymorphic  
666 site expression. A female age-group-dependent sex-biased effect was noticed for ten different tissues  
667 between the three age groups (20-49-year-old, 50-59-year-old, and 60-79-year-old; Tukey test,  $p$   
668  $\leq 0.05$ ), and a male age-group-dependent sex effects was observed for seven different tissues also  
669 between the three age groups (Tukey test,  $p \leq 0.05$ ). Thus, the polymorphic site expression of 13  
670 mitochondrial protein-coding genes exhibited a sex-age-biased between the three age groups. The  
671 difference was higher in the last group (60-79-year-old).  
672

673 The RNA profiles of the 13 mitochondrial protein-coding genes also exhibited a 4-component gene  
674 signature (*MT-CO1*, *MT-CO2*, *MT-ND5*, and *MT-ND6*) with under-expression in LGG (hazard ratio  
675 range 0.41-0.51, Logrank  $p \leq 0.00026$ ,  $p(\text{HR}) \leq 0.00033$ ). This signature was associated with survival  
676 outcomes in LGG for different categories, where the overexpression was associated with OS, DSS, and  
677 PFI (Log-rank  $p \leq 0.0076$ ). The 4-component gene signature was not affected by sex, OS, DSS, or PFI.  
678 Only for DFI outcome, we observed a sex-specific association in female patients, with a greater  
679 prognostic factor value (Log-rank  $p = 0.019$ ) compared to males (Log-rank  $p = 0.14$ ). The 13  
680 mitochondrial protein-coding genes demonstrated a protective effect for the 4-component gene  
681 signature in LGG (hazard ratio -0.17) and a risk effect on THYM – hazard ratio 0.25 and UCEC –  
682 hazard ratio 0.06. We noticed different component gene signatures for the 13 mitochondrial protein-  
683 coding genes in the immune cell infiltrates. The most extended, 13-component gene signature occurred  
684 in DBLC, positively correlated with neutrophil, NK, T-cell CD4 memory, M1 and M2 macrophages,  
685 T-cell CD8+/CD4+, and B-cell memory cells. Moreover, the 4-component gene signature's most  
686 significant positive correlation in LGG ( $\rho > 0.3$ ,  $p\text{-value} < 2.01e-12$ ) was with monocyte, NK, and B  
687 cells, whereas the negative correlation ( $\rho \leq 0.3$ ,  $p\text{-value} < 2.26E-12$ ) were with T cell CD4+ Th2,  
688 macrophage M1 and M2, myeloid dendritic cell, neutrophil, and activated myeloid dendritic cell  
689 activated cell infiltrates. The molecular expression profiles of the 13 mitochondrial protein-coding  
690 genes exhibited positive and negative correlations in 24 cancer types with stemness. The most extended  
691 signatures with 13 and 12 components were positively correlated with stemness in KICH ( $\rho = 0.50$   
692  $p\text{-value} = 0$ ) and LAML ( $\rho = 0.28$   $p\text{-value} = 0$ ), respectively. The 13-component signature negatively  
693 correlated with stemness in 19 cancer types, with the most significant inverse coefficient in UCEC ( $\rho$   
694  $= -0.41$ ,  $p = 0$ ). The differentially expressed profiles of the 13 mitochondrial protein-coding genes in  
695 cancer have prognostic factor values in clinical studies. The correlation between the differentially  
696 expressed gene signatures and tumor stemness in LGG and immune cell infiltrates suggests that the  
697 reported signatures are proxies of oncogenic dedifferentiation.  
698

699 Genome-wide screening of normal versus cancer transcription provides knowledge about the molecular  
700 information of cancer progression. It enables identifying transcriptional changes in differentially

701 expressed genes (DEGs) to determine their prognostic role in clinical outcomes. The gene-by-gene  
702 analysis studies in most of the 13 mitochondrial protein-coding genes demonstrated that their RNA  
703 expression is significantly suppressed in several cancer types, such as breast, colon, kidney, and liver,  
704 the exception being KICH, with all genes overexpressed (Reznik et al., 2017; Kim et al., 2020).  
705 However, these studies considered the full range of logFC values and significant FDR values. In our  
706 analysis, we used a more restrictive method accepting only magnitudes of differential expression logFC  
707 values ( $\geq 1.5$  or  $\leq -1.5$ ) with genome-wide FDR values  $\leq 5e-5$ . Thus, our restrictive methods allowed  
708 the identification of eleven genes downregulated in brain cancer (*MT-ATP6*, *MT-ATP8*, *MT-CO1*, *MT-*  
709 *CO2*, *MT-CO3*, *MT-CYB*, *MT-ND1*, *MT-ND2*, *MT-ND3*, *MT-ND4*, *MT-ND4L*), six in liver cancer (*MT-*  
710 *ATP6*, *MT-ATP8*, *MT-CYB*, *MT-ND2*, *MT-ND4*, *MT-ND4L*) and four in breast cancer (*MT-ATP8*, *MT-*  
711 *CYB*, *MT-ND1*, *MT-ND2*). In contrast, overexpression happens in AML (*MT-ND4*, *MT-ND5*, *MT-CO1*,  
712 *MT-ND4L*) and ovary cancer (*MT-ND6*, *MT-ND1*, *MT-CO1*).

713  
714 The sex differences in gene expression have already been observed in different tissues, but nowadays,  
715 the mechanism behind the tissue-specific sex differences in gene expression is not understood (Rinn  
716 and Snyder, 2005; Ellegren and Parsch, 2007; Parsch and Ellegren, 2013). Thus, the sexual dimorphism  
717 in gene expression is still hard to describe, partly because the sex-related differences in the autosomal  
718 gene expression occur in various tissues (Mele et al., 2015). Additionally, gene expression during aging  
719 has already been studied between the sexes for several tissues (Tower, 2017). However, there are few  
720 references in the literature regarding the effects of aging on the expression of different tissues. A few  
721 reports demonstrated a low level of gene expression in older tissues, such as muscle, epicardial adipose  
722 tissue, and brain (Welle et al., 2003; Berchtold et al., 2008; Iacobellis, 2021). Thus, we wished to  
723 investigate whether there are sex-specific differences in the expression of the 13 mitochondrial protein-  
724 coding genes and if there is a difference in the expression of these genes between the tissues at different  
725 ages. Here, in males, two genes exhibited a male-biased expression in different tissues (*MT-ND5* for  
726 Artery – Aorta, Brain – Substantia Nigra, and Esophagus – Mucosa, and in the *MT-ND6* for Brain –  
727 Hypothalamus and Kidney – Cortex). Other nine genes showed a female-biased expression in different  
728 tissues (*MT-ATP6*, *MT-ATP8*, and *MT-CO1* for Artery – Coronary, *MT-CO1*, *MT-CO3* and *MT-CYB*  
729 for Adipose – Visceral (Omentum); *MT-ND2* for Brain – Frontal Cortex (BA9) and Brain – Substantia  
730 Nigra; *MT-ND1* for Brain – Substantia Nigra). *MT-ND5* also exhibits a biased expression in Artery –  
731 Aorta for females and in other tissues (Brain – Frontal Cortex (BA9) and Colon – Transverse). In  
732 agreement, Tower has reported that gene expression during aging has already been studied between  
733 the sexes for several tissues, such liver, which exhibits high sex-specific tissue expression with changes  
734 during aging (Tower, 2017).

735  
736 Considering the evidence of a differential expression with age in coding genes (Frenk and Houseley,  
737 2018), we decided to investigate possible differences in the expression of our mitochondrial protein-  
738 coding genes between 52 different tissues in the three age groups. Thus, we observe thirty-four tissues  
739 ( $n=34$ ) have significantly different expression profiles (Wilcoxon test,  $p \leq 0.05$ ) in 20-49-year-old and 60-  
740 79-year-old groups for the 13 mitochondrial protein-coding genes. However, when we look more  
741 specifically at the tissue-specific expression for the different ages, we observe significant differences  
742 in different tissues' expression. The artery – Coronary tissue exhibited more significant expression in  
743 the 20-49-year-old group (Wilcoxon test,  $p \leq 0.001$ ) than other tissues in this group. For the 50-59-year-  
744 old group (Wilcoxon test,  $p \leq 0.01$ ), the most significant differences in tissue expression occurred in the  
745 Brain – Cerebellar Hemisphere, Adipose – Visceral Omentum, and Bladder. This difference in  
746 expression of tissues also occurred in the group 60-79-year-old for Colon – Sigmoid, Artery – Coronary,  
747 Adipose – Visceral Omentum, and Minor Salivary Gland (Wilcoxon test,  $p \leq 0.05$ ). In accordance, Frenk  
748 and colleagues discuss that the aging effect in gene expression may occur for reasons not necessarily

749 equivalent to programmed aging. Thus, gene expression changes may be reactive to physiological or  
750 cellular changes (Frenk and Houseley, 2018). Other studies also demonstrated that the most association  
751 of aging transcriptome is a consistent change of mitochondrial protein mRNAs, which was also  
752 observed in humans (de Magalhaes et al., 2009; van den Akker et al., 2014; Peters et al., 2015). No other  
753 evidence was found about the age-biased or sex-biased effect in humans' 13 mitochondrial protein-  
754 coding genes.

755  
756 Although most aging-related changes are correlated with declining mitochondrial function and ROS  
757 overproduction, oxidative damage, and accumulation of mtDNA mutations in somatic tissues, it's  
758 necessary to emphasize the relationship between aging and defects of a wide range of proteins encoded  
759 by mtDNA (Poyton and McEwen, 1996; Scarpulla, 2008). In this context, we investigated the sex-  
760 dependent polymorphic site differences for mitochondrial protein-coding genes in different tissues. In  
761 this way, we observe a possible age-group-dependent sex effects expression in ten different tissues for  
762 females and seven for males between the three tested age groups. In agreement, another study reports  
763 evidence that aging occurs differently among males and females as expected from the phenotypic  
764 differences associated with aging (Mele et al., 2015; Kim et al., 2016; Gershoni and Pietrokovski,  
765 2017; Naqvi et al., 2019). Other studies still report that breast tissue has the most sexual differentiation  
766 (Mele et al., 2015; Gershoni and Pietrokovski, 2017; Lopes-Ramos et al., 2020), but interestingly, in our  
767 study, we notice a sex-biased gene expression for breast tissue related to age groups. Thus, human  
768 aging phenotypes may be not only sex-specific but, in a more complex way, age-group-dependent.

769  
770 In the last ten years, the sequencing and bioinformatic approaches expanded the possibility of accessing  
771 and handling gene signature data. This improves the analysis of survival outcomes for patients with  
772 several cancers (Rao et al., 2011; Gao et al., 2019; Li et al., 2019; Zhang et al., 2020; Pawar et al., 2022).  
773 Thus, investigating gene signature expression from mitochondrial protein-coding genes related to  
774 cancer survival outcomes was possible, which led us to perform additional analysis of these approaches  
775 in this study. In this context, Schopf and colleagues performed an analysis of gene-expression  
776 signatures of tumor sample transcriptomes that allowed the identification of several tumors associated  
777 with a shorter survival time (Schopf et al., 2020). Here we investigate whether 13 mitochondrial  
778 protein-coding genes exhibit a gene signature for survival outcomes in 33 different cancer types across  
779 donors of the TCGA cohort and whether the sex-specific differences are risk factors in cancer. We  
780 identified a novel 4-component mitochondrial protein-coding gene signature (*MT-CO1*, *MT-CO2*, *MT-*  
781 *ND5*, *MT-ND6*) whose molecular expression profile has a prognostic factor value for survival outcomes  
782 in LGG. Xiao and colleagues demonstrate that other gene signatures, such as CD44-related genes, with  
783 high-risk expression in LGG, are associated with greater survival rates in OS and disease-free survival  
784 (Log-rank  $p < 0.0001$ ) (Xiao et al., 2020b). Here, we observe the 4-component gene signature exhibiting  
785 an over-expression profile in OS and DSS for LGG with elevated survival rates in the high-risk group  
786 (Log-rank  $p < 0.0001$ ). In contrast, Xiao and colleagues showed that patients in the high-risk group  
787 had significantly poorer survival results (Log-rank  $p = 0.000012$ ) in not mitochondrial gene signatures  
788 for LGG (Xiao et al., 2020a). Other studies have already demonstrated a better prognosis in survival  
789 results for the low-risk group using gene signatures (Log-rank  $p < 0.0001$ ) (Chen et al., 2021; Guo et  
790 al., 2021). Additionally, the low-risk group related to the 4-component gene signature exhibits a poor  
791 prognosis compared to the high-risk group in OS, DSS, and PFI survival outcomes.

792  
793 In a study restricted to lung squamous cell carcinoma (LUSC) and lung adenocarcinoma (LUAD) (Li  
794 et al., 2018), the two major subtypes of lung cancer, the 13 mitochondrial respiratory genes were  
795 reported to be downregulated in tumor tissues compared with matched control tissues. The under-  
796 expression of *MT-ND5* or *MT-ND6* genes was associated with overall survival outcomes and tumor

797 progression in LUAD and LUSC. Our gene-by-gene analysis confirmed the above associations with  
798 overall survival outcomes in LUAD (*MT-ND6* Log-rank test statistics = 10.04, p-value = 0.001529;  
799 *MT-ND5* Log-rank = 4.186, p-value = 0.04076), when the samples were clustered into two expression  
800 groups (Figures S10-S11), as well in LUSC, both *MT-ND6* and *MT-ND5* (Figure S18 and S25) was  
801 not significant for the overall survival patients (*MT-ND6* Log-rank p-value = 0.4; *MT-ND5* Log-rank  
802 p-value = 0.19). However, we extended the association with three other survival outcomes: DSS, DFI,  
803 and PFI (Figure S10-S25).

804  
805 Identifying gene signatures as risk effect factors may be relevant for proposing personalized treatment  
806 of several cancers, such as hepatocellular carcinoma, colon cancer, and gliomas (Li et al., 2020;Liu  
807 and Li, 2021;Zhao et al., 2021). We aimed to identify a correlation between protective or risk effects  
808 associated with survival outcome for the 13 mitochondrial protein-coding genes in 33 different cancer  
809 types by using the TCGA cohort. Concerning the protective effect associated with survival outcome in  
810 this study, we found and 4-component gene signature (*MT-CO1*, *MT-CO2*, *MT-ND5*, *MT-ND6*) with  
811 the association in six different cancer types (ACC, KICH, KIRP, LIHC, LGG, PAAD; hazard ratio  
812 ranging -0.08 to -0.32). Regarding the risk effects, two tissues exhibited associations (THYM and  
813 UCEC; hazard ratio ranging from 0.06 to 0.25). To LGG, Zhang and colleagues showed a  
814 protective/risk effect using gene signatures (non- mitochondrial) correlation (Zhang et al., 2019).  
815 Accordingly, autophagy gene signature also exhibited a risk effect factor for LGG patients (Lin and  
816 Lin, 2021). Equally, Wang and colleagues demonstrate evidence of risk signatures genes (Wang et al.,  
817 2022). In the same way, other gene signatures, extracellular matrix related, exhibited a risk effect for  
818 gliomas in the TCGA cohort but also demonstrated an association with immune infiltrates (Liu and Li,  
819 2021). In contrast, we observed a protective effect factor in LGG patients to four mitochondrial  
820 components gene signature, which is not shown in the literature now.

821  
822 Studying gene signatures associated with immune infiltrates may provide a potential clinical  
823 implication for cancer treatment and prognosis (Iglesia et al., 2016;Yan et al., 2020). Thus, we use the  
824 13 mitochondrial protein-coding genes in the context of gene signature to correlate with immune cell  
825 infiltrates in 33 cancer types from the TCGA cohort. Studies already show evidence about gene  
826 signatures, such as autophagy genes related, strongly associated with six immune cell infiltrates  
827 (macrophages M0 and M1, Neutrophils, T cells CD8, T cells follicular helper, T cells reg) in LGG  
828 (Quan et al., 2021). Additionally, other gene signatures, such as immune-related genes, demonstrate  
829 positive and negative correlations with several immune cell infiltrates in LGG (macrophages, dendritic  
830 cells, B cells, and CD4 T cells) (Pan et al., 2021). In the same way, our study showed positive and  
831 negative correlations with immune infiltrates in LGG, with monocyte, NK, and B cells, T cell CD4+,  
832 macrophage (M1 and M2), and myeloid dendritic cells.

833  
834 In this way, our mitochondrial protein-coding gene signature positively correlates with M1 and M2  
835 macrophages from immune cells infiltrated in LGG. Similarly, in DLBC the 13-component gene  
836 signature show a positive correlation for six cells including neutrophils. In agreement, M2 macrophage  
837 has been confirmed to promote immunosuppression and proliferation of LGG; on the other hand, T  
838 cells and natural killer (NK) cells can be associated with poorer OS and DSS in LGG, both in non-  
839 mitochondrial gene signature (Ye et al., 2021;Zhu et al., 2022). Concerning DLBC prognosis, the  
840 tumor-associated neutrophils show a poor prognostic, in the same way, Manfroi and colleagues  
841 demonstrated that in DLBC patients with a higher ratio of neutrophils had a worse prognosis, both in  
842 non-mitochondrial gene signature (Manfroi et al., 2018;Mu et al., 2018). In other studies, it is also  
843 possible to observe T-lymphocyte signatures impacting the prognosis of patients with DLBC,



844 demonstrating the importance of survival gene signatures in aggressive B-cell lymphomas (Ansell et  
845 al., 2001;Keane et al., 2013;Keane et al., 2015).

846

847 Using gene signatures to study tumor stem cells has provided new insights about stemness for  
848 measuring the degree of oncogenic dedifferentiation. A correlation between stemness signatures and  
849 unfavorable outcome for some cancers, including gliomas, was observed in the literature for the TCGA  
850 cohort (Malta et al., 2018). In agreement, there is evidence of gene signatures, such as the 5-mRNA  
851 signature, that correlate with stemness in melanoma and hepatocellular carcinoma, which exhibit a  
852 negative correlation for these cancers (Cai et al., 2021;Zhang et al., 2021). Furthermore, cancer  
853 stemness has been demonstrated to be associated with kidney cancers, such as KIRC, but not for KICH,  
854 and negatively correlates with immune infiltrates (Xiao et al., 2021). Additionally, other studies  
855 demonstrated a stemness-related gene signature expression in cancers such as hepatocellular  
856 carcinoma, pancreatic ductal adenocarcinoma, and endometrial cancer as a novel prognostic marker  
857 for survival (Hong et al., 2021;Huang et al., 2021;Xu et al., 2021). In this study, we report a significant  
858 positive correlation between the expression profiles of the 13 mitochondrial gene signatures and  
859 stemness in KICH and LAML, as well as a negative correlation in THYM and UCEC. Thus, identifying  
860 gene signatures with prognostic models based on stemness provides a powerful tool for cancer  
861 treatment.

862

## 863 **CONCLUDING REMARKS**

864

865 LGG downregulates mitochondrial protein-coding genes. The downregulated 4-component gene  
866 signature (*MT-CO1*, *MT-CO2*, *MT-ND5*, *MT-ND6*) exhibits good OS, DSS, and PFI predictive value,  
867 and DFI and PFI survival were female-biased. The expression of *MT-ND5* and *MT-ND6* is female-  
868 biased in brain tissues. Age-dependent sex bias occurs in brain tissues, with higher gene expression in  
869 the 50-59 and 60-79-year-old populations. Distinct immune cell infiltrates were associated with  
870 mitochondrial protein-coding gene signature in LGG. We found a stemness-related gene signature for  
871 all 13 mtDNA genes in KICH. This study identifies mitochondrial prognostic genes.

872

873

874

## 875 **WEB RESOURCES**

876

877 The URLs for data presented herein are as follows:

878 UCSC Genome Browser, <https://genome.ucsc.edu/>

879 UCSCXenaShiny, <https://cran.r-project.org/web/packages/UCSCXenaShiny/index.html>

880 GTEx Portal, <https://www.gtexportal.org/>

881 GEPIA2, <http://gepia2.cancer-pku.cn/#index>

882 MITOMAP, <https://mitomap.org/foswiki/bin/view/MITOMAP/WebHome>

883 R software package, <http://www.R-project.org>

## 884 **SUPPLEMENTARY TABLES**

885

886 Table S1. Mitochondrial Protein-Coding Genes Location and eSNVs

887 Table S2. Primary Tissues Available by GTEx

888 Table S3. Types of Cancers in the TCGA

889 Table S4. Differentially Expressed Genes for mtDNA protein-coding genes in all tissues from GTEx  
890 and TCGA

891 Table S5. Female Expression of mtDNA Protein-coding Genes Across Different Ages for each Tissue.

892 Table S6. Male Expression of mtDNA Protein-coding Genes Across Different Ages for each Tissue.

893 Table S7. Comparison of Mitochondrial Polymorphic Sites Expression by Gender in 20-49 years

894 Table S8. Comparison of Mitochondrial Polymorphic Sites Expression by Gender in 50-59 years

895 Table S9. Comparison of Mitochondrial Polymorphic Sites Expression by Gender in 60-79 years

896 Table S10. Survival Map of 13 Mitochondrial Protein-Coding Genes in Different Cancers

897 Table S11. Overall Survival Expression Profile of 4-component Gene Downregulated Signatures in  
898 LGG

899 Table S12. Disease-specific-survival Expression Profile of 4-component Gene Downregulated Signatures in  
900 LGG

901 Table S13. Progression-free-interval Expression Profile of 4-component Gene Downregulated  
902 Signatures in LGG

903 Table S14. Overall Survival Expression Profile of 4-component Gene Downregulated Signatures in  
904 LGG for Males

905 Table S15. Overall Survival Expression Profile of 4-component Gene Downregulated Signatures in  
906 LGG for Females

907 Table S16. Progression-free-interval Expression Profile of 4-component Gene Downregulated  
908 Signatures in LGG for Females

909 Table S17. Progression-free-interval Expression Profile of 4-component Gene Downregulated  
910 Signatures in LGG for Males

911 Table S18. Disease-specific-survival Expression Profile of 4-component Gene Downregulated  
912 Signatures in LGG for Females

913 Table S19. Disease-specific-survival Expression Profile of 4-component Gene Downregulated  
914 Signatures in LGG for Males

915 Table S20. Disease-free-interval Expression Profile of 4-component Gene Downregulated Signatures in  
916 LGG for Males

917 Table S21. Disease-free-interval Expression Profile of 4-component Gene Downregulated Signatures in  
918 LGG for Females

919 Table S22. Mitochondrial Protein-Coding Genes Profile for Protective or Risk Effect on Survival in  
920 Different Cancers

921 Table S23. Association Between Molecular Profile of 13 Mitochondrial Protein-Coding Genes and  
922 Immune Cells Infiltrate Signatures

923 Table S24. Correlations Between the Expression Profiles of the 7-component Gene Signature and  
924 Immune Cell infiltrates

925 Table S25. Correlations Between the Expression Profiles of the 8-component Gene Signature and  
926 Immune Cell infiltrates

927 Table S26. Correlations Between the Expression Profiles of the 4-component Gene Signature and  
928 Immune Cell infiltrates

929 Table S26. Correlations Between the Molecular Profile of 13 Mitochondrial Protein-Coding Genes and  
930 Stemness

931

## 932 SUPPLEMENTARY FIGURES

933

934 **Supplementary Figure 1. The landscape of Mitochondrial Protein-Coding Genes and**  
935 **Polymorphic Sites distribution Across all Samples and Tissues.**

936

937 **Supplementary Figure 2. Kaplan-Meier plot of overall survival outcome in low-grade glioma.** The  
938 curves denote the contribution of the 4-component gene signature (*MT-CO1*, *MT-CO2*, *MT-ND5*, *MT-*  
939 *ND6*) to the overall survival outcome in patients from the low (blue – downregulated) and high (red –  
940 upregulated) expression groups. The censoring number refers to patients who did not suffer the outcome  
941 of interest during the specified study period. The overexpression of the signature has a more significant  
942 prognostic factor value.

943

944 **Supplementary Figure 3. Kaplan-Meier plot of overall survival outcome in low-grade glioma.** The  
945 curves denote the contribution of the 4-component gene signature (*MT-CO1*, *MT-CO2*, *MT-ND5*, *MT-*  
946 *ND6*), in males, to the overall survival outcome in patients from the low (blue – downregulated) and high  
947 (red – upregulated) expression groups. The censoring number refers to patients who did not suffer the  
948 outcome of interest during the specified study period. The overexpression of the signature has a more  
949 significant prognostic factor value.

950

951 **Supplementary Figure 4. Kaplan-Meier plot of disease-specific survival outcome in low-grade**  
952 **glioma.** The curves denote the contribution of the 4-component gene signature (*MT-CO1*, *MT-CO2*, *MT-*  
953 *ND5*, *MT-ND6*), in females, to the disease-specific survival outcome in patients from the low (blue –  
954 downregulated) and high (red – upregulated) expression groups. The censoring number refers to patients  
955 who did not suffer the outcome of interest during the specified study period. The overexpression of the  
956 signature has a more significant prognostic factor value.

957

958 **Supplementary Figure 5. Kaplan-Meier plot of disease-specific survival outcome in low-grade**  
959 **glioma.** The curves denote the contribution of the 4-component gene signature (*MT-CO1*, *MT-CO2*, *MT-*  
960 *ND5*, *MT-ND6*), in males, to the disease-specific survival outcome in patients from the low (blue –  
961 downregulated) and high (red – upregulated) expression groups. The censoring number refers to patients  
962 who did not suffer the outcome of interest during the specified study period. The overexpression of the  
963 signature has a more significant prognostic factor value.

964

965 **Supplementary Figure 6. Kaplan-Meier plot of progression-free-interval outcome in low-grade**  
966 **glioma.** The curves denote the contribution of the 4-component gene signature (*MT-CO1*, *MT-CO2*, *MT-*  
967 *ND5*, *MT-ND6*), in females, to the progression-free-interval outcome in patients from the low (blue –  
968 downregulated) and high (red – upregulated) expression groups. The censoring number refers to patients  
969 who did not suffer the outcome of interest during the specified study period. The overexpression of the  
970 signature has a more significant prognostic factor value.

971

972 **Supplementary Figure 7. Kaplan-Meier plot of progression-free-interval outcome in low-grade**  
973 **glioma.** The curves denote the contribution of the 4-component gene signature (*MT-CO1*, *MT-CO2*, *MT-*  
974 *ND5*, *MT-ND6*), in males, to the progression-free-interval outcome in patients from the low (blue –  
975 downregulated) and high (red – upregulated) expression groups. The censoring number refers to patients  
976 who did not suffer the outcome of interest during the specified study period. The overexpression of the  
977 signature has a more significant prognostic factor value.

978

979 **Supplementary Figure 8. Kaplan-Meier plot of disease-free interval outcome in low-grade glioma**  
980 **in females.** The curves denote the contribution of the 4-component gene signature (*MT-CO1*, *MT-CO2*,  
981 *MT-ND5*, *MT-ND6*) to the disease-free interval outcome in female patients from the low (blue –  
982 downregulated) and high (red – upregulated) expression groups. The censoring number refers to patients  
983 who did not suffer the outcome of interest during the specified study period, and the downregulation of  
984 the signature has a more significant prognostic factor value.

985  
986 **Supplementary Figure 9. Kaplan-Meier plot of disease-free interval outcome in low-grade glioma.**  
987 The curves denote the contribution of the 4-component gene signature (*MT-CO1*, *MT-CO2*, *MT-ND5*,  
988 *MT-ND6*), in males, to the disease-free interval outcome in patients from the low (blue – downregulated)  
989 and high (red – upregulated) expression groups. The censoring number refers to patients who did not  
990 suffer the outcome of interest during the specified study period. The overexpression of the signature has  
991 a more significant prognostic factor value.

992  
993  
994 **Supplementary Figure 19. Heatmap of the correlations between the expression profiles of the 7-**  
995 **component gene signature and immune cell infiltrates.** The red-blue heatmap scale shows the  
996 significance levels of Spearman correlation coefficients (\*\*\*, \*\*, \*). In THYM, the 7-component gene  
997 signature is positively correlated with infiltrates of endothelial cells, neutrophils, myeloid dendritic cells,  
998 T cell CD4+, and macrophage M2 ( $\rho \geq 0.50$ , p-value  $\leq 0.001$ ).

999  
1000 **Supplementary Figure 11. Heatmap of the correlations between the expression profiles of the 8-**  
1001 **component gene signature and immune cell infiltrates.** The red-blue heatmap scale shows the  
1002 significance levels of Spearman correlation coefficients (\*\*\*, \*\*, \*). In THYM, the 7-component gene  
1003 signature is negatively correlated with infiltrates of T cell CD4+ Th1, T cell, and T cell regulatory (Tregs)  
1004 ( $\rho \leq -0.5$ , p-value  $\leq 3.05e-10$ ).

1005  
1006  
1007  
1008  
1009

## 1010 **DRIVE ACCESS FOR SUPPLEMENTARY DATA**

1011  
1012 [https://drive.google.com/drive/folders/1JggbN51c0xpeUNrDJugP4yCqersz\\_F0?usp=sharing](https://drive.google.com/drive/folders/1JggbN51c0xpeUNrDJugP4yCqersz_F0?usp=sharing)

1013  
1014  
1015  
1016

## 1017 **CONFLICT OF INTEREST**

1018 The authors declare that the research was conducted without any commercial or financial relationships  
1019 that could be construed as potential conflicts of interest.

1020



1021 **FUNDING**

1022

1023 This work was supported by grants from the Fundação de Amparo à Pesquisa do Estado do Rio de  
1024 Janeiro – FAPERJ (BR) (<http://www.faperj.br/>) [grant number E26/010.001036/2015 to EM-A], and  
1025 from the Conselho Nacional de Desenvolvimento Científico e Tecnológico – CNPq (BR)  
1026 (<http://cnpq.br/>) [grant numbers 301034/2012-5 and 308780/2015-9 to EM-A]. ATS received a  
1027 graduate fellowship from FAPERJ/UENF, and FBM received a postdoctoral fellowship from  
1028 CAPES/PADCT. The agencies had no role in the study design, data collection, analysis, publication  
1029 decision, or manuscript preparation.

1030 **Acknowledgments**

1031 The authors wish to thank the members of the Medina-Acosta laboratory for their insights and  
1032 productive lab brainstorming meetings.

## 1033 **Figure Legends**

1034

1035 **Figure 1. Balloon plot of the differential expressed mitochondrial protein-coding genes in normal**  
1036 **versus cancer tissues.** Balloon size refers to the average expression (norm\_counts); blue color  
1037 intensity refers to the Log2FC. Overexpression (+); underexpression (-). X-axis: the 13 mitochondrial  
1038 protein-coding genes; Y-axis, FDR (-log10). The tissues are indicated in each box.

1039

1040 **Figure 2. Heatmap of significant mitochondrial protein-coding gene expression across different**  
1041 **ages for each tissue in males.** The expression of all mitochondrial protein-coding genes was measured  
1042 using RPKM (reads per kilobase million), and the color scale denotes the level of significance of gene  
1043 expression in each tissue. The different ages consisted of three groups (20-49 years; 50-59 years, and  
1044 60-79 years). The significance level was measured based on the Tukey test and the FDR adjustment,  
1045 Benjamin-Hochberg.

1046

1047 **Figure 3. Heatmap of significant mitochondrial protein-coding gene expression across different**  
1048 **ages for each tissue in females.** The expression of all mitochondrial protein-coding genes was  
1049 measured using RPKM (reads per kilobase million), and the color scale denotes the level of  
1050 significance of gene expression in each tissue. The different ages consisted of three groups (20-49  
1051 years; 50-59 years, and 60-79 years). The significance level was measured based on the Tukey test and  
1052 the FDR adjustment, Benjamin-Hochberg.

1053

1054 **Figure 4. Heatmap of significant mitochondrial protein-coding gene expression between sexes in**  
1055 **20-49-year-old group.** All mitochondrial protein-coding genes were measured between the sexes  
1056 (female and male) using RPKM (reads per kilobase million) across different tissues, and the color scale  
1057 denotes the level of significance of gene expression in each tissue. The sex-specific tissue samples  
1058 were excluded, and the significance level was measured based on the Wilcox test and the FDR  
1059 adjustment, Benjamin-Hochberg.

1060

1061 **Figure 5. Heatmap of significant mitochondrial protein-coding gene expression between sexes in**  
1062 **50-59-year-old group.** All mitochondrial protein-coding genes were measured between the sexes  
1063 (female and male) using RPKM (reads per kilobase million) across different tissues, and the color scale  
1064 denotes the level of significance of gene expression in each tissue. The sex-specific tissue samples  
1065 were excluded, and the significance level was measured based on the Wilcox test and the FDR  
1066 adjustment, Benjamin-Hochberg.

1067

1068 **Figure 6. Heatmap of significant mitochondrial protein-coding gene expression between sexes in**  
1069 **60-79-year-old group.** All mitochondrial protein-coding genes were measured between the sexes  
1070 (female and male) using RPKM (reads per kilobase million) across different tissues, and the color scale  
1071 denotes the level of significance of gene expression in each tissue. The sex-specific tissue samples  
1072 were excluded, and the significance level was measured based on the Wilcox test and the FDR  
1073 adjustment, Benjamin-Hochberg.

1074

1075 **Figure 7. Boxplot of mitochondrial polymorphic site expression in females across tissues at**  
1076 **different age groups.** The polymorphic site expression at the mitochondrial protein-coding genes was  
1077 measured using RPKM (reads per kilobase million) in three age groups, 20-49 years (red), 50-59 years  
1078 (green), and 60-79 years (blue). The Tukey test and the FDR adjustment, Benjamin-Hochberg assessed  
1079 significant differences between age groups.

1080

1081 **Figure 8. Boxplot of mitochondrial polymorphic site expression in males across tissues at**  
1082 **different age groups.** The polymorphic site expression at the mitochondrial protein-coding genes was  
1083 measured using RPKM (reads per kilobase million) in three age groups, 20-49 years (red), 50-59 years  
1084 (green), and 60-79 years (blue). The Tukey test and the FDR adjustment, Benjamini-Hochberg assessed  
1085 significant differences between age groups.

1086  
1087  
1088 **FIGURE 9. Overall survival heatmap for the 13 mitochondrial protein-coding genes.** Squares  
1089 denote overall survival associated with overexpression (red) or under-expression (blue). Highlighted  
1090 frames indicate significant associations with overall survival outcomes based on hazard ratios  
1091 (logarithmic scale log<sub>10</sub>). Y-axis: mitochondrial genes (Ensemble transcripts and UCSCXena names),  
1092 X-axis: pan-cancer types. The under-expression profiles of the MT-CO1, MT-CO2, MT-ND5, and MT-  
1093 ND6 genes have a significant overall survival risk in LGG (hazard ratio range 0.41-0.51, Logrank p  
1094 ≤0.00026, p(HR) ≤0.00033), while the under-expression of the MT-CO3 gene is a hazard risk in PAAD  
1095 (hazard ratio 0.45, p(HR)=0.00022, Logrank p=0.00017).

1096  
1097  
1098 **FIGURE 10. Kaplan-Meier plot of overall survival outcome in low-grade glioma.** The curves  
1099 denote the contribution of the 4-component gene signature (*MT-CO1*, *MT-CO2*, *MT-ND5*, *MT-ND6*)  
1100 to the overall survival outcome in patients from the low (blue – downregulated) and high (red –  
1101 upregulated) expression groups. The censoring number refers to patients who did not suffer the  
1102 outcome of interest during the specified study period. The overexpression of the signature has a more  
1103 significant prognostic factor value.

1104  
1105  
1106 **FIGURE 11. Kaplan-Meier plot of disease-specific outcome in low-grade glioma.** The curves  
1107 denote the contribution of the 4-component gene signature (*MT-CO1*, *MT-CO2*, *MT-ND5*, *MT-ND6*)  
1108 to the disease-specific outcome in patients from the low (blue – downregulated) and high (red –  
1109 upregulated) expression groups. The censoring number refers to patients who did not suffer the  
1110 outcome of interest during the specified study period. The overexpression of the signature has a more  
1111 significant prognostic factor value.

1112  
1113 **FIGURE 12. Kaplan-Meier plot of progression-free-interval outcome in low-grade glioma.** The  
1114 curves denote the contribution of the 4-component gene signature (*MT-CO1*, *MT-CO2*, *MT-ND5*, *MT-  
1115 ND6*) to the progression-free-interval outcome in patients from the low (blue – downregulated) and  
1116 high (red – upregulated) expression groups. The censoring number refers to patients who did not suffer  
1117 the outcome of interest during the specified study period. The overexpression of the signature has a  
1118 more significant prognostic factor value.

1119  
1120  
1121 **FIGURE 13. Boxplot of the molecular profile of mitochondrial protein-coding genes for**  
1122 **protective or risk effects based on hazard ratio.** Cox model analysis for the 4-component gene  
1123 signature (*MT-CO1*, *MT-CO2*, *MT-ND5*, *MT-ND6*) in 33 cancer types. The signature is protective (red)  
1124 in *LGG*, *ACC*, *KICH*, *KIRP*, *LIHC*, and *PAAD* cancers (p-value < 0.0113) or risk (blue) in *THYM* and  
1125 *UCEC* cancers (p-value < 0.0465).

1126  
1127 **FIGURE 14. Heatmap of the correlations between the expression profiles of the 13-component**  
1128 **gene signature and immune cell infiltrates.** The red-blue heatmap scale shows the Spearman

1129 correlation coefficients' significance levels (\*\*\*, \*\*, \*). In DBLC, the 13-component gene signature is  
1130 positively correlated with infiltrates of neutrophil, NK, T-cell CD4 memory, M1/M2 macrophages, T-  
1131 cell CD8+/CD4+, and B-cell memory cells ( $\rho \geq 0.50$  p-value  $< 0.0003$ ).

1132

1133

1134 **FIGURE 15. Heatmap of the correlations between the expression profiles of the 4-component**  
1135 **gene signature and immune cell infiltrates.** The red-blue heatmap scale shows the Spearman  
1136 correlation coefficients' significance levels (\*\*\*, \*\*, \*). In LGG, the 4-component gene signature is  
1137 positively correlated with monocyte, NK, and B cell infiltrates ( $\rho > 0.3$ , p-value  $< 2.01e-12$ ).

1138

1139

1140 **FIGURE 16. Heatmap of the correlations between the expression profiles of the 4-component**  
1141 **gene signature and immune cell infiltrates.** The red-blue heatmap scale shows the Spearman  
1142 correlation coefficients' significance levels (\*\*\*, \*\*, \*). In LGG, the 4-component gene signature is  
1143 negatively correlated with T cell CD4+ Th2, macrophage M1 and M2, myeloid dendritic cell,  
1144 neutrophil, and activated myeloid dendritic cell activated cell infiltrates ( $\rho \leq 0.3$ , p-value  $< 2.26E-$   
1145  $12$ ).

1146

1147 **FIGURE 17. Radar plot for the correlation coefficients between the 13-component gene**  
1148 **signatures and stemness in 33 cancer types.** Shown is the distribution of the breadth of the Spearman  
1149 correlation coefficients, where the association can be positive (+1), negative (-1), or neutral (0). The  
1150 more significant positive correlation with stemness occurred in KICH and LAML.

1151

1152

1153

1154

1155

1156

## 1157 REFERENCES

- 1158  
1159  
1160 Allaire, J.J.B., Ma (2012). RStudio: integrated development environment for R. *770*, 165-171.  
1161 Ansell, S.M., Stenson, M., Habermann, T.M., Jelinek, D.F., and Witzig, T.E. (2001). Cd4+ T-cell  
1162 immune response to large B-cell non-Hodgkin's lymphoma predicts patient outcome. *J Clin*  
1163 *Oncol* 19, 720-726.  
1164 Berchtold, N.C., Cribbs, D.H., Coleman, P.D., Rogers, J., Head, E., Kim, R., Beach, T., Miller, C.,  
1165 Troncoso, J., Trojanowski, J.Q., Zielke, H.R., and Cotman, C.W. (2008). Gene expression  
1166 changes in the course of normal brain aging are sexually dimorphic. *Proc Natl Acad Sci U S A*  
1167 105, 15605-15610.  
1168 Breton, S., Milani, L., Ghiselli, F., Guerra, D., Stewart, D.T., and Passamonti, M. (2014). A  
1169 resourceful genome: updating the functional repertoire and evolutionary role of animal  
1170 mitochondrial DNAs. *Trends Genet* 30, 555-564.  
1171 Cai, J.L., Zhu, G.Q., Du, J.X., Wang, B., Wan, J.L., Xiao, K., and Dai, Z. (2021). Identification and  
1172 validation of a new gene signature predicting prognosis of hepatocellular carcinoma patients  
1173 by network analysis of stemness indices. *Expert Rev Gastroenterol Hepatol* 15, 699-709.  
1174 Calloway, C.D., Reynolds, R.L., Herrin, G.L., Jr., and Anderson, W.W. (2000). The frequency of  
1175 heteroplasmy in the HVII region of mtDNA differs across tissue types and increases with age.  
1176 *Am J Hum Genet* 66, 1384-1397.  
1177 Capt, C., Passamonti, M., and Breton, S. (2016). The human mitochondrial genome may code for  
1178 more than 13 proteins. *Mitochondrial DNA Part A* 27, 3098-3101.  
1179 Chen, J., Li, Y., Han, X., Pan, Y., and Qian, X. (2021). An autophagic gene-based signature to  
1180 predict the survival of patients with low-grade gliomas. *Cancer Med* 10, 1848-1859.  
1181 Da Silva Francisco Junior, R., Dos Santos Ferreira, C., Santos, E.S.J.C., Terra Machado, D., Cortes  
1182 Martins, Y., Ramos, V., Simoes Carnivali, G., Garcia, A.B., and Medina-Acosta, E. (2019).  
1183 Pervasive Inter-Individual Variation in Allele-Specific Expression in Monozygotic Twins.  
1184 *Front Genet* 10, 1178.  
1185 De Magalhaes, J.P., Curado, J., and Church, G.M. (2009). Meta-analysis of age-related gene  
1186 expression profiles identifies common signatures of aging. *Bioinformatics* 25, 875-881.  
1187 Droge, W. (2002). Free radicals in the physiological control of cell function. *Physiol Rev* 82, 47-95.  
1188 Ellegren, H., and Parsch, J. (2007). The evolution of sex-biased genes and sex-biased gene  
1189 expression. *Nat Rev Genet* 8, 689-698.  
1190 Faure, E., Delaye, L., Tribolo, S., Levasseur, A., Seligmann, H., and Barthelemy, R.M. (2011).  
1191 Probable presence of an ubiquitous cryptic mitochondrial gene on the antisense strand of the  
1192 cytochrome oxidase I gene. *Biol Direct* 6, 56.  
1193 Foster, L.J., De Hoog, C.L., Zhang, Y., Zhang, Y., Xie, X., Mootha, V.K., and Mann, M. (2006). A  
1194 mammalian organelle map by protein correlation profiling. *Cell* 125, 187-199.  
1195 Frenk, S., and Houseley, J. (2018). Gene expression hallmarks of cellular ageing. *Biogerontology* 19,  
1196 547-566.  
1197 Gao, Z., Zhang, D., Duan, Y., Yan, L., Fan, Y., Fang, Z., and Liu, Z. (2019). A five-gene signature  
1198 predicts overall survival of patients with papillary renal cell carcinoma. *PLOS ONE* 14,  
1199 e0211491.  
1200 Gemmell, N.J., Metcalf, V.J., and Allendorf, F.W. (2004). Mother's curse: the effect of mtDNA on  
1201 individual fitness and population viability. *Trends Ecol Evol* 19, 238-244.  
1202 Geromel, V., Kadhom, N., Cebalos-Picot, I., Ouari, O., Polidori, A., Munnich, A., Rotig, A., and  
1203 Rustin, P. (2001). Superoxide-induced massive apoptosis in cultured skin fibroblasts



- 1204 harboring the neurogenic ataxia retinitis pigmentosa (NARP) mutation in the ATPase-6 gene  
1205 of the mitochondrial DNA. *Hum Mol Genet* 10, 1221-1228.
- 1206 Gershoni, M., and Pietrokovski, S. (2017). The landscape of sex-differential transcriptome and its  
1207 consequent selection in human adults. *BMC Biol* 15, 7.
- 1208 Guo, J.C., Wei, Q.S., Dong, L., Fang, S.S., Li, F., and Zhao, Y. (2021). Prognostic Value of an  
1209 Autophagy-Related Five-Gene Signature for Lower-Grade Glioma Patients. *Front Oncol* 11,  
1210 644443.
- 1211 Gustafsson, C.M., Falkenberg, M., and Larsson, N.G. (2016). Maintenance and Expression of  
1212 Mammalian Mitochondrial DNA. *Annu Rev Biochem* 85, 133-160.
- 1213 Harman, D. (1992a). Free radical theory of aging. *Mutat Res* 275, 257-266.
- 1214 Harman, D. (1992b). Free radical theory of aging: history. *EXS* 62, 1-10.
- 1215 Harman, D. (1993). Free radical involvement in aging. Pathophysiology and therapeutic implications.  
1216 *Drugs Aging* 3, 60-80.
- 1217 He, Y., Wu, J., Dressman, D.C., Iacobuzio-Donahue, C., Markowitz, S.D., Velculescu, V.E., Diaz,  
1218 L.A., Jr., Kinzler, K.W., Vogelstein, B., and Papadopoulos, N. (2010). Heteroplasmic  
1219 mitochondrial DNA mutations in normal and tumour cells. *Nature* 464, 610-614.
- 1220 Hong, L., Zhou, Y., Xie, X., Wu, W., Shi, C., Lin, H., and Shi, Z. (2021). A stemness-based eleven-  
1221 gene signature correlates with the clinical outcome of hepatocellular carcinoma. *BMC Cancer*  
1222 21, 716.
- 1223 Huang, X.Y., Qin, W.T., Su, Q.S., Qiu, C.C., Liu, R.C., Xie, S.S., Hu, Y., and Zhu, S.Y. (2021). A  
1224 New Stemness-Related Prognostic Model for Predicting the Prognosis in Pancreatic Ductal  
1225 Adenocarcinoma. *Biomed Res Int* 2021, 6669570.
- 1226 Iacobellis, G. (2021). Aging Effects on Epicardial Adipose Tissue. *Front Aging* 2, 666260.
- 1227 Iglesia, M.D., Parker, J.S., Hoadley, K.A., Serody, J.S., Perou, C.M., and Vincent, B.G. (2016).  
1228 Genomic Analysis of Immune Cell Infiltrates Across 11 Tumor Types. *J Natl Cancer Inst*  
1229 108.
- 1230 Kassam, I., Qi, T., Lloyd-Jones, L., Holloway, A., Jan Bonder, M., Henders, A.K., Martin, N.G.,  
1231 Powell, J.E., Franke, L., Montgomery, G.W., Visscher, P.M., and Mcrae, A.F. (2016).  
1232 Evidence for mitochondrial genetic control of autosomal gene expression. *Hum Mol Genet*  
1233 25, 5332-5338.
- 1234 Keane, C., Gill, D., Vari, F., Cross, D., Griffiths, L., and Gandhi, M. (2013). CD4(+) tumor  
1235 infiltrating lymphocytes are prognostic and independent of R-IPi in patients with DLBCL  
1236 receiving R-CHOP chemo-immunotherapy. *Am J Hematol* 88, 273-276.
- 1237 Keane, C., Vari, F., Hertzberg, M., Cao, K.A., Green, M.R., Han, E., Seymour, J.F., Hicks, R.J., Gill,  
1238 D., Crooks, P., Gould, C., Jones, K., Griffiths, L.R., Talaulikar, D., Jain, S., Tobin, J., and  
1239 Gandhi, M.K. (2015). Ratios of T-cell immune effectors and checkpoint molecules as  
1240 prognostic biomarkers in diffuse large B-cell lymphoma: a population-based study. *Lancet*  
1241 *Haematol* 2, e445-455.
- 1242 Kim, G.E., Kim, N.I., Lee, J.S., Park, M.H., and Kang, K. (2020). Differentially Expressed Genes in  
1243 Matched Normal, Cancer, and Lymph Node Metastases Predict Clinical Outcomes in Patients  
1244 With Breast Cancer. *Appl Immunohistochem Mol Morphol* 28, 111-122.
- 1245 Kim, S., Myers, L., Ravussin, E., Cherry, K.E., and Jazwinski, S.M. (2016). Single nucleotide  
1246 polymorphisms linked to mitochondrial uncoupling protein genes UCP2 and UCP3 affect  
1247 mitochondrial metabolism and healthy aging in female nonagenarians. *Biogerontology* 17,  
1248 725-736.
- 1249 Kirches, E., Michael, M., Warich-Kirches, M., Schneider, T., Weis, S., Krause, G., Mawrin, C., and  
1250 Dietzmann, K. (2001). Heterogeneous tissue distribution of a mitochondrial DNA

- 1251 polymorphism in heteroplasmic subjects without mitochondrial disorders. *J Med Genet* 38,  
1252 312-317.
- 1253 Kirkwood, T.B.a.A., S.N. (2000). Why do we age? *Nature (Lond)* 408.
- 1254 Kopsidas, G., Zhang, C., Yarovaya, N., Kovalenko, S., Graves, S., Richardson, M., and Linnane,  
1255 A.W. (2002). Stochastic mitochondrial DNA changes: bioenergy decline in type I skeletal  
1256 muscle fibres correlates with a decline in the amount of amplifiable full-length mtDNA.  
1257 *Biogerontology* 3, 29-36.
- 1258 Larsson Ng, W.J., Wilhelmsson H, Oldfors a, Rustin P, Et Al. (1998). Mitochondrial transcription  
1259 factor A is necessary for mtDNA maintenance and embryogenesis in mice. *Nat. Genet* 18.
- 1260 Lee, C., Yen, K., and Cohen, P. (2013). Humanin: a harbinger of mitochondrial-derived peptides?  
1261 *Trends Endocrinol Metab* 24, 222-228.
- 1262 Li, N., Zhao, J., Ma, Y., Roy, B., Liu, R., Kristiansen, K., and Gao, Q. (2018). Dissecting the  
1263 expression landscape of mitochondrial genes in lung squamous cell carcinoma and lung  
1264 adenocarcinoma. *Oncol Lett* 16, 3992-4000.
- 1265 Li, W., Lu, J., Ma, Z., Zhao, J., and Liu, J. (2019). An Integrated Model Based on a Six-Gene  
1266 Signature Predicts Overall Survival in Patients With Hepatocellular Carcinoma. *Front Genet*  
1267 10, 1323.
- 1268 Li, X., Wen, D., Li, X., Yao, C., Chong, W., and Chen, H. (2020). Identification of an Immune  
1269 Signature Predicting Prognosis Risk and Lymphocyte Infiltration in Colon Cancer. *Front*  
1270 *Immunol* 11, 1678.
- 1271 Lin, J.Z., and Lin, N. (2021). A risk signature of three autophagy-related genes for predicting lower  
1272 grade glioma survival is associated with tumor immune microenvironment. *Genomics* 113,  
1273 767-777.
- 1274 Linnane Aw, M.S., Ozawa T, and Tanaka M. (1989). Mitochondrial DNA mutations as an important  
1275 contributor to ageing and degenerative diseases. *Lancet* 1.
- 1276 Liu, J., and Li, G. (2021). Identification and validation of a risk signature based on extracellular  
1277 matrix-related genes in gliomas. *Medicine (Baltimore)* 100, e25603.
- 1278 Lopes-Ramos, C.M., Chen, C.Y., Kuijjer, M.L., Paulson, J.N., Sonawane, A.R., Fagny, M., Platig, J.,  
1279 Glass, K., Quackenbush, J., and Demeo, D.L. (2020). Sex Differences in Gene Expression  
1280 and Regulatory Networks across 29 Human Tissues. *Cell Rep* 31, 107795.
- 1281 Malta, T.M., Sokolov, A., Gentles, A.J., Burzykowski, T., Poisson, L., Weinstein, J.N., Kaminska,  
1282 B., Huelsken, J., Omberg, L., Gevaert, O., Colaprico, A., Czerwinska, P., Mazurek, S.,  
1283 Mishra, L., Heyn, H., Krasnitz, A., Godwin, A.K., Lazar, A.J., Cancer Genome Atlas  
1284 Research, N., Stuart, J.M., Hoadley, K.A., Laird, P.W., Noushmehr, H., and Wiznerowicz, M.  
1285 (2018). Machine Learning Identifies Stemness Features Associated with Oncogenic  
1286 Dedifferentiation. *Cell* 173, 338-354 e315.
- 1287 Manfroi, B., Moreaux, J., Righini, C., Ghiringhelli, F., Sturm, N., and Huard, B. (2018). Tumor-  
1288 associated neutrophils correlate with poor prognosis in diffuse large B-cell lymphoma  
1289 patients. *Blood Cancer J* 8, 66.
- 1290 Mele, M., Ferreira, P.G., Reverter, F., Deluca, D.S., Monlong, J., Sammeth, M., Young, T.R.,  
1291 Goldmann, J.M., Pervouchine, D.D., Sullivan, T.J., Johnson, R., Segre, A.V., Djebali, S.,  
1292 Niarchou, A., Consortium, G.T., Wright, F.A., Lappalainen, T., Calvo, M., Getz, G.,  
1293 Dermitzakis, E.T., Ardlie, K.G., and Guigo, R. (2015). Human genomics. The human  
1294 transcriptome across tissues and individuals. *Science* 348, 660-665.
- 1295 Miquel, J., Economos, A.C., Fleming, J., and Johnson, J.E., Jr. (1980). Mitochondrial role in cell  
1296 aging. *Exp Gerontol* 15, 575-591.



- 1297 Mu, S., Ai, L., Fan, F., Qin, Y., Sun, C., and Hu, Y. (2018). Prognostic role of neutrophil-to-  
1298 lymphocyte ratio in diffuse large B cell lymphoma patients: an updated dose-response meta-  
1299 analysis. *Cancer Cell Int* 18, 119.
- 1300 Muller-Hocker, J. (1989). Cytochrome-c-oxidase deficient cardiomyocytes in the human heart--an  
1301 age-related phenomenon. A histochemical ultracytochemical study. *Am J Pathol* 134, 1167-  
1302 1173.
- 1303 Nagley, P., and Wei, Y.H. (1998). Ageing and mammalian mitochondrial genetics. *Trends in*  
1304 *Genetics* 14, 513-517.
- 1305 Naqvi, S., Godfrey, A.K., Hughes, J.F., Goodheart, M.L., Mitchell, R.N., and Page, D.C. (2019).  
1306 Conservation, acquisition, and functional impact of sex-biased gene expression in mammals.  
1307 *Science* 365.
- 1308 Ozawa, T. (1997). Genetic and functional changes in mitochondria associated with aging. *Physiol*  
1309 *Rev* 77, 425-464.
- 1310 Pan, X., Wang, Z., Liu, F., Zou, F., Xie, Q., Guo, Y., and Shen, L. (2021). A novel tailored immune  
1311 gene pairs signature for overall survival prediction in lower-grade gliomas. *Transl Oncol* 14,  
1312 101109.
- 1313 Papa, S. (1996). Mitochondrial oxidative phosphorylation changes in the lifespan. Molecular aspects  
1314 and physiopathological implications. *Biochim Biophys Acta*.
- 1315 Parsch, J., and Ellegren, H. (2013). The evolutionary causes and consequences of sex-biased gene  
1316 expression. *Nat Rev Genet* 14, 83-87.
- 1317 Pawar, A., Chowdhury, O.R., Chauhan, R., Talole, S., and Bhattacharjee, A. (2022). Identification of  
1318 key gene signatures for the overall survival of ovarian cancer. *Journal of Ovarian Research*  
1319 15, 12.
- 1320 Peters, M.J., Joehanes, R., Pilling, L.C., Schurmann, C., Conneely, K.N., Powell, J., Reinmaa, E.,  
1321 Sutphin, G.L., Zhernakova, A., Schramm, K., Wilson, Y.A., Kobes, S., Tukiainen, T.,  
1322 Consortium, N.U., Ramos, Y.F., Goring, H.H., Fornage, M., Liu, Y., Gharib, S.A., Stranger,  
1323 B.E., De Jager, P.L., Aviv, A., Levy, D., Murabito, J.M., Munson, P.J., Huan, T., Hofman, A.,  
1324 Uitterlinden, A.G., Rivadeneira, F., Van Rooij, J., Stolk, L., Broer, L., Verbiest, M.M.,  
1325 Jhamai, M., Arp, P., Metspalu, A., Tserel, L., Milani, L., Samani, N.J., Peterson, P., Kasela,  
1326 S., Codd, V., Peters, A., Ward-Caviness, C.K., Herder, C., Waldenberger, M., Roden, M.,  
1327 Singmann, P., Zeilinger, S., Illig, T., Homuth, G., Grabe, H.J., Volzke, H., Steil, L., Kocher,  
1328 T., Murray, A., Melzer, D., Yaghoobkar, H., Bandinelli, S., Moses, E.K., Kent, J.W., Curran,  
1329 J.E., Johnson, M.P., Williams-Blangero, S., Westra, H.J., Mcrae, A.F., Smith, J.A., Kardia,  
1330 S.L., Hovatta, I., Perola, M., Ripatti, S., Salomaa, V., Henders, A.K., Martin, N.G., Smith,  
1331 A.K., Mehta, D., Binder, E.B., Nylocks, K.M., Kennedy, E.M., Klengel, T., Ding, J., Suchy-  
1332 Dicey, A.M., Enquobahrie, D.A., Brody, J., Rotter, J.I., Chen, Y.D., Houwing-Duistermaat,  
1333 J., Kloppenburg, M., Slagboom, P.E., Helmer, Q., Den Hollander, W., Bean, S., Raj, T.,  
1334 Bakhshi, N., Wang, Q.P., Oyston, L.J., Psaty, B.M., Tracy, R.P., Montgomery, G.W., Turner,  
1335 S.T., et al. (2015). The transcriptional landscape of age in human peripheral blood. *Nat*  
1336 *Commun* 6, 8570.
- 1337 Poyton, R.O., and McEwen, J.E. (1996). Crosstalk between nuclear and mitochondrial genomes.  
1338 *Annual Review of Biochemistry* 65, 563-607.
- 1339 Quan, Q., Xiong, X., Wu, S., and Yu, M. (2021). Identification of Autophagy-Related Prognostic  
1340 Signature and Analysis of Immune Cell Infiltration in Low-Grade Gliomas. *Biomed Res Int*  
1341 2021, 7918693.
- 1342 Rao, S., Welsh, L., Cunningham, D., Te-Poele, R.H., Benson, M., Norman, A., Saffery, C., Giddings,  
1343 I., Workman, P., and Clarke, P.A. (2011). Correlation of overall survival with gene

- 1344 expression profiles in a prospective study of resectable esophageal cancer. *Clin Colorectal*  
1345 *Cancer* 10, 48-56.
- 1346 Reznik, E., Wang, Q., La, K., Schultz, N., and Sander, C. (2017). Mitochondrial respiratory gene  
1347 expression is suppressed in many cancers. *Elife* 6.
- 1348 Richter, C. (1995). Oxidative damage to mitochondrial DNA and its relationship to ageing. *Int J*  
1349 *Biochem Cell Biol* 27, 647-653.
- 1350 Rinn, J.L., and Snyder, M. (2005). Sexual dimorphism in mammalian gene expression. *Trends Genet*  
1351 21, 298-305.
- 1352 Santos, C., Sierra, B., Alvarez, L., Ramos, A., Fernandez, E., Nogues, R., and Aluja, M.P. (2008).  
1353 Frequency and pattern of heteroplasmy in the control region of human mitochondrial DNA. *J*  
1354 *Mol Evol* 67, 191-200.
- 1355 Scarpulla, R.C. (2008). Transcriptional paradigms in mammalian mitochondrial biogenesis and  
1356 function. *Physiol Rev* 88, 611-638.
- 1357 Schapira, A.H. (2006). Mitochondrial disease. *Lancet* 368, 70-82.
- 1358 Schopf, B., Weissensteiner, H., Schafer, G., Fazzini, F., Charoentong, P., Naschberger, A., Rupp, B.,  
1359 Fendt, L., Bukur, V., Giese, I., Sorn, P., Sant'anna-Silva, A.C., Iglesias-Gonzalez, J., Sahin,  
1360 U., Kronenberg, F., Gnaiger, E., and Klocker, H. (2020). OXPHOS remodeling in high-grade  
1361 prostate cancer involves mtDNA mutations and increased succinate oxidation. *Nat Commun*  
1362 11, 1487.
- 1363 Shokolenko, I., Venediktova, N., Bochkareva, A., Wilson, G.L., and Alexeyev, M.F. (2009).  
1364 Oxidative stress induces degradation of mitochondrial DNA. *Nucleic Acids Res* 37, 2539-  
1365 2548.
- 1366 Srinivasan, S., Guha, M., Kashina, A., and Avadhani, N.G. (2017). Mitochondrial dysfunction and  
1367 mitochondrial dynamics-The cancer connection. *Biochim Biophys Acta Bioenerg* 1858, 602-  
1368 614.
- 1369 Stenton, S.L., and Prokisch, H. (2020). Genetics of mitochondrial diseases: Identifying mutations to  
1370 help diagnosis. *EBioMedicine* 56, 102784.
- 1371 Stewart, J.B., and Chinnery, P.F. (2021). Extreme heterogeneity of human mitochondrial DNA from  
1372 organelles to populations. *Nat Rev Genet* 22, 106-118.
- 1373 Taylor, R.W., and Turnbull, D.M. (2005). Mitochondrial DNA mutations in human disease. *Nat Rev*  
1374 *Genet* 6, 389-402.
- 1375 Tower, J. (2017). Sex-Specific Gene Expression and Life Span Regulation. *Trends Endocrinol Metab*  
1376 28, 735-747.
- 1377 Van Den Akker, E.B., Passtoors, W.M., Jansen, R., Van Zwet, E.W., Goeman, J.J., Hulsman, M.,  
1378 Emilsson, V., Perola, M., Willemsen, G., Penninx, B.W., Heijmans, B.T., Maier, A.B.,  
1379 Boomsma, D.I., Kok, J.N., Slagboom, P.E., Reinders, M.J., and Beekman, M. (2014). Meta-  
1380 analysis on blood transcriptomic studies identifies consistently coexpressed protein-protein  
1381 interaction modules as robust markers of human aging. *Aging Cell* 13, 216-225.
- 1382 Van Oven, M., and Kayser, M. (2009). Updated comprehensive phylogenetic tree of global human  
1383 mitochondrial DNA variation. *Hum Mutat* 30, E386-394.
- 1384 Wallace, D.C. (1992). Diseases of the mitochondrial DNA. *Annu Rev Biochem* 61, 1175-1212.
- 1385 Wang, J., Ma, X., and Ma, J. (2022). Identification of Four Enhancer-Associated Genes as Risk  
1386 Signature for Diffuse Glioma Patients. *J Mol Neurosci* 72, 410-419.
- 1387 Welle, S., Brooks, A.I., Delehanty, J.M., Needler, N., and Thornton, C.A. (2003). Gene expression  
1388 profile of aging in human muscle. *Physiol Genomics* 14, 149-159.
- 1389 Xiao, K., Liu, Q., Peng, G., Su, J., Qin, C.Y., and Wang, X.Y. (2020a). Identification and validation  
1390 of a three-gene signature as a candidate prognostic biomarker for lower grade glioma. *PeerJ*  
1391 8, e8312.

- 1392 Xiao, L., Zou, G., Cheng, R., Wang, P., Ma, K., Cao, H., Zhou, W., Jin, X., Xu, Z., Huang, Y., Lin,  
1393 X., Nie, H., and Jiang, Q. (2021). Alternative splicing associated with cancer stemness in  
1394 kidney renal clear cell carcinoma. *BMC Cancer* 21, 703.
- 1395 Xiao, Y., Cui, G., Ren, X., Hao, J., Zhang, Y., Yang, X., Wang, Z., Zhu, X., Wang, H., Hao, C., and  
1396 Duan, H. (2020b). A Novel Four-Gene Signature Associated With Immune Checkpoint for  
1397 Predicting Prognosis in Lower-Grade Glioma. *Front Oncol* 10, 605737.
- 1398 Xu, H., Zou, R., Liu, J., and Zhu, L. (2021). A Risk Signature with Nine Stemness Index-Associated  
1399 Genes for Predicting Survival of Patients with Uterine Corpus Endometrial Carcinoma. *J*  
1400 *Oncol* 2021, 6653247.
- 1401 Yan, S., Fang, J., Chen, Y., Xie, Y., Zhang, S., Zhu, X., and Fang, F. (2020). Comprehensive analysis  
1402 of prognostic gene signatures based on immune infiltration of ovarian cancer. *BMC Cancer*  
1403 20, 1205.
- 1404 Ye, W., Luo, C., Liu, F., Liu, Z., and Chen, F. (2021). CD96 Correlates With Immune Infiltration and  
1405 Impacts Patient Prognosis: A Pan-Cancer Analysis. *Front Oncol* 11, 634617.
- 1406 Zhang, G.H., Zhong, Q.Y., Gou, X.X., Fan, E.X., Shuai, Y., Wu, M.N., and Yue, G.J. (2019). Seven  
1407 genes for the prognostic prediction in patients with glioma. *Clin Transl Oncol* 21, 1327-1335.
- 1408 Zhang, M., Wang, X., Chen, X., Zhang, Q., and Hong, J. (2020). Novel Immune-Related Gene  
1409 Signature for Risk Stratification and Prognosis of Survival in Lower-Grade Glioma. *Front*  
1410 *Genet* 11, 363.
- 1411 Zhang, Y., Peng, J., Du, H., Zhang, N., and Fang, X. (2021). Identification and Validation of  
1412 Immune- and Stemness-Related Prognostic Signature of Melanoma. *Front Cell Dev Biol* 9,  
1413 755284.
- 1414 Zhao, Y., Zhang, J., Wang, S., Jiang, Q., and Xu, K. (2021). Identification and Validation of a Nine-  
1415 Gene Amino Acid Metabolism-Related Risk Signature in HCC. *Front Cell Dev Biol* 9,  
1416 731790.
- 1417 Zhu, Y., Song, Z., Wang, Z., and Chen, G. (2022). Protective Prognostic Biomarkers Negatively  
1418 Correlated with Macrophage M2 Infiltration in Low-Grade Glioma. *J Oncol* 2022, 3623591.  
1419

Strata —+ group=Low —+ group=High

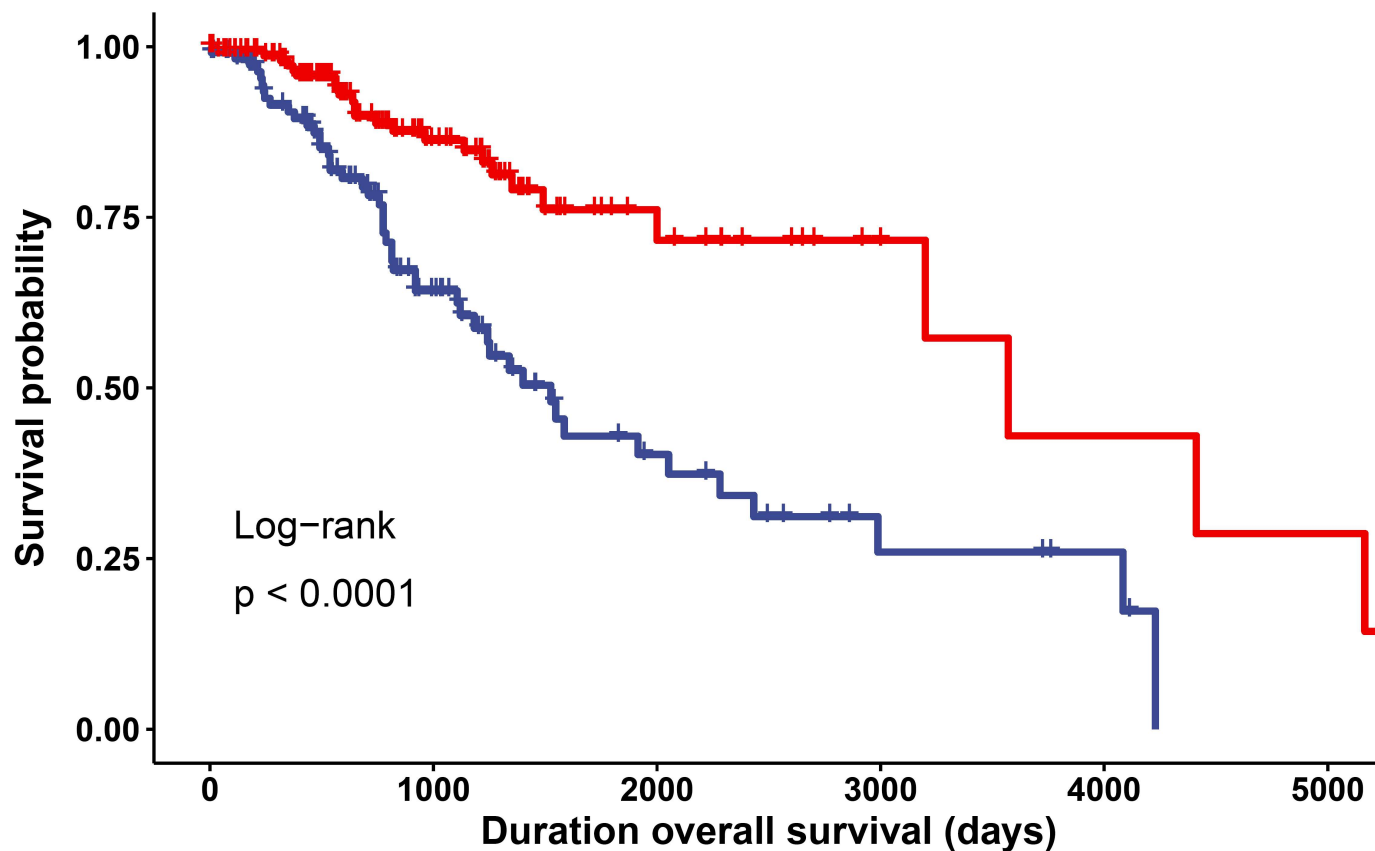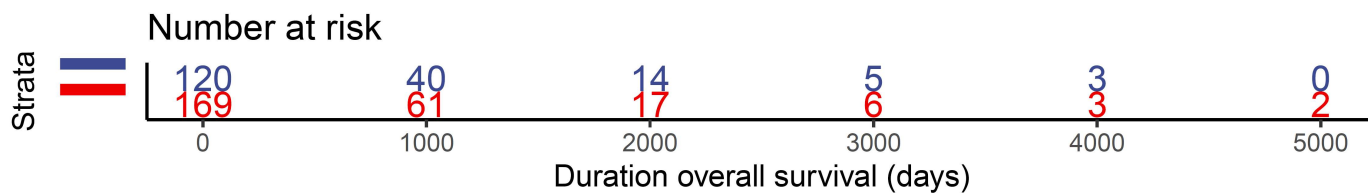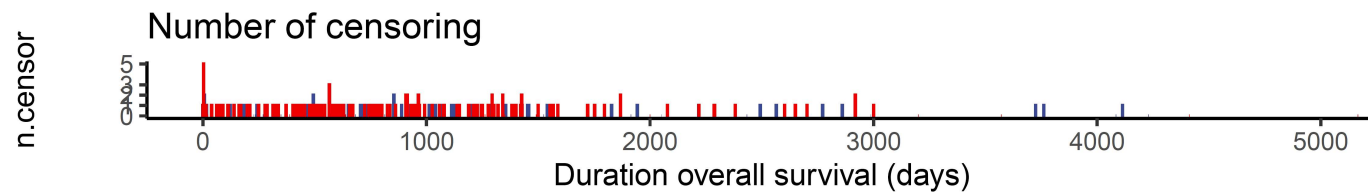

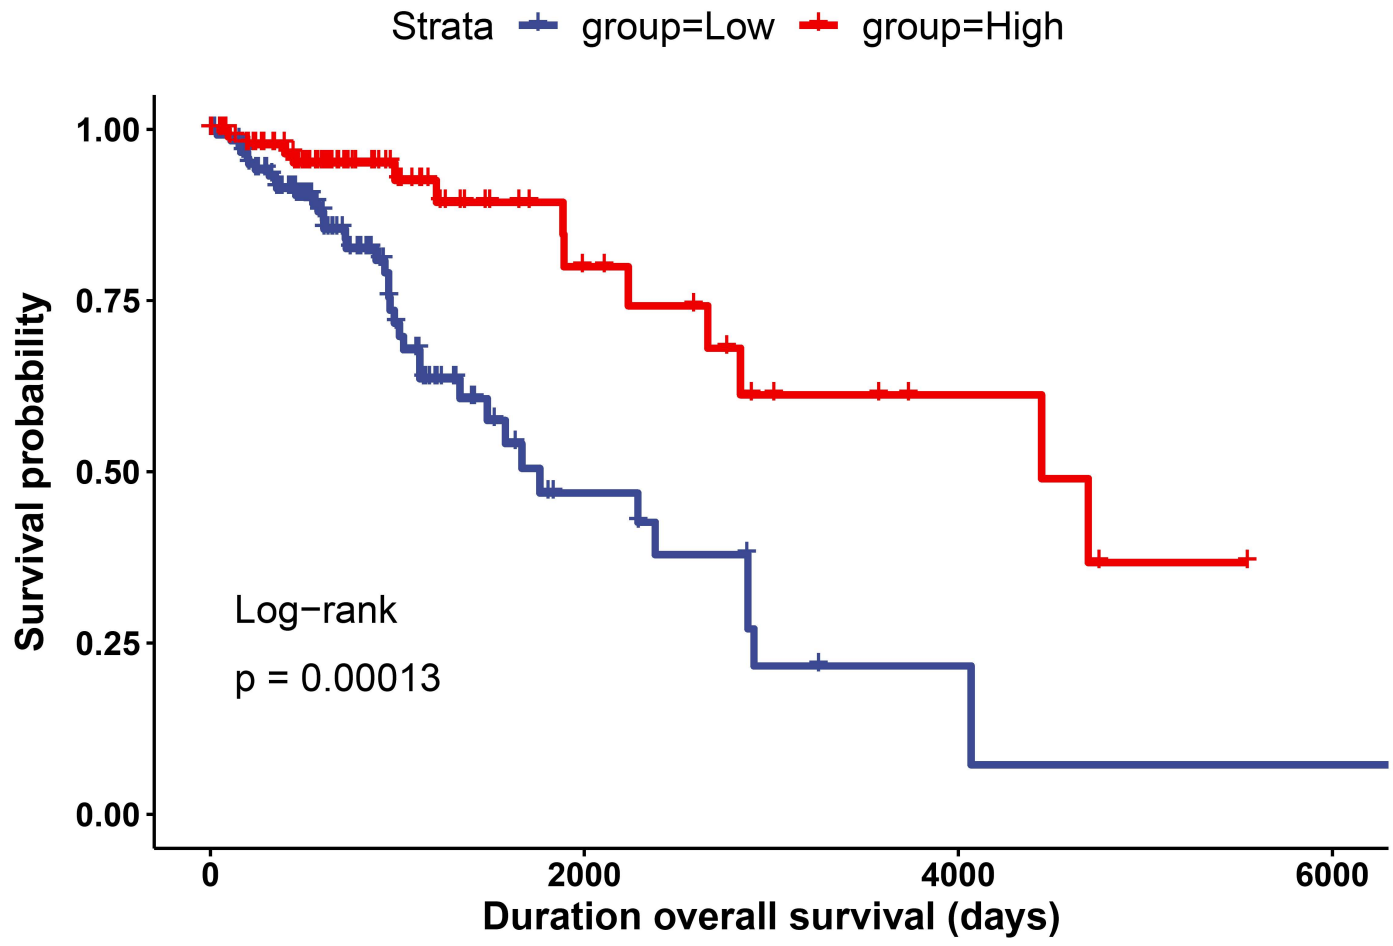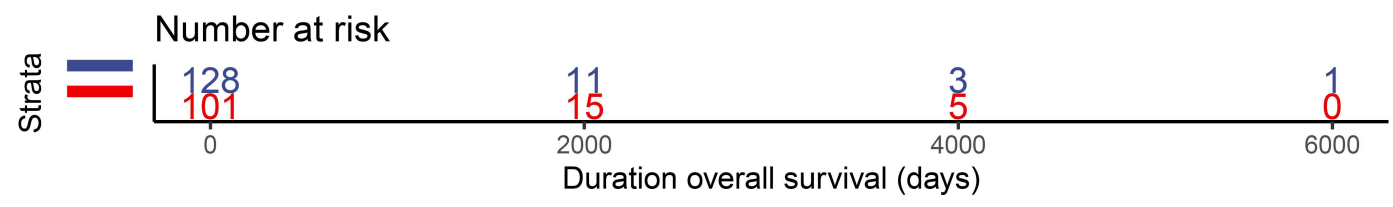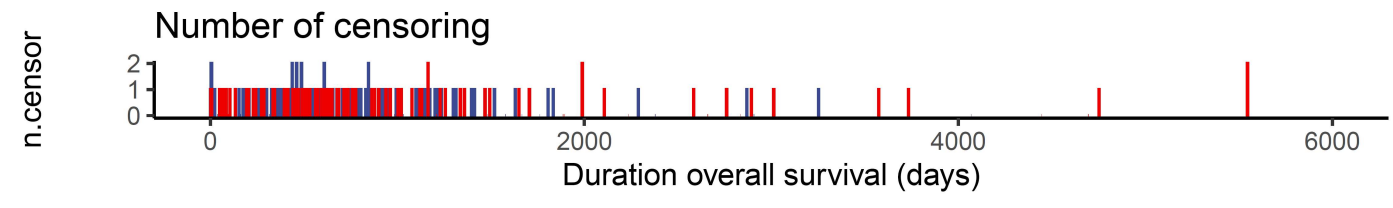

Strata + group=Low + group=High

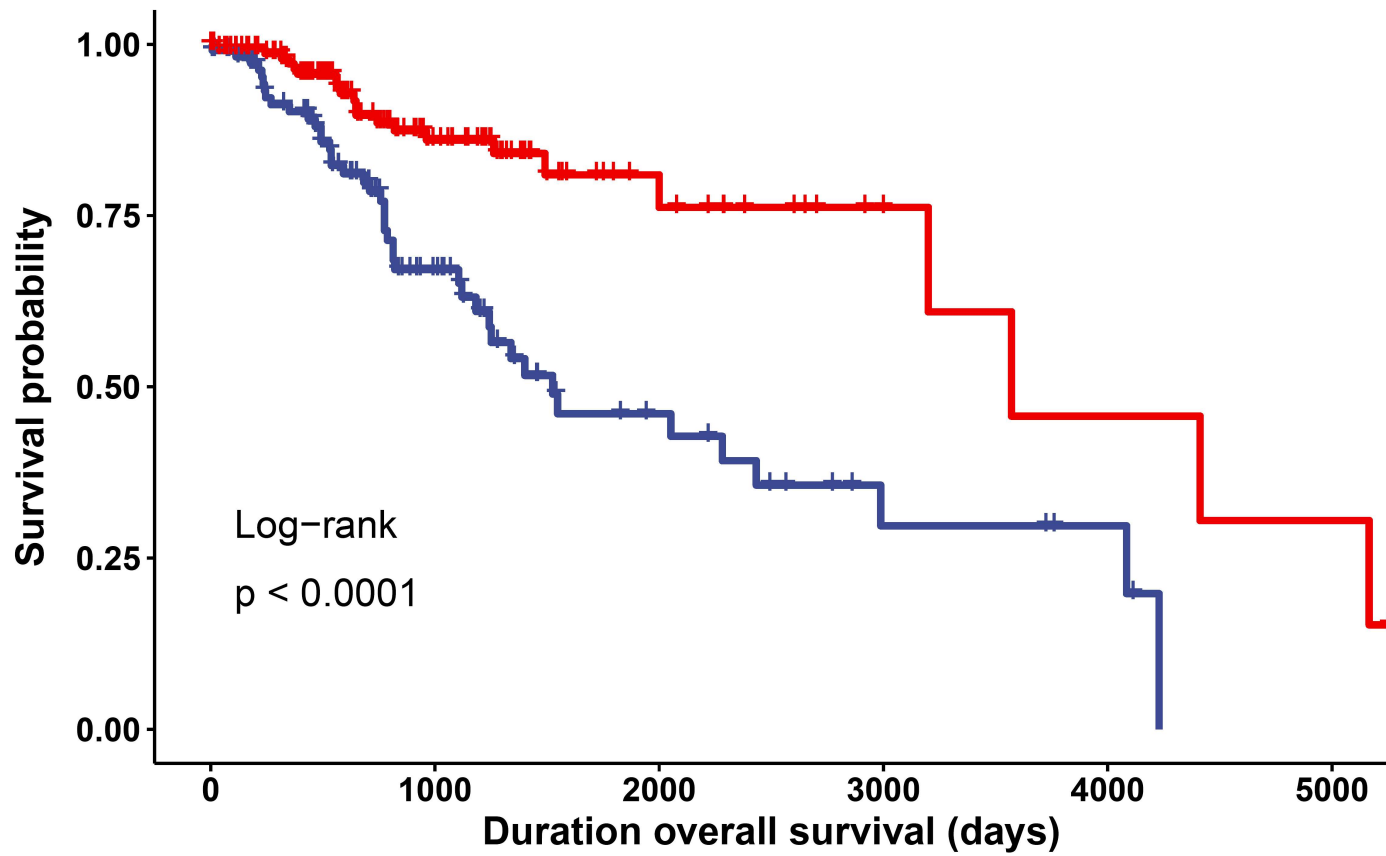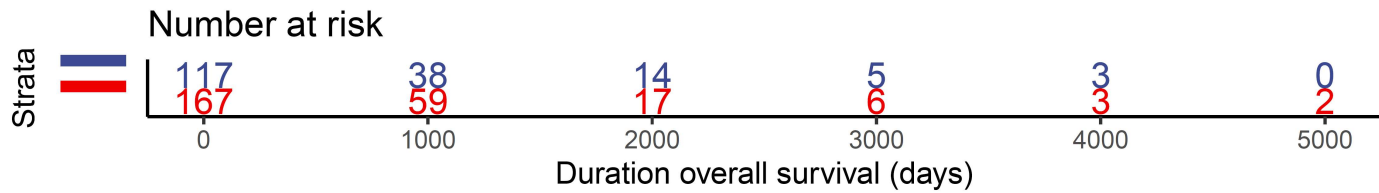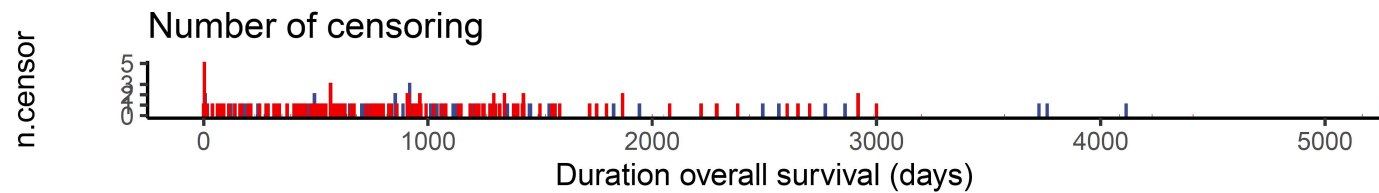

Strata group=Low group=High

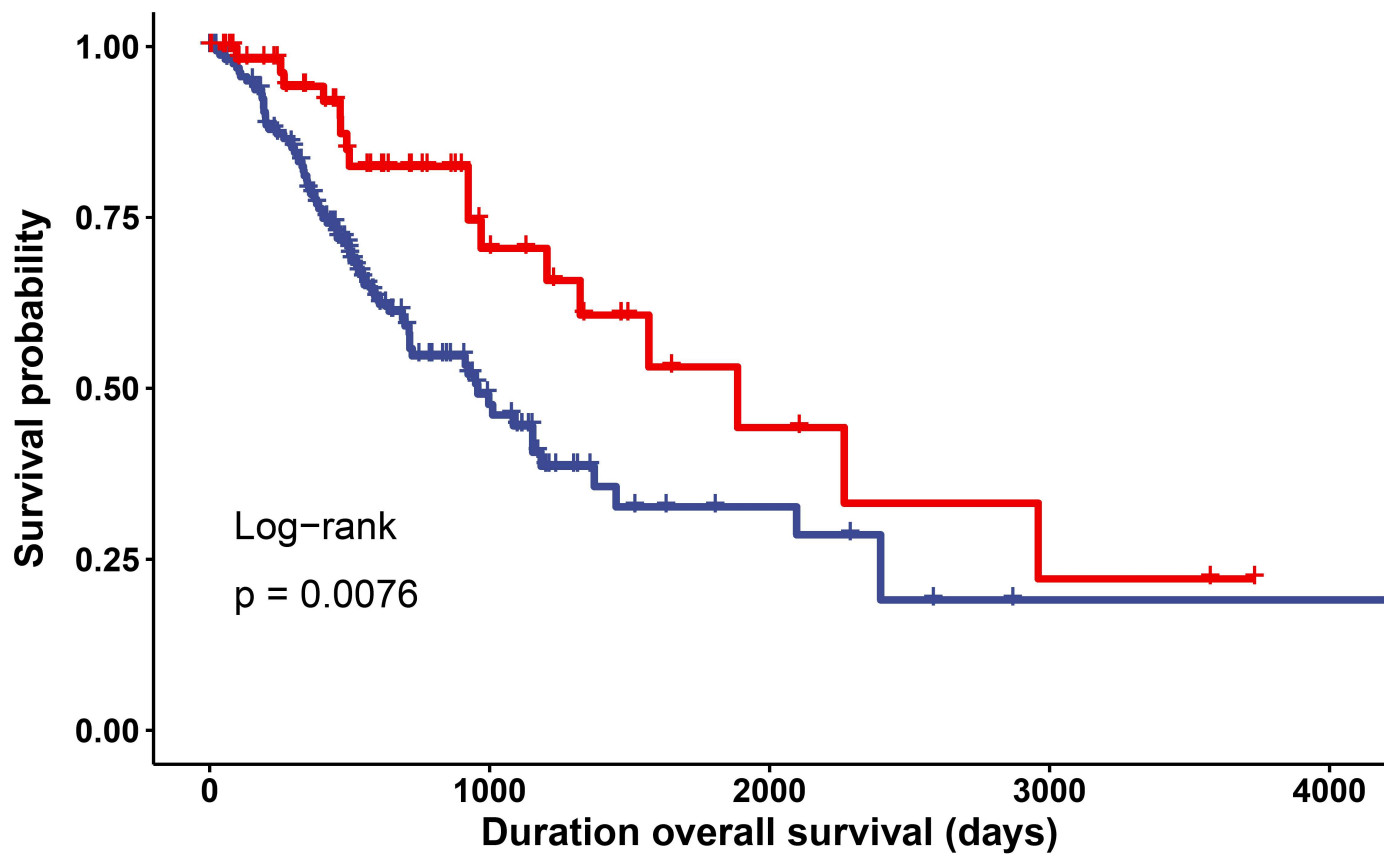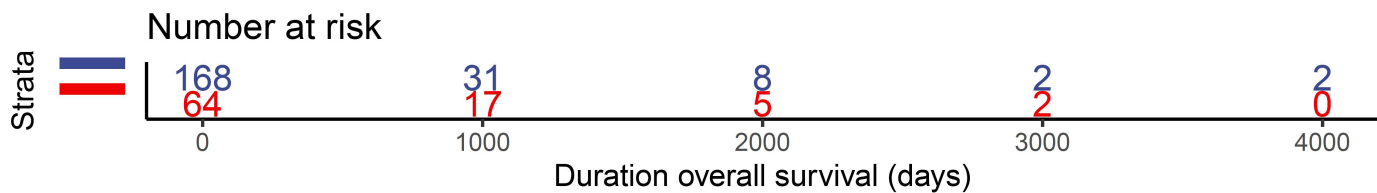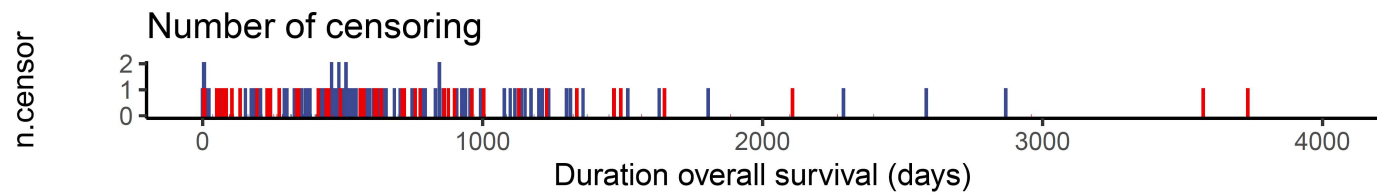

Strata group=Low group=High

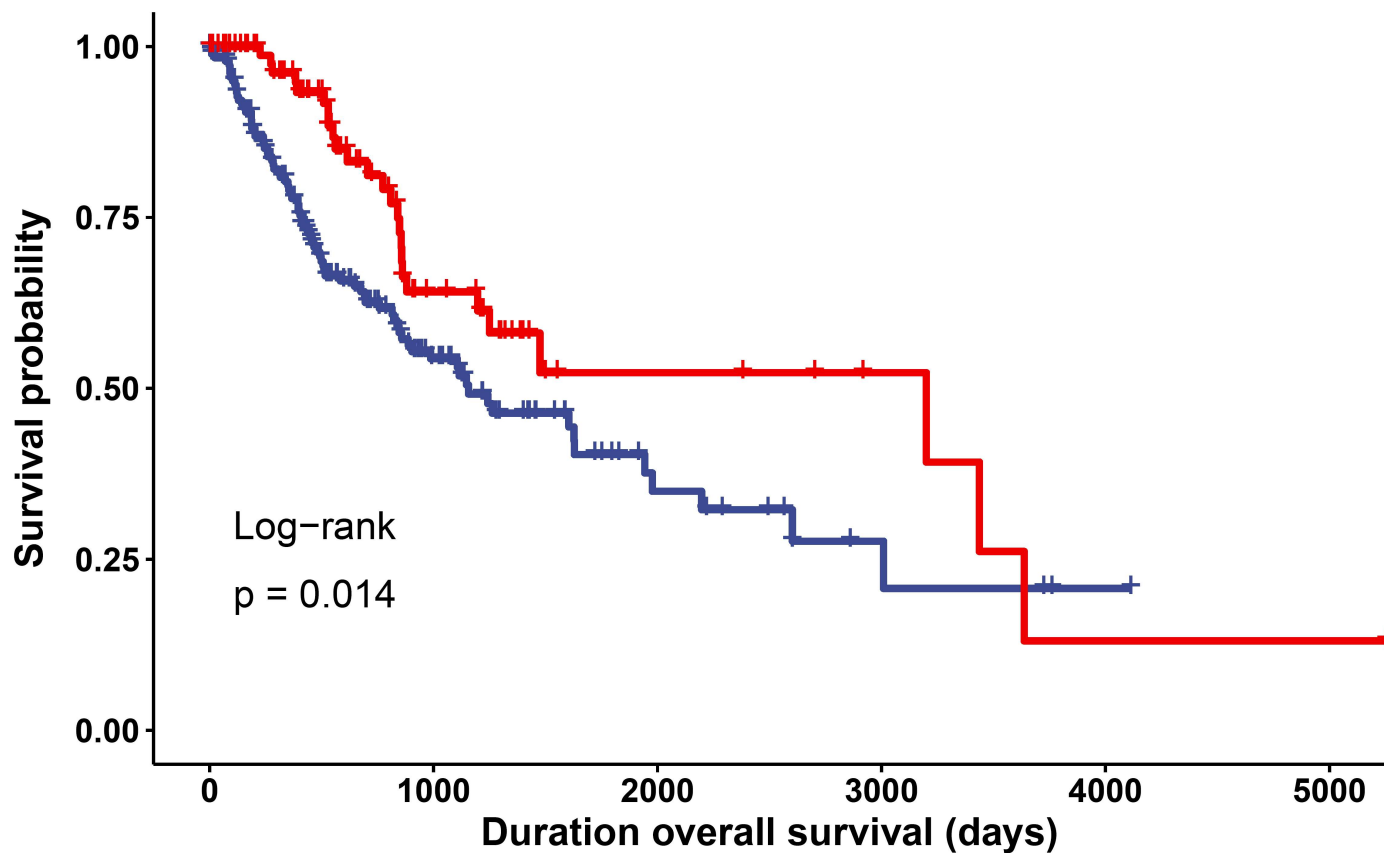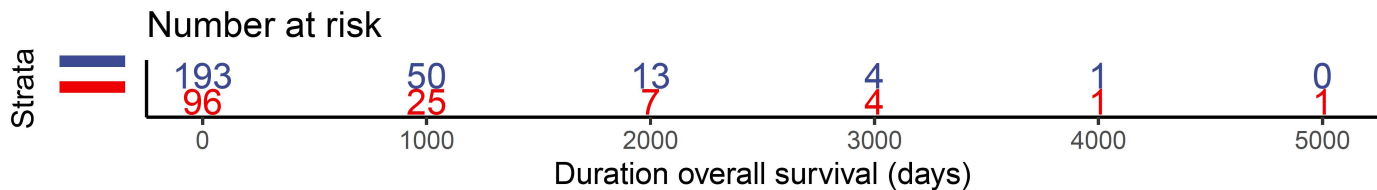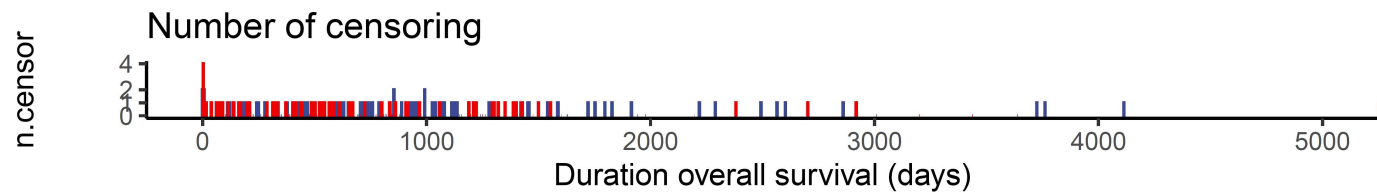



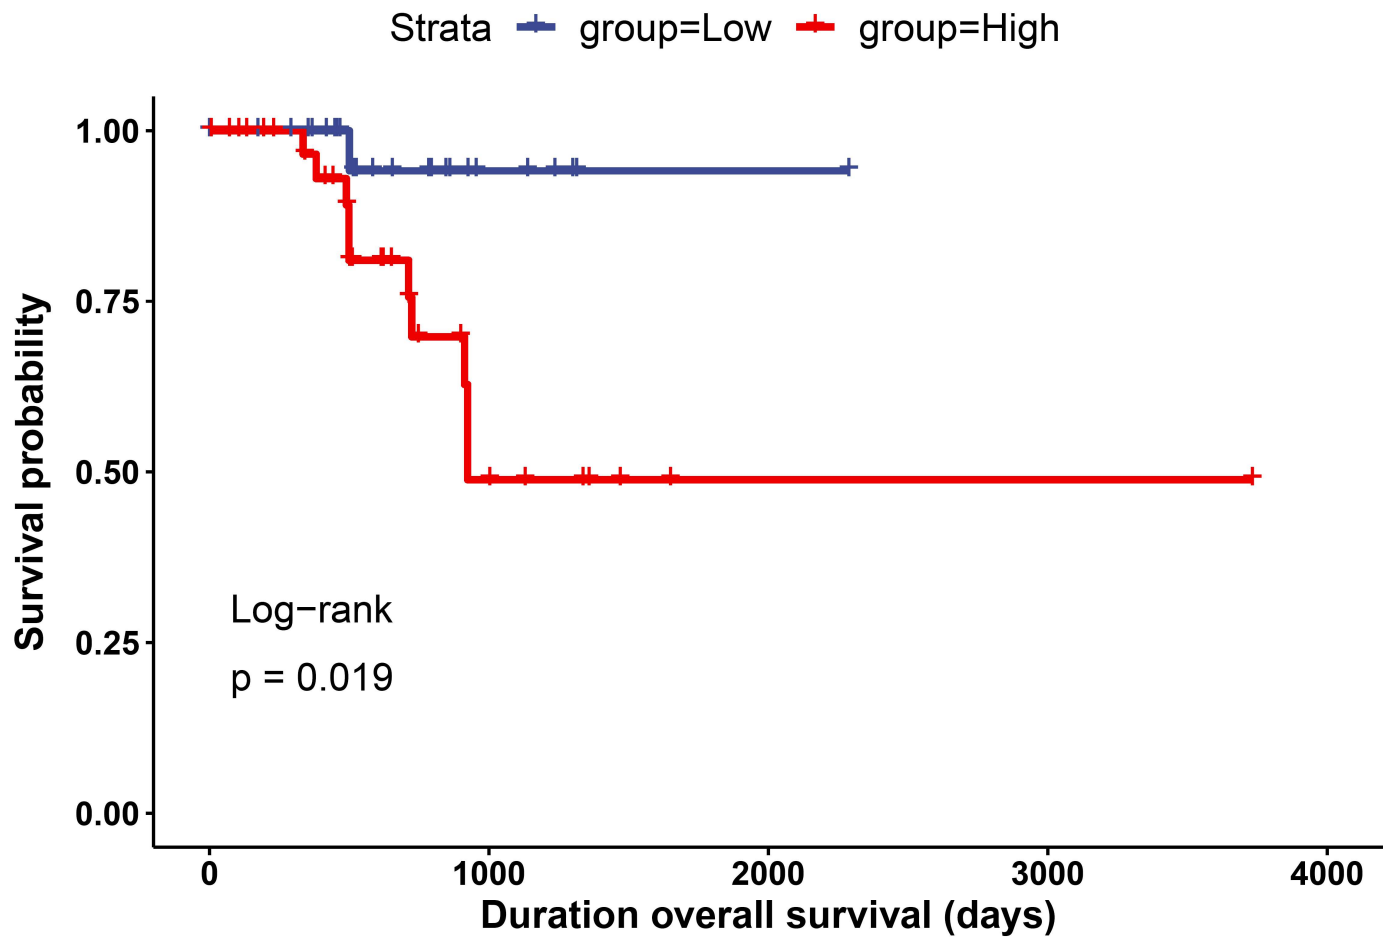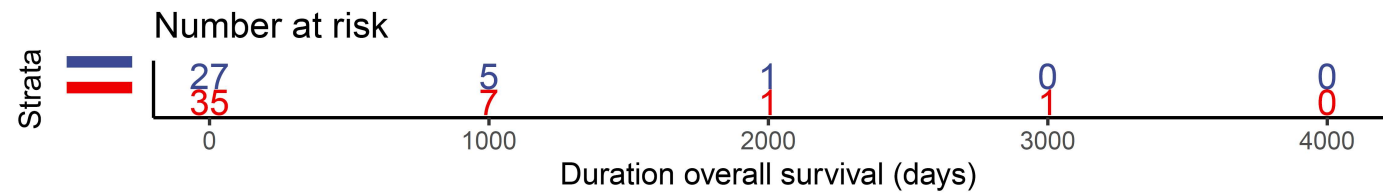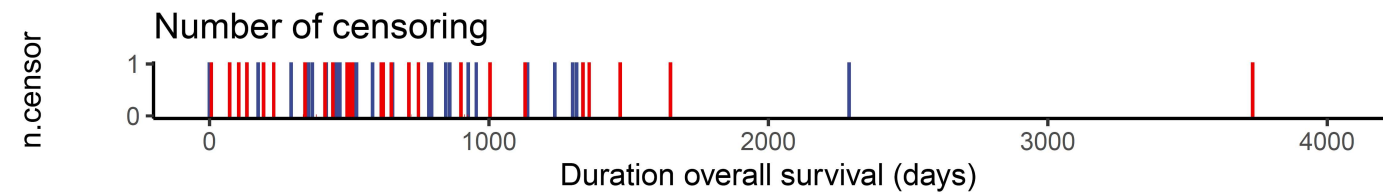

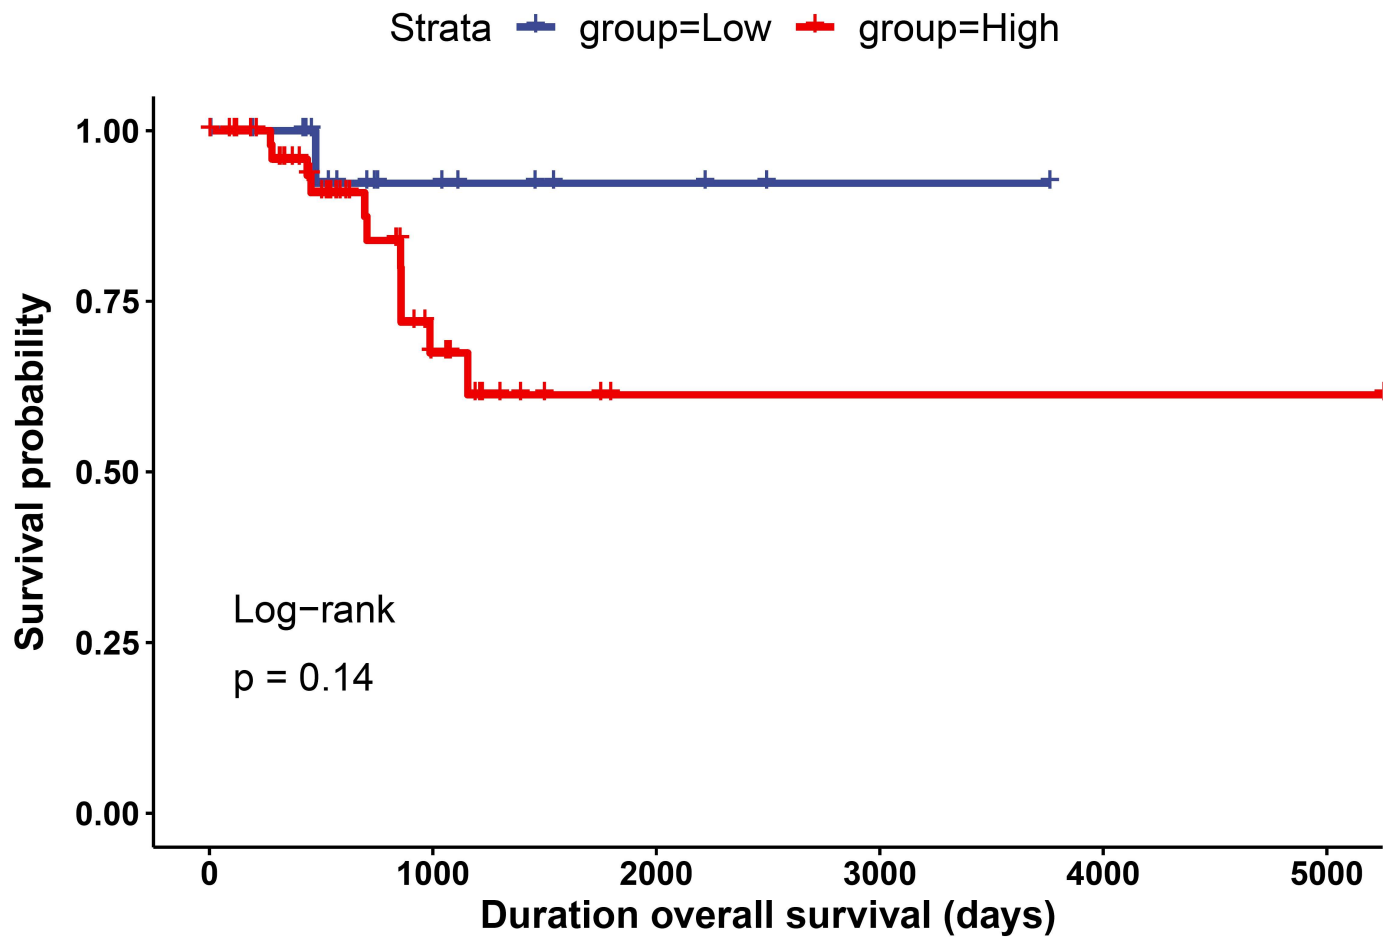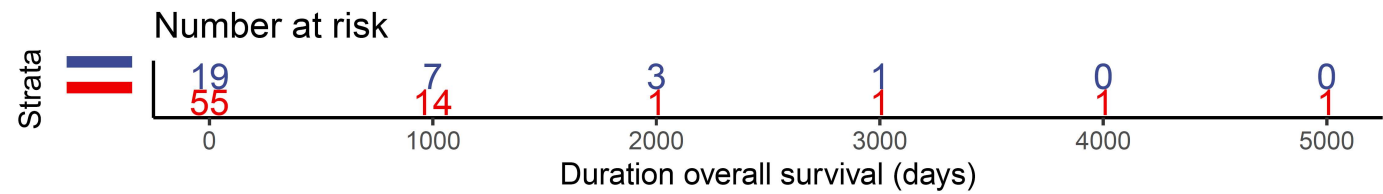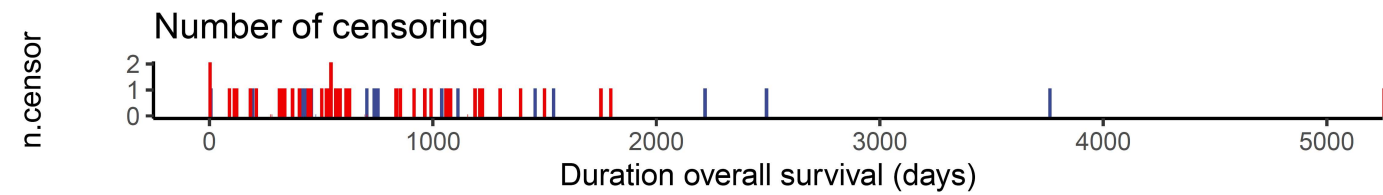





Strata + group=Low + group=High

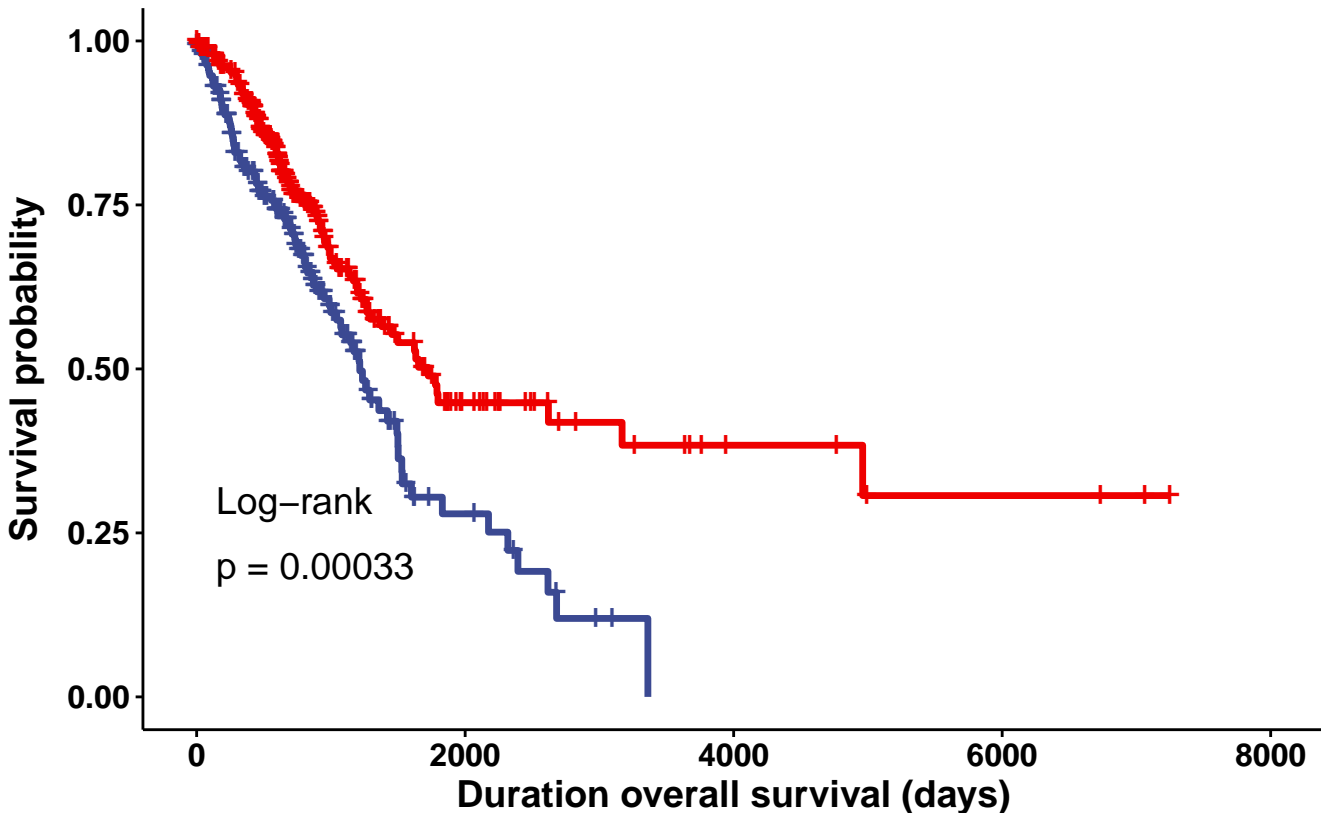

Number at risk

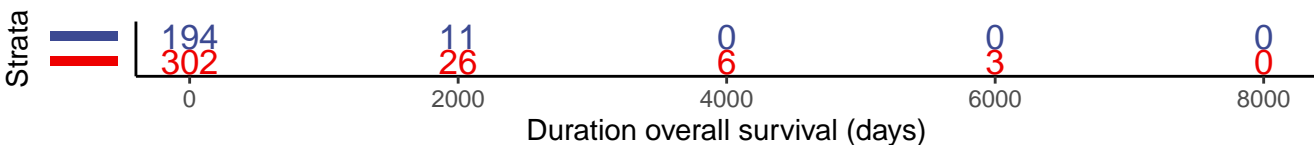

Number of censoring

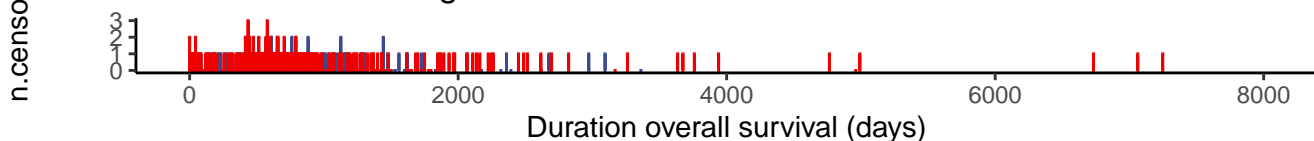

Strata **+** group=Low **+** group=High

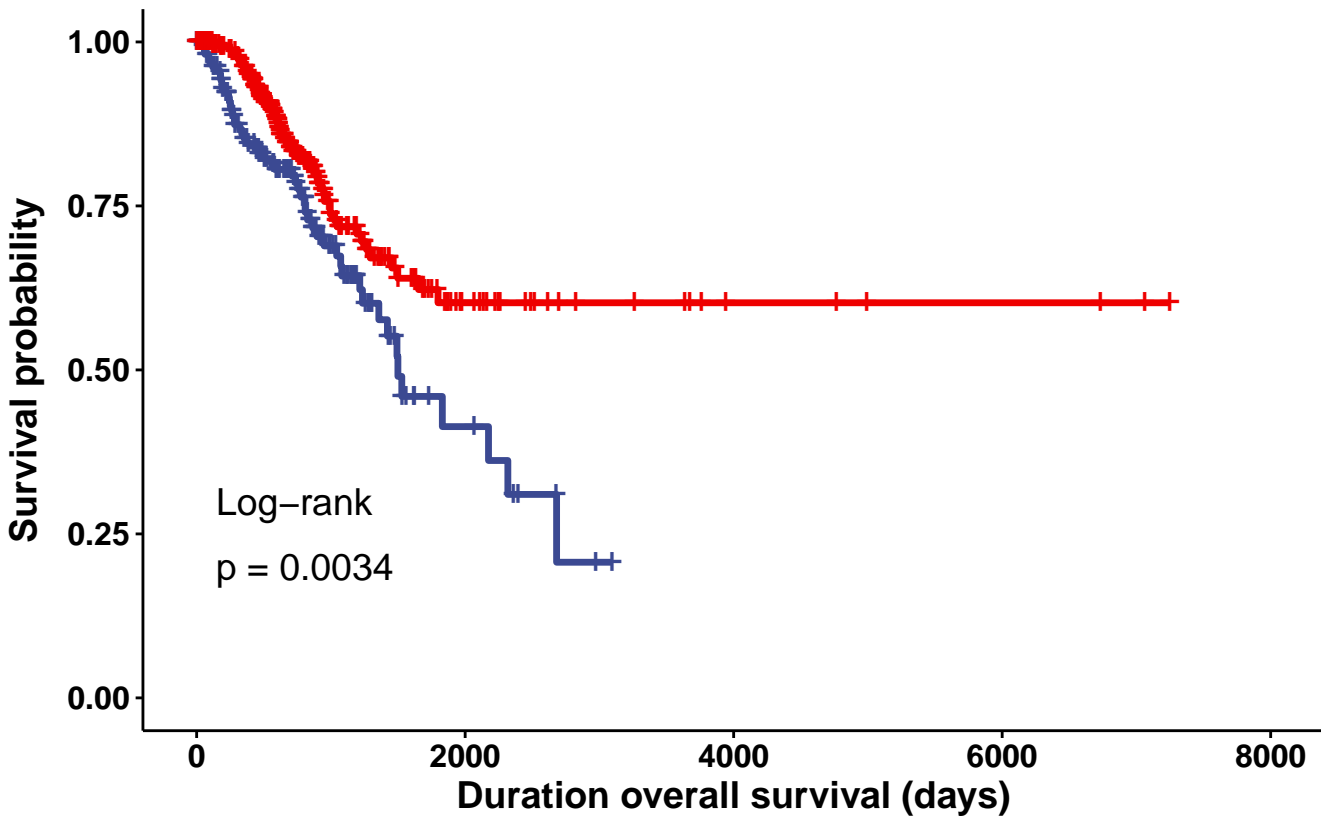

Number at risk

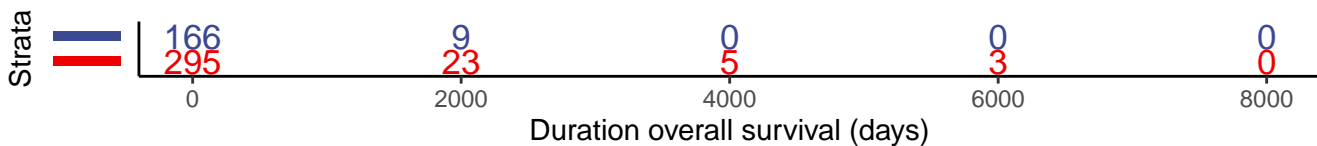

Number of censoring

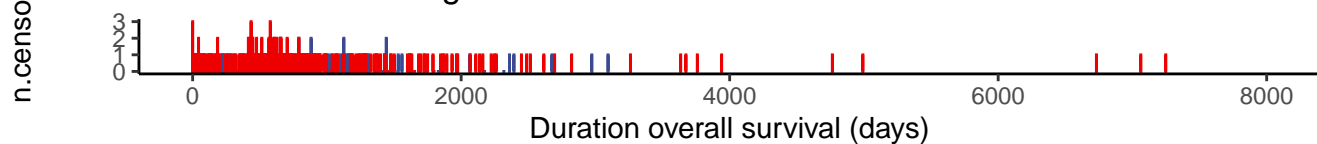

Strata **+** group=Low **+** group=High

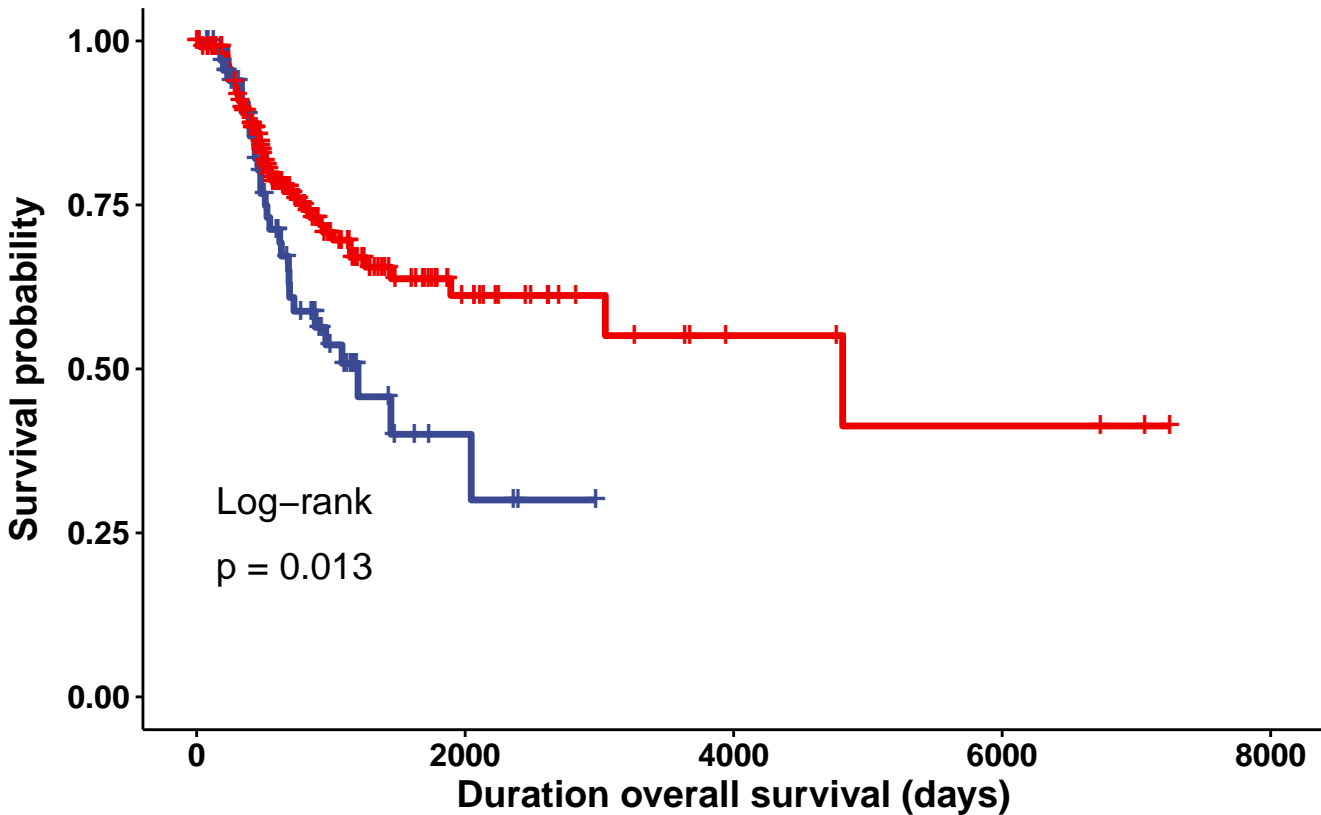

Number at risk

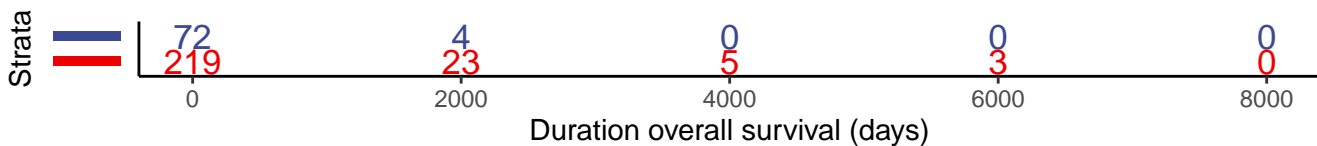

Number of censoring

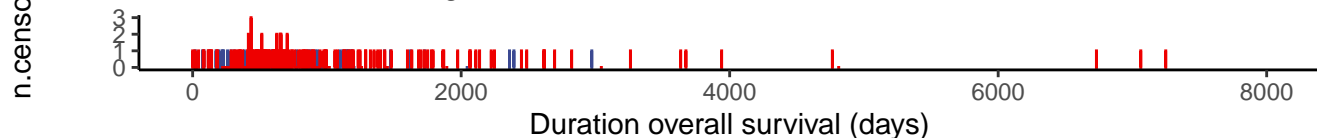



Strata **+** group=Low **+** group=High

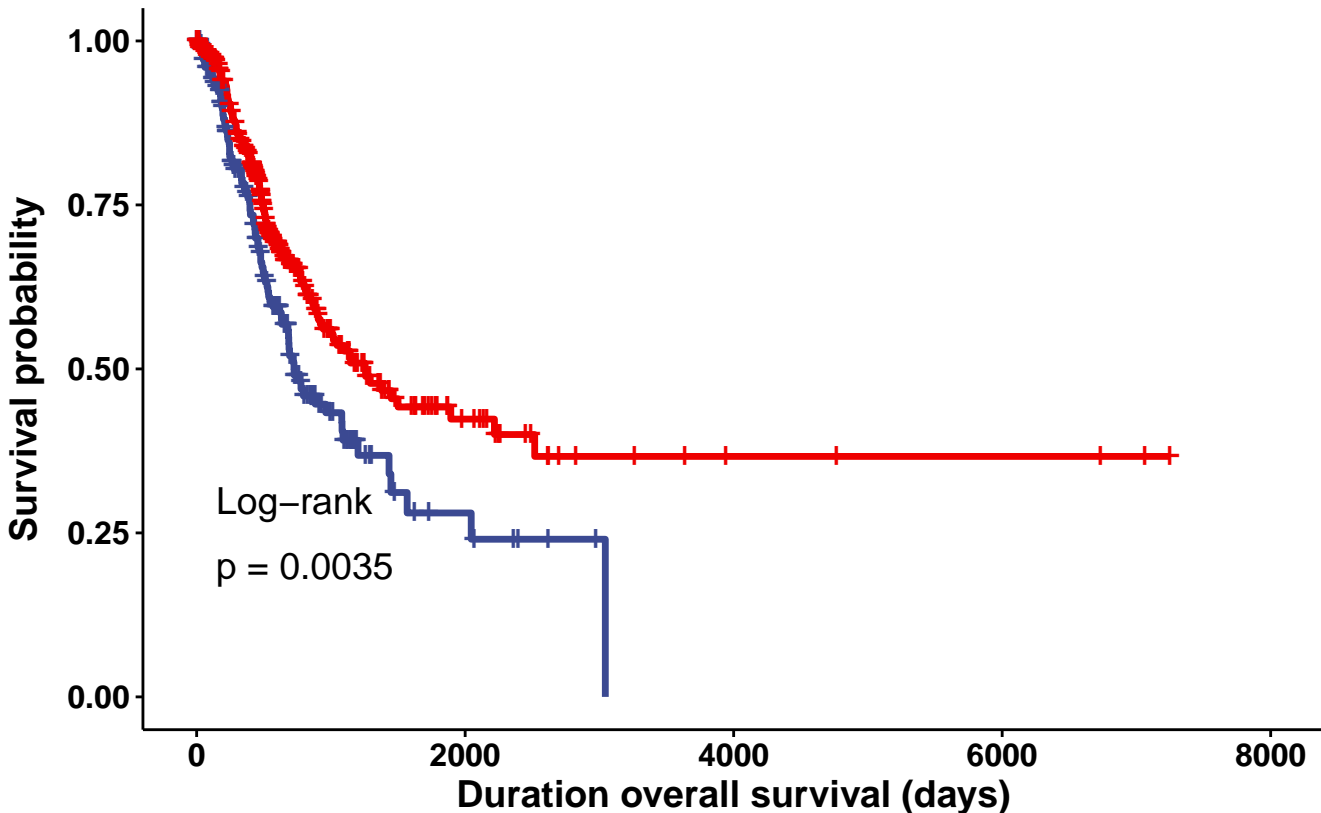

Number at risk

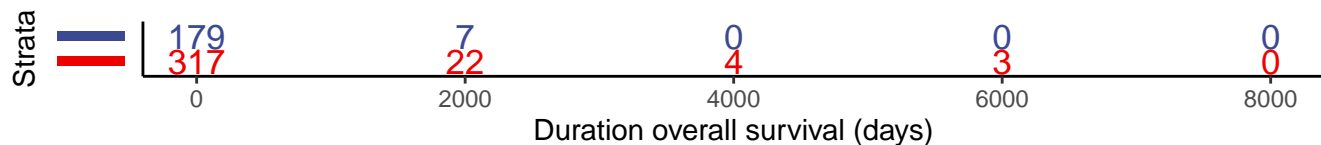

Number of censoring

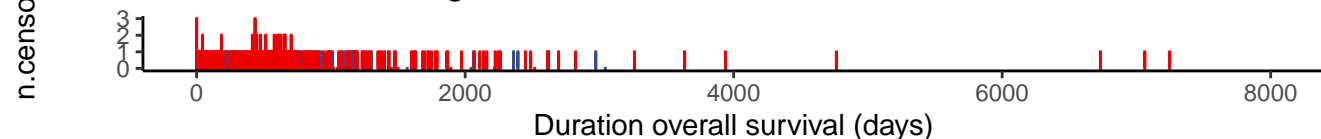

Strata **+** group=Low **+** group=High

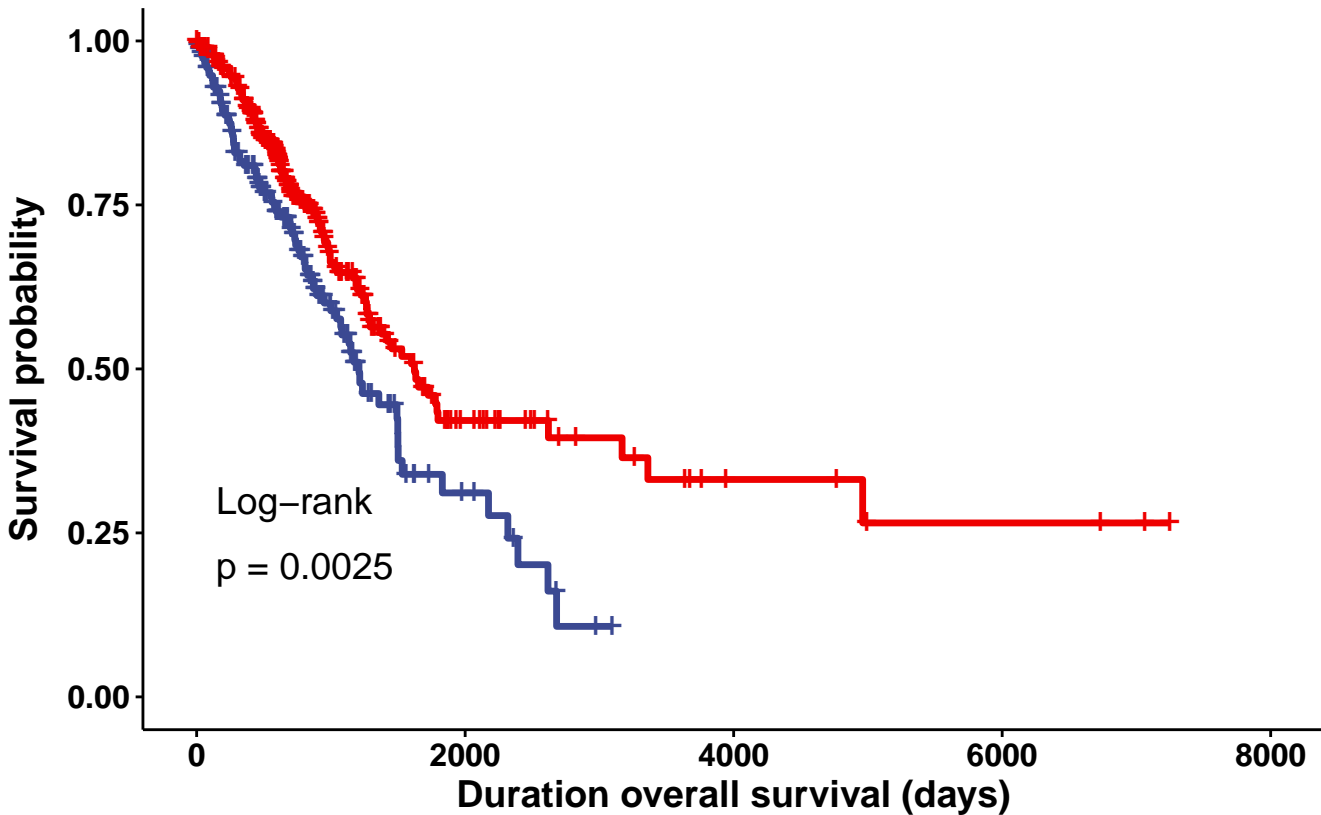

Number at risk

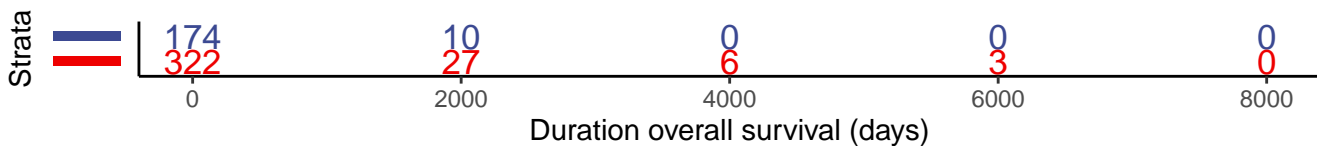

Number of censoring

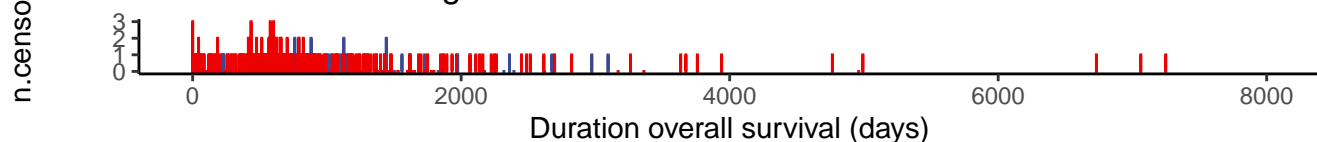

Strata + group=Low + group=High

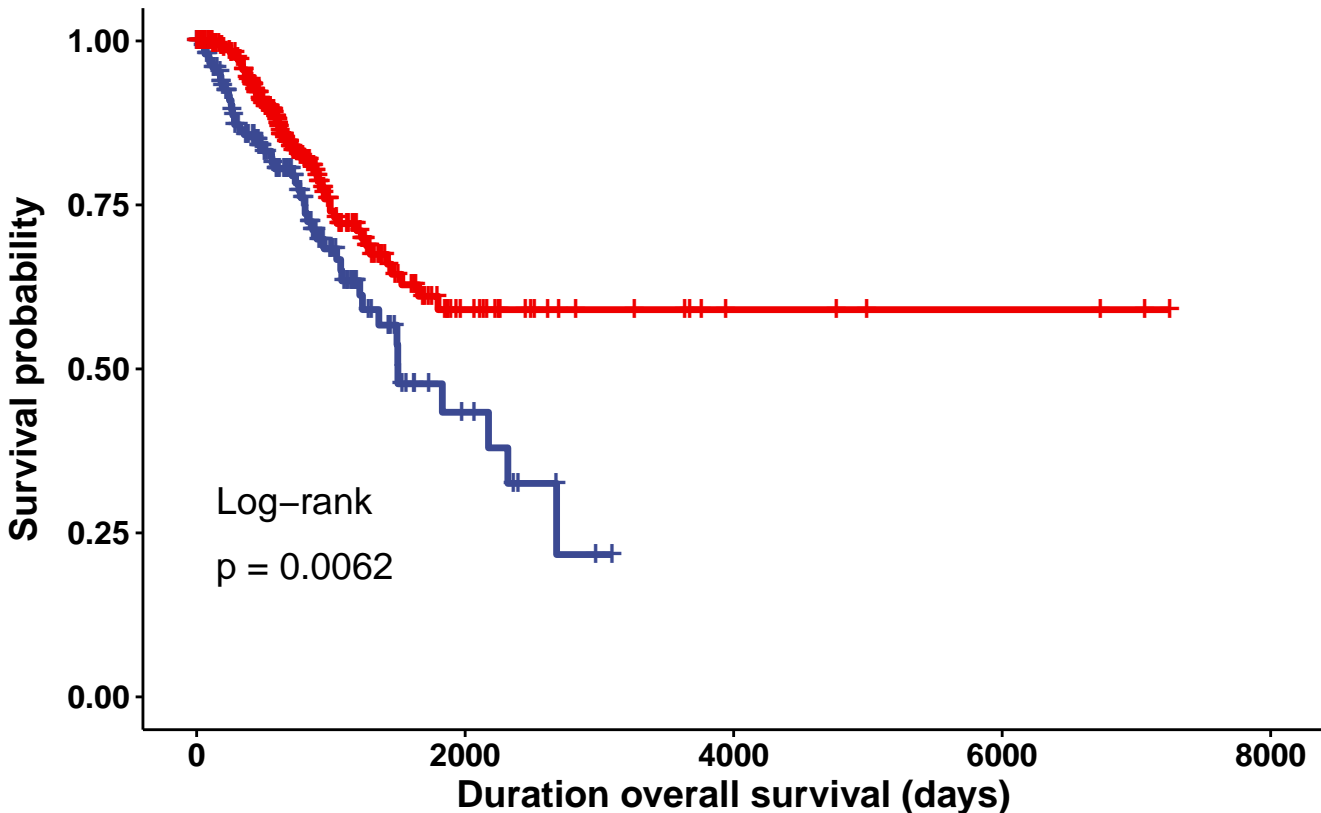

Number at risk

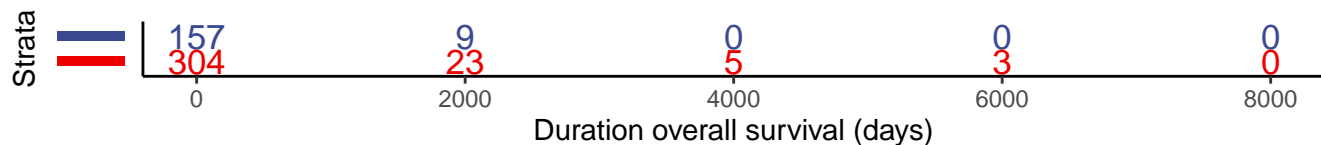

Number of censoring

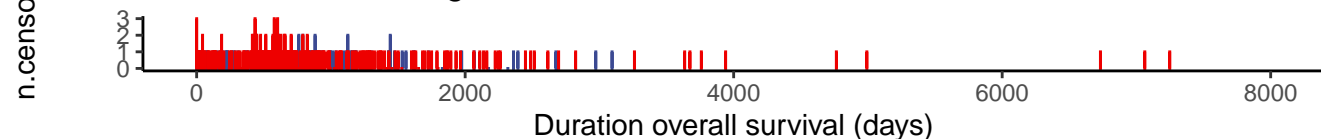

Strata **+** group=Low **+** group=High

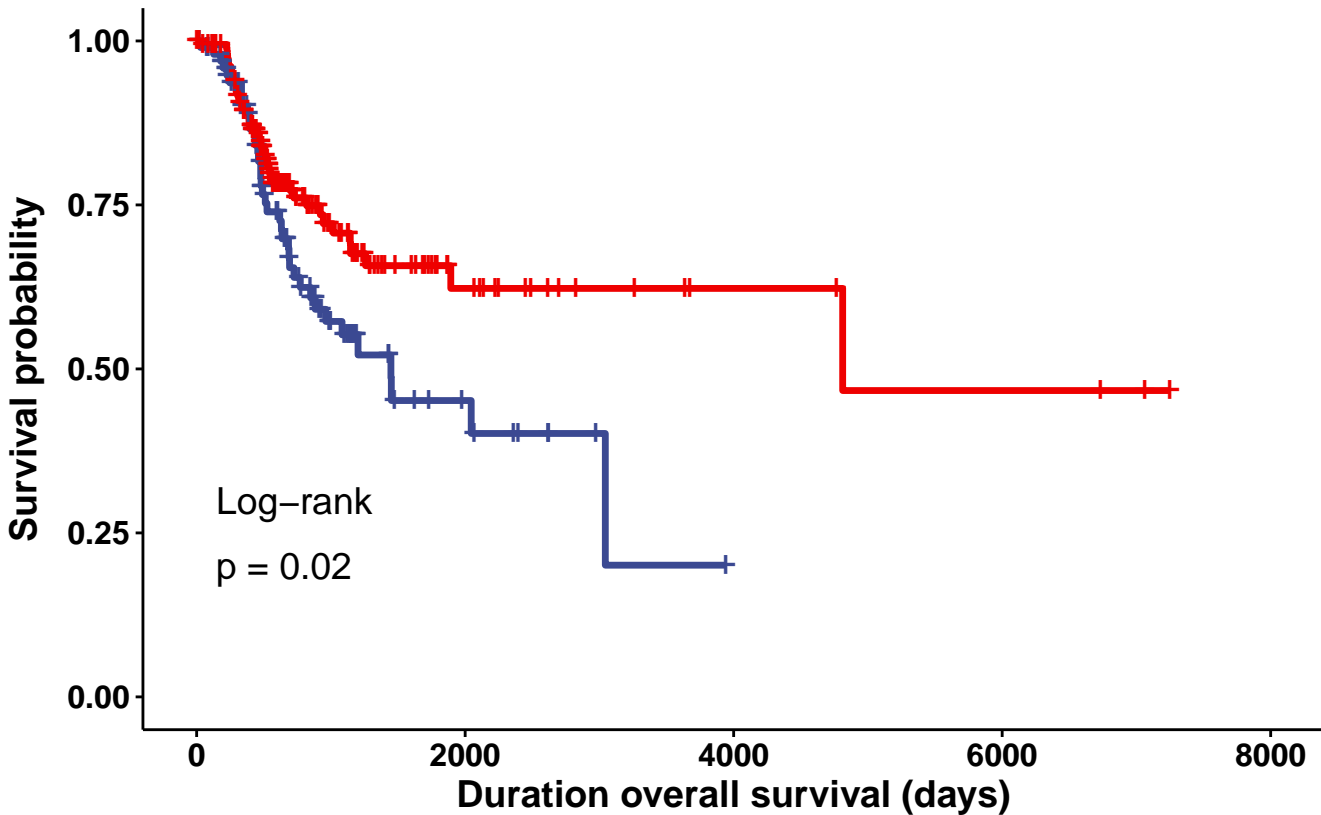

Number at risk

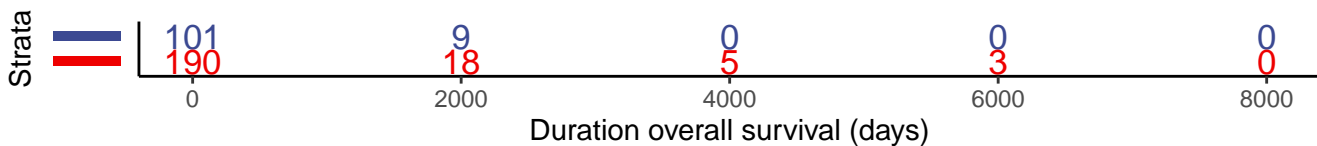

Number of censoring

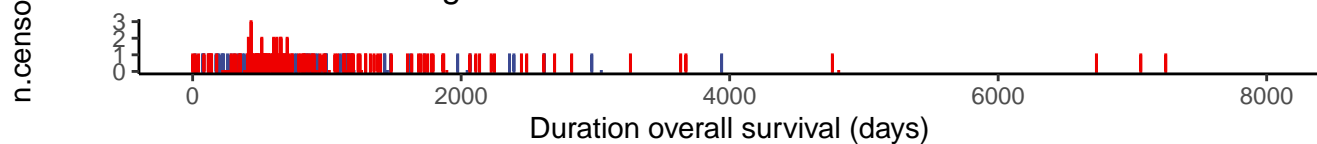

Strata **+** group=Low **+** group=High

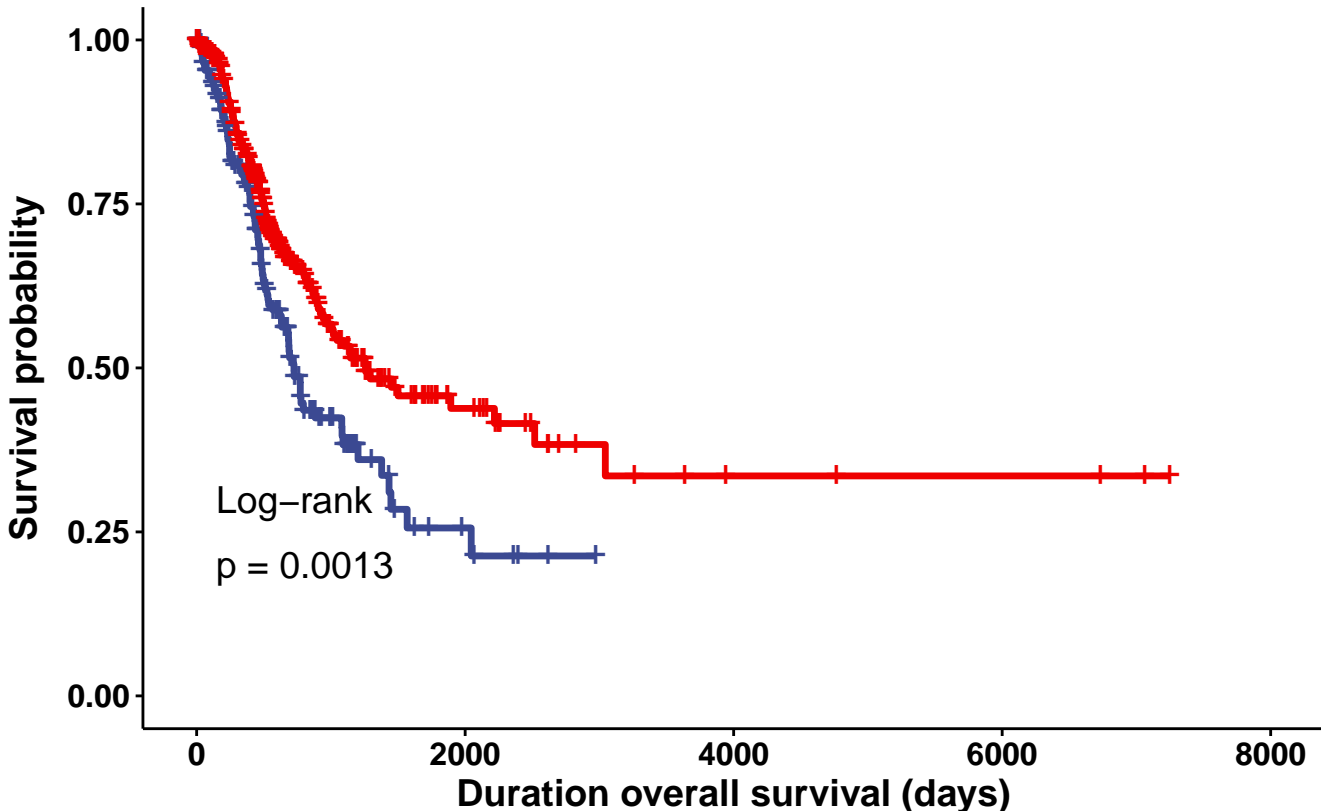

Number at risk

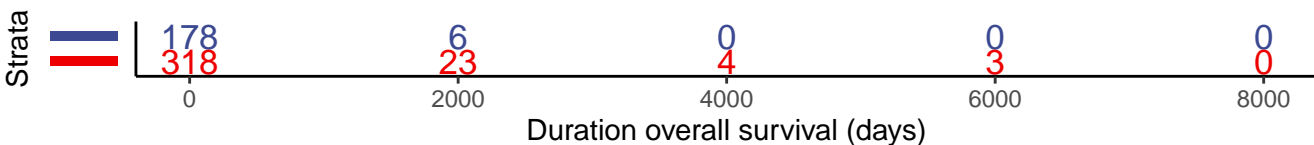

Number of censoring

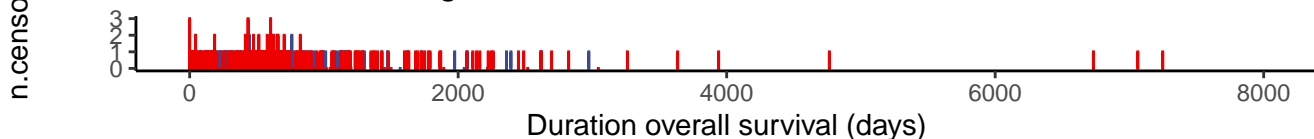

Strata + group=Low + group=High

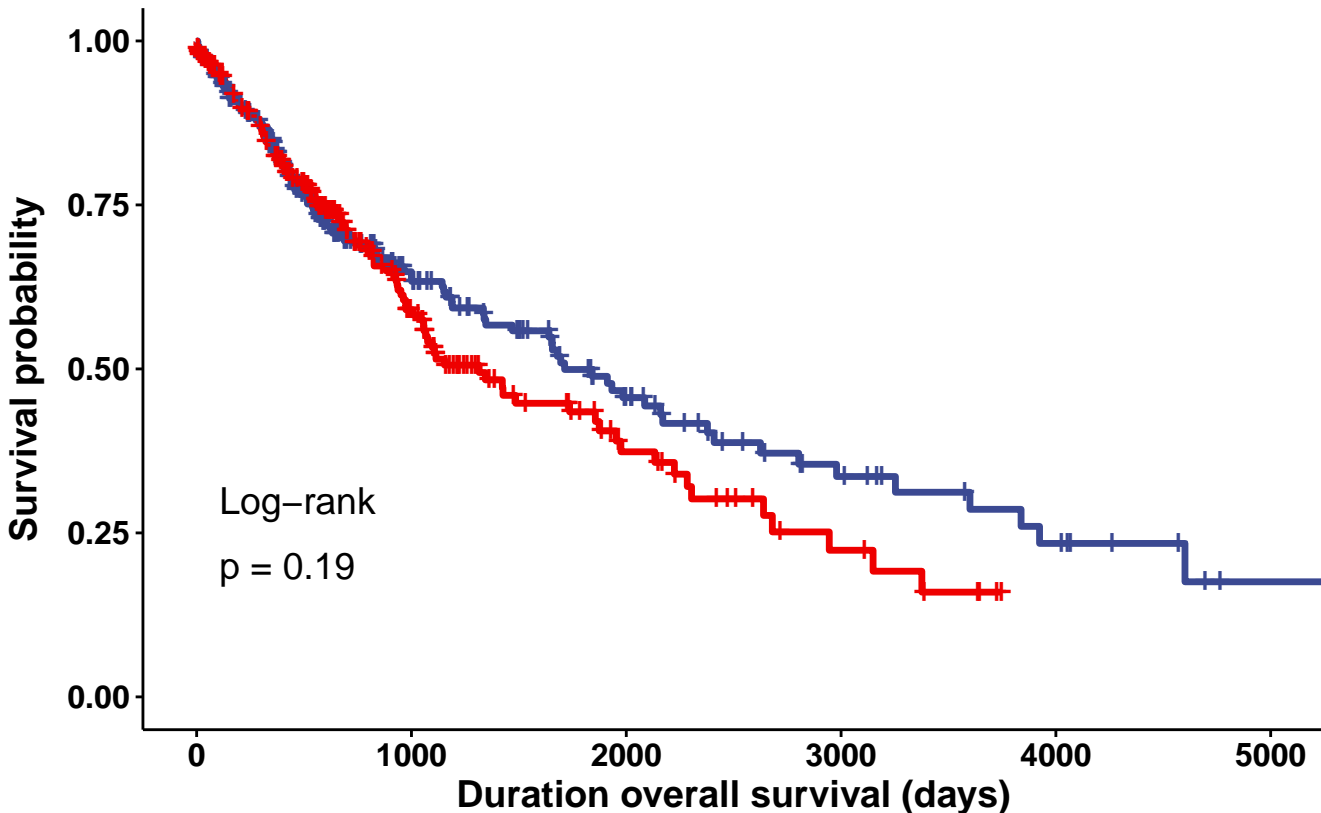

Number at risk

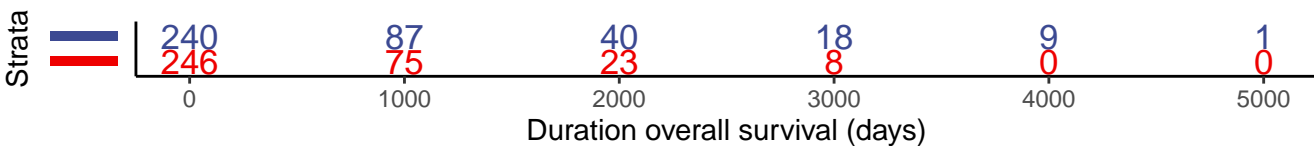

Number of censoring

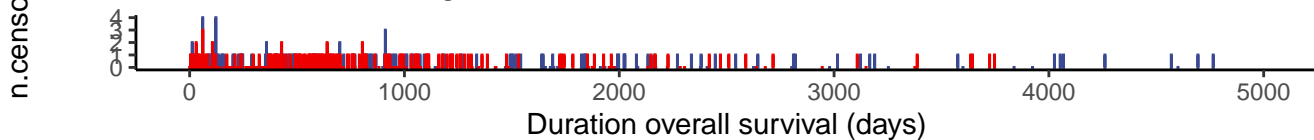

Strata + group=Low + group=High

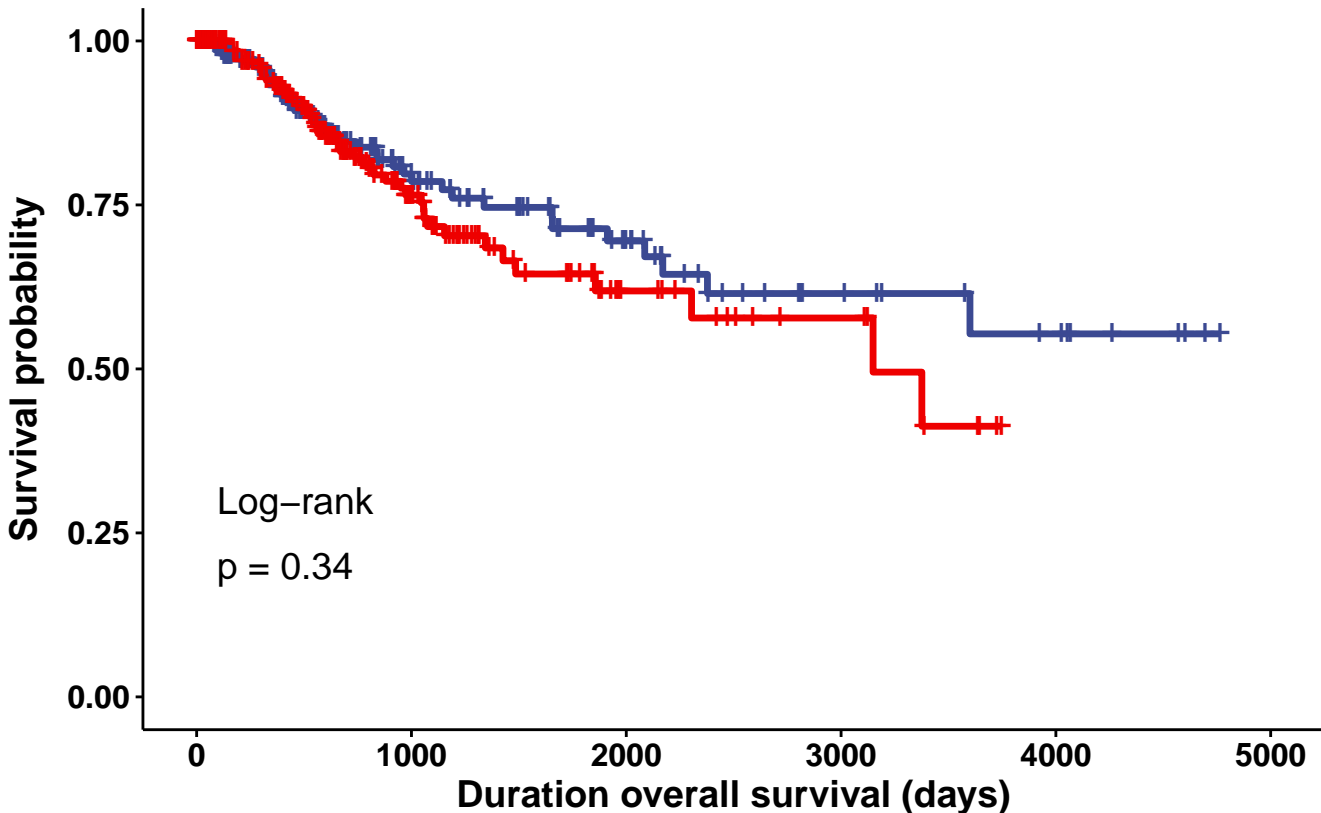

Number at risk

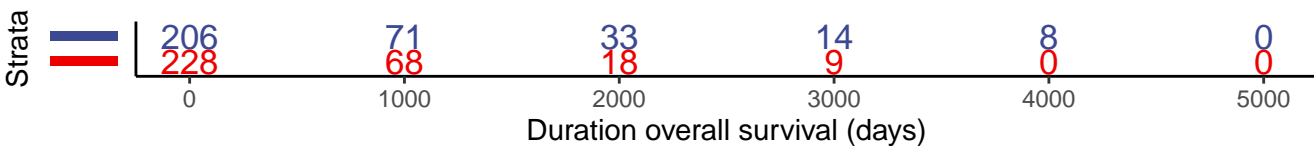

Number of censoring

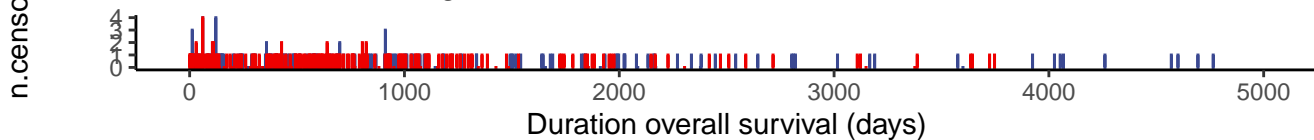



Strata + group=Low + group=High

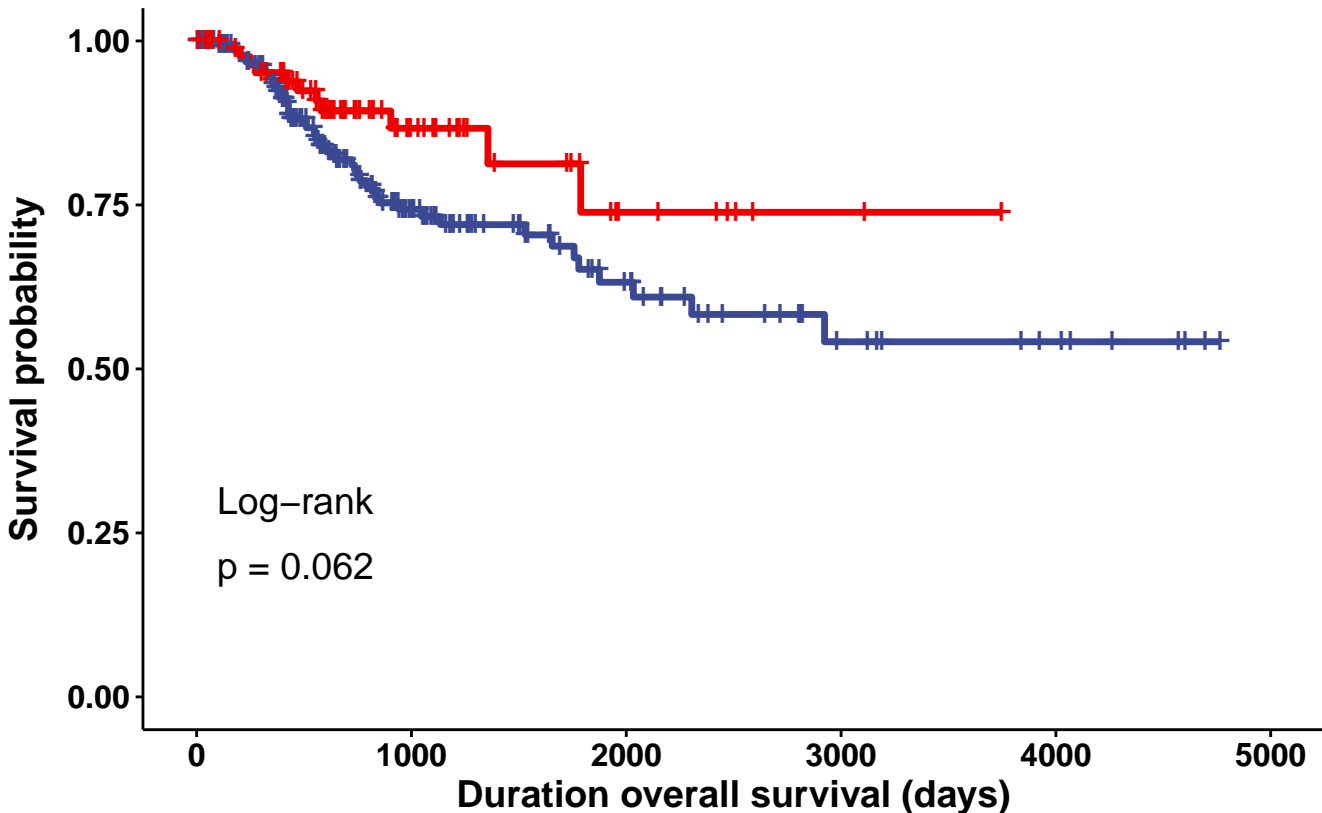

Number at risk

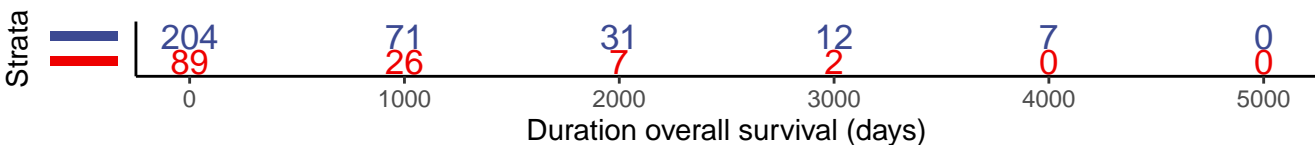

Number of censoring

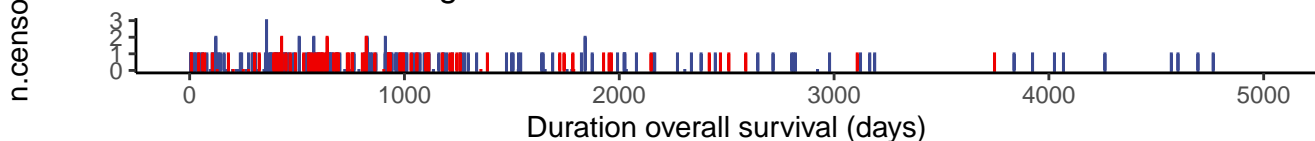

Strata + group=Low + group=High

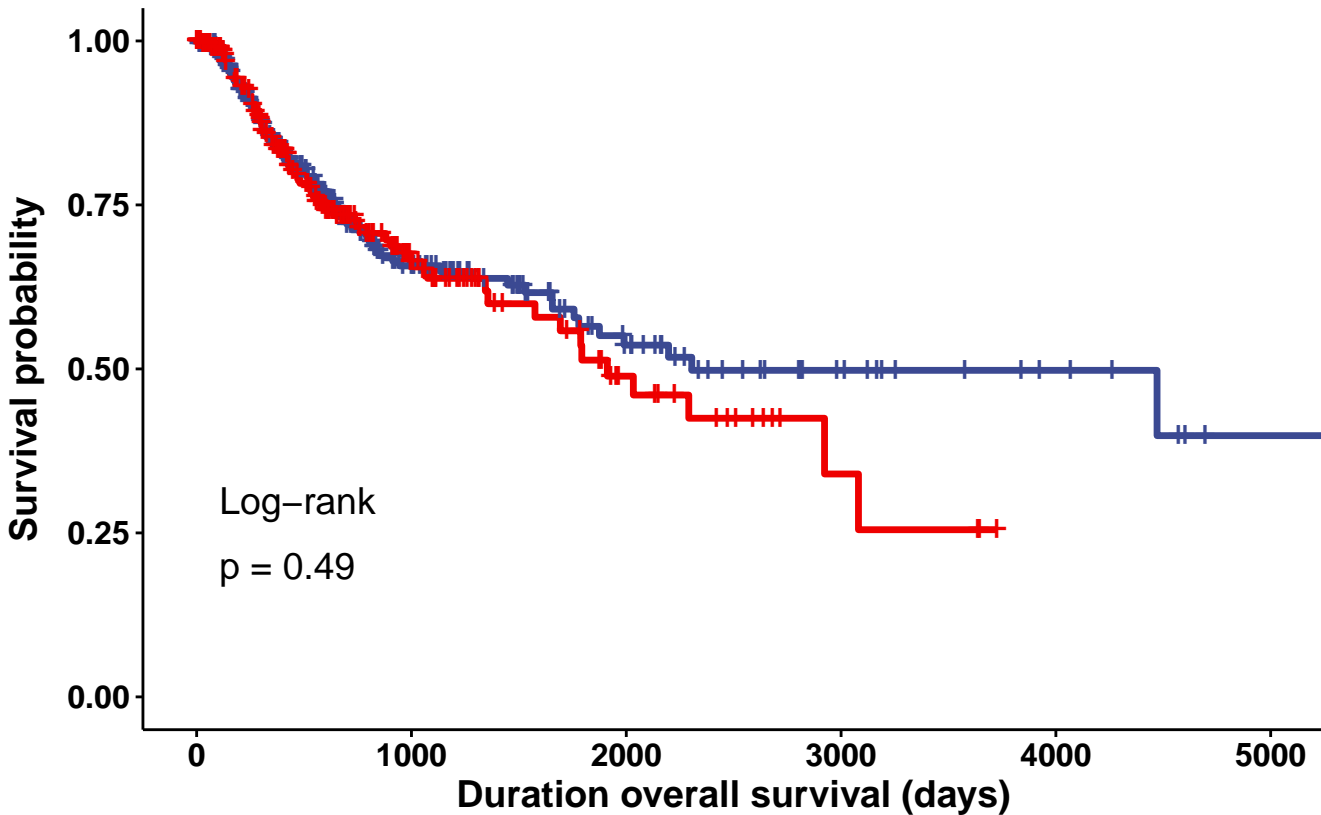

Number at risk

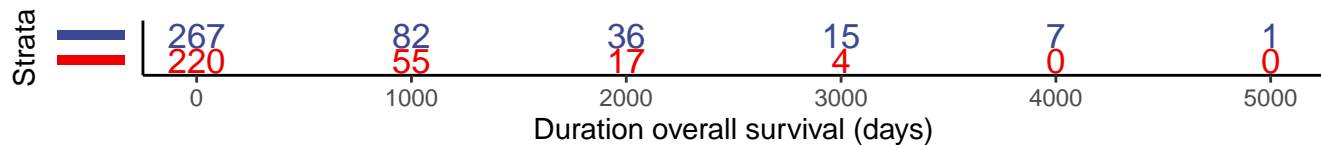

Number of censoring

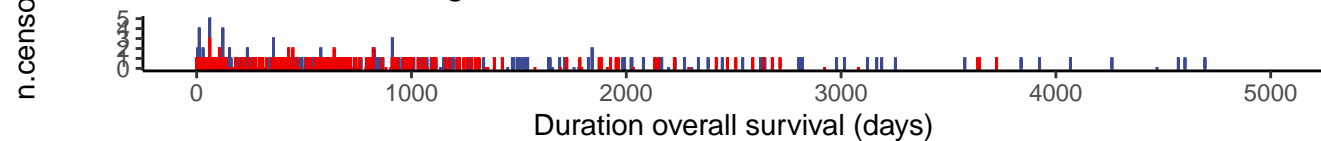

Strata + group=Low + group=High

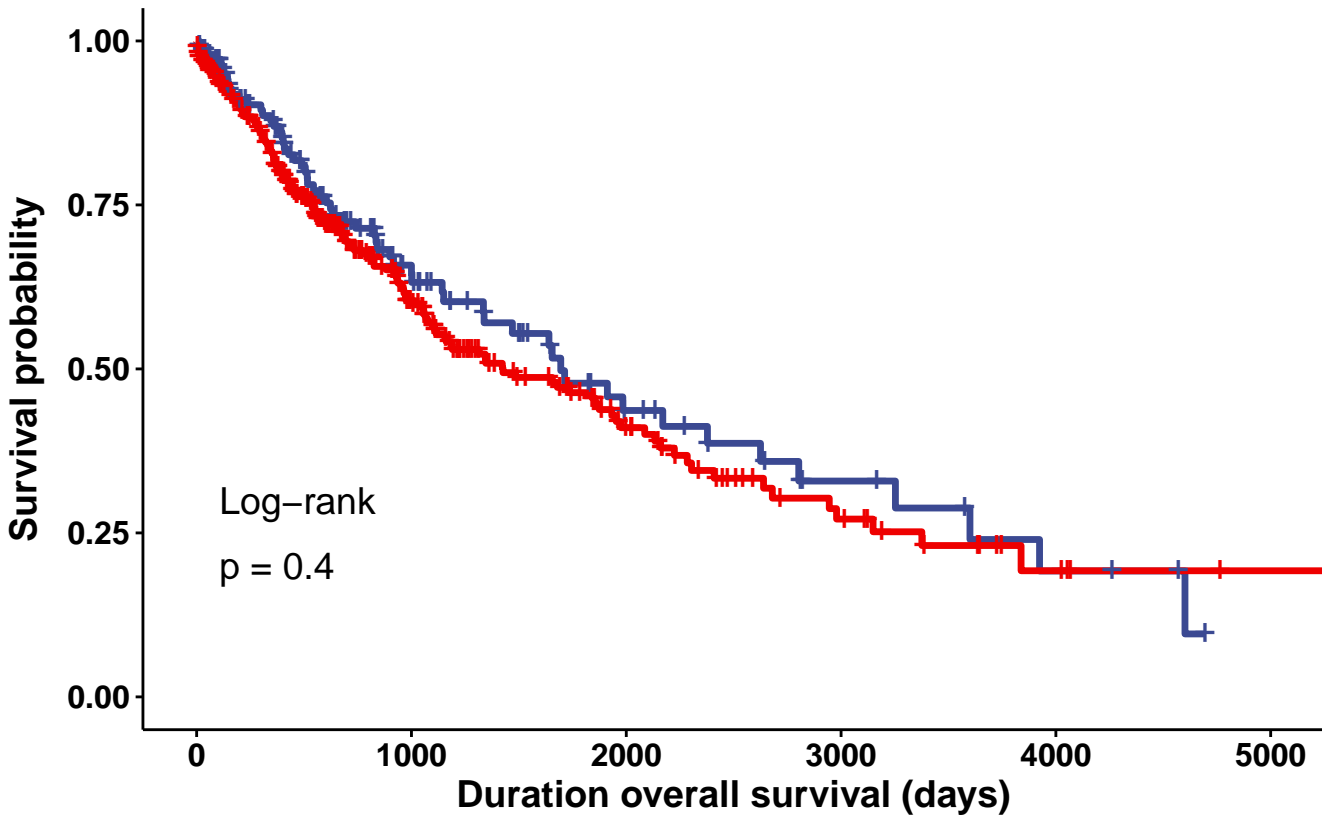

Number at risk

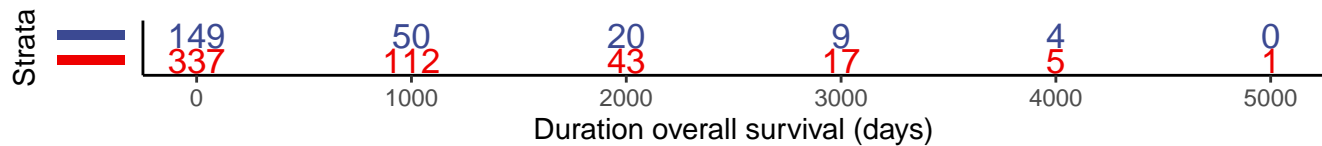

Number of censoring

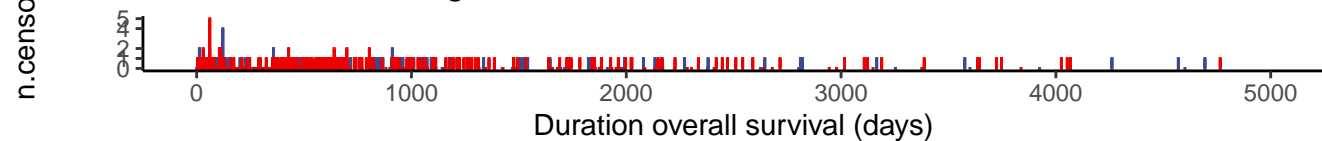

Strata + group=Low + group=High

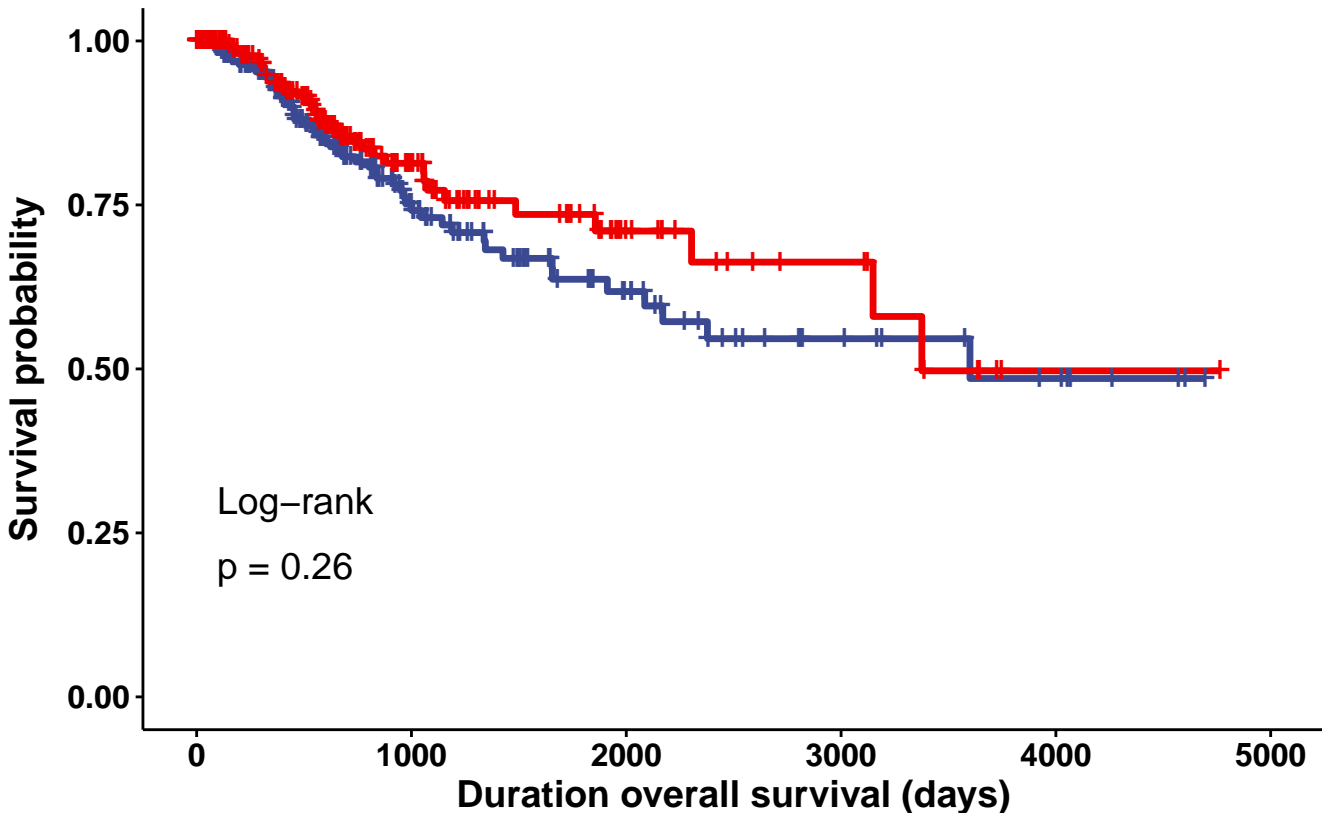

Number at risk

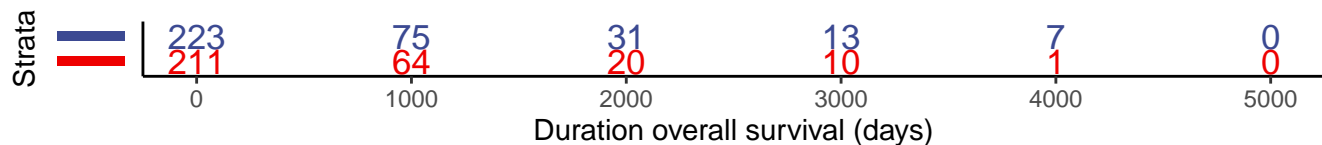

Number of censoring

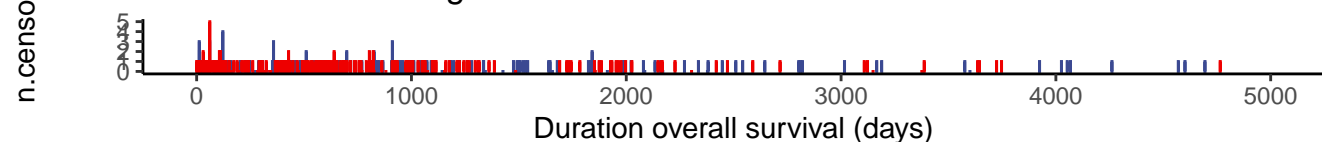

Strata + group=Low + group=High

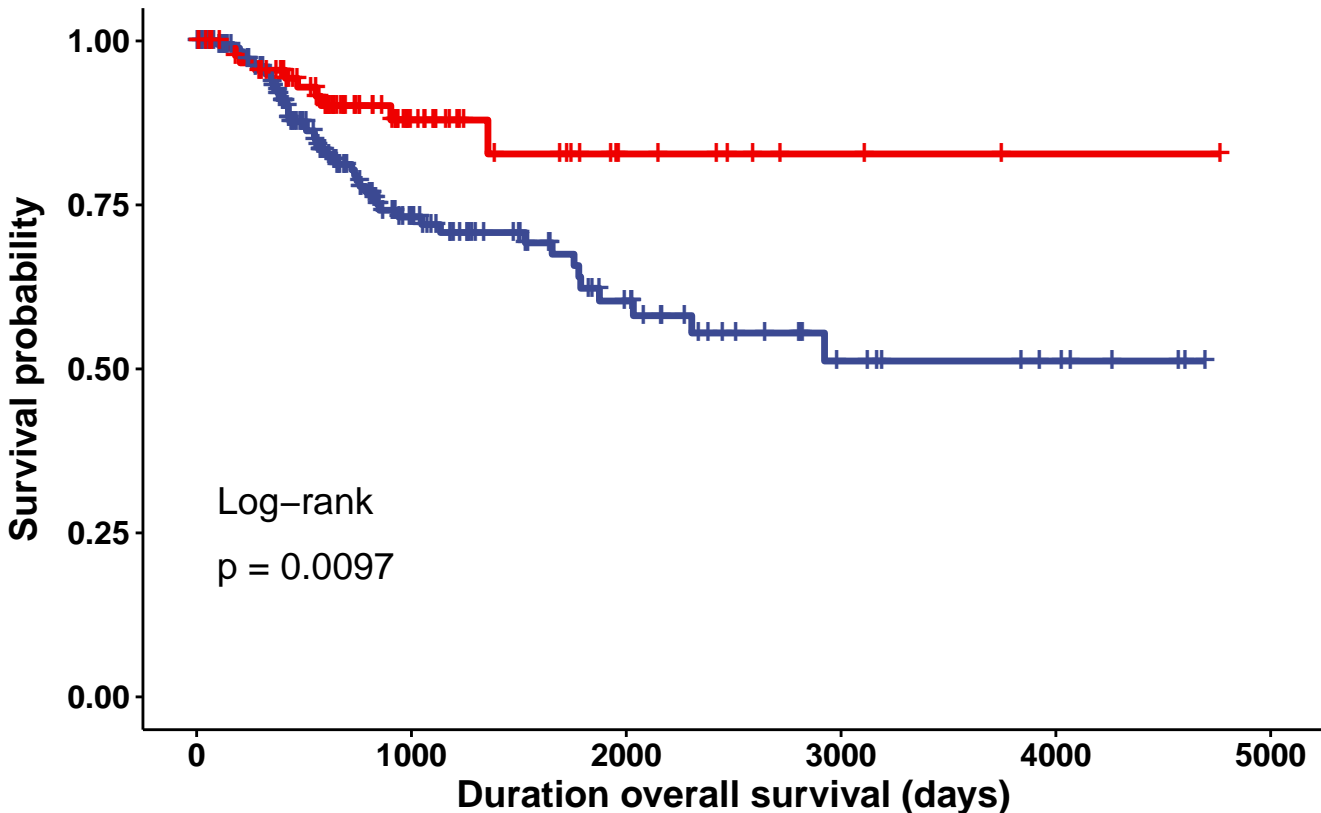

Number at risk

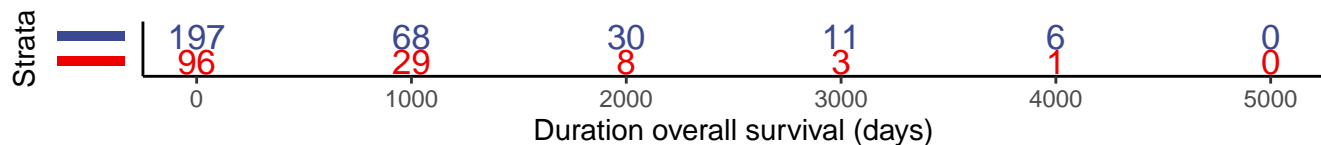

Number of censoring

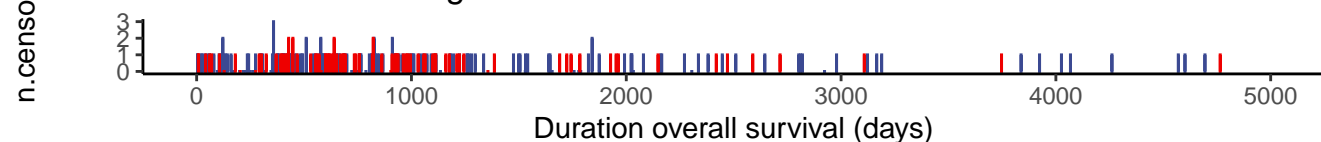

Strata + group=Low + group=High

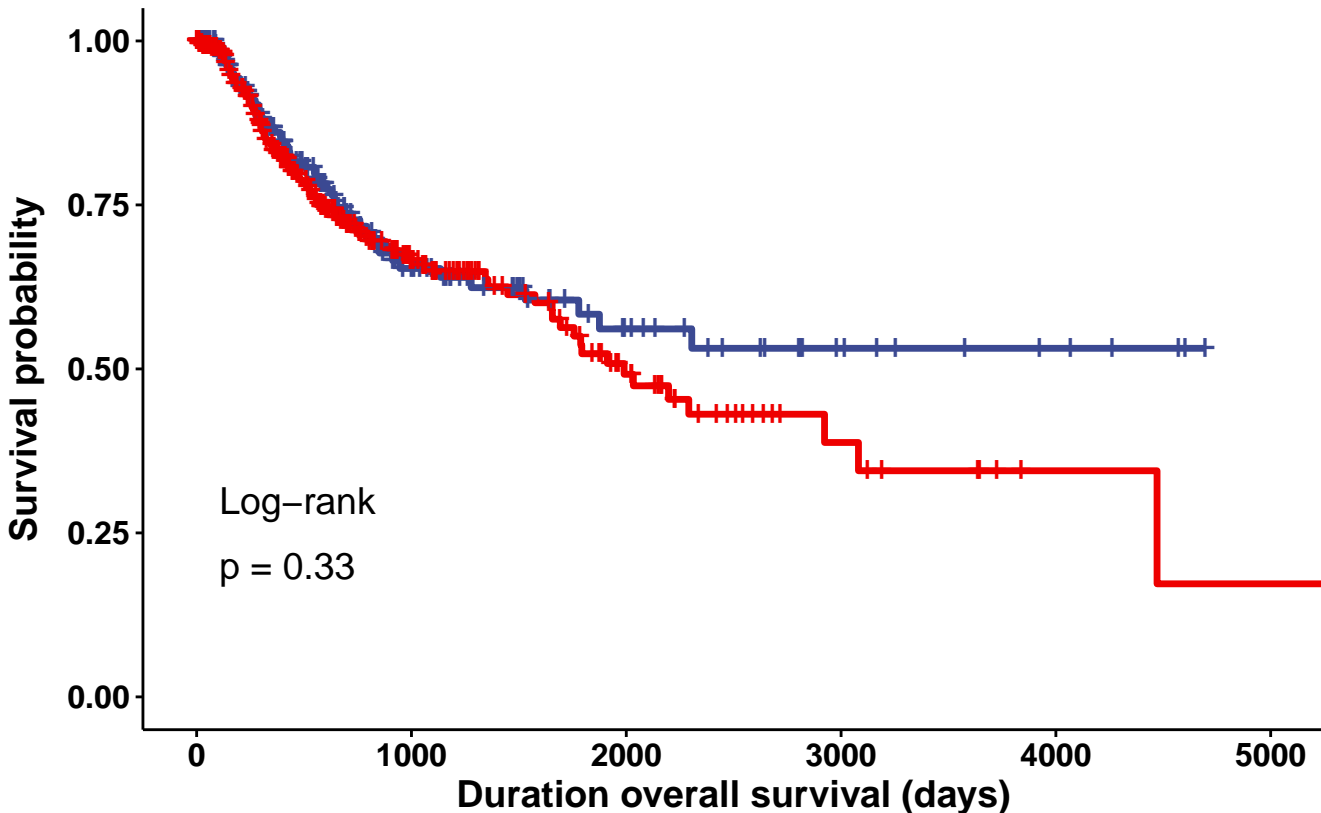

Number at risk

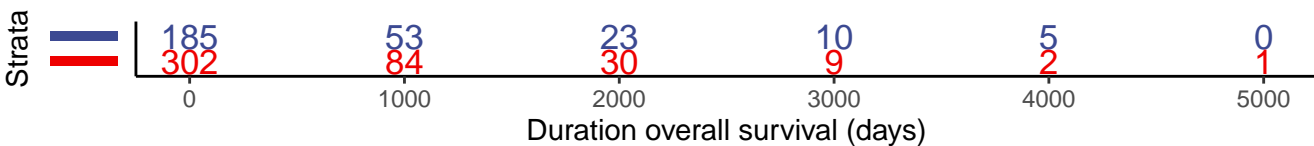

Number of censoring

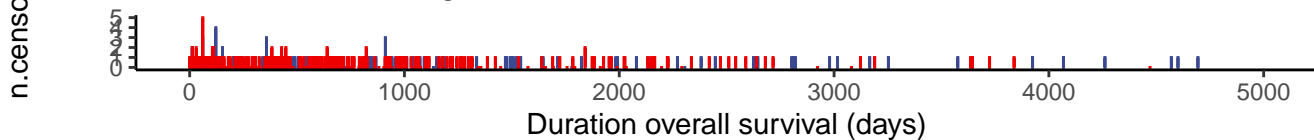

# Landscape\_SNP\_GTEx\_MT\_data

Number of SNPs

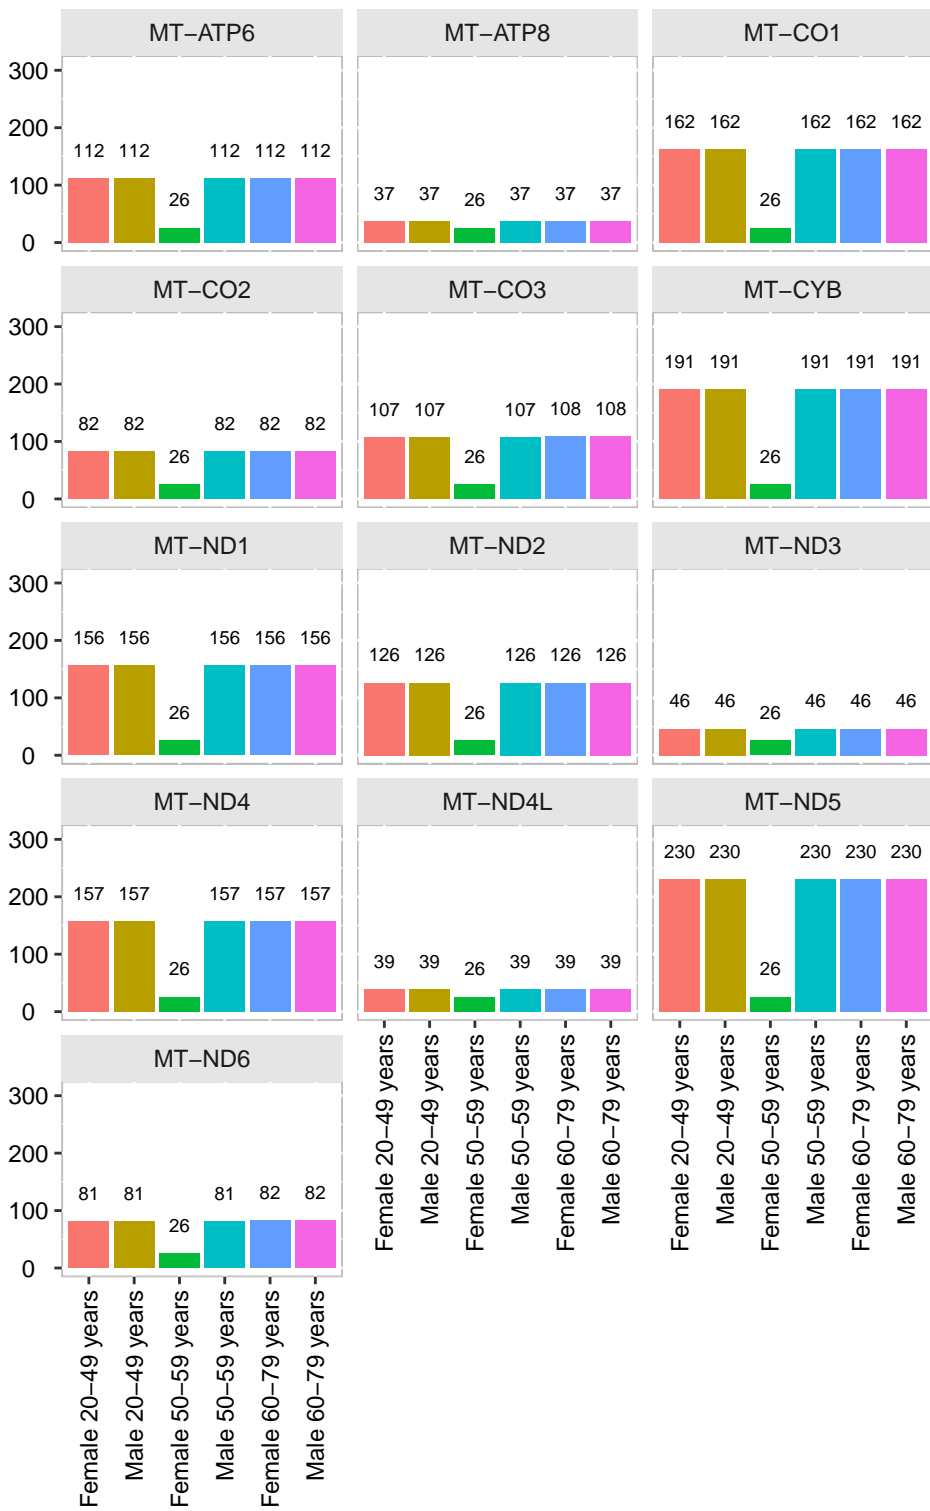



# Landscape\_Tissue\_GTEx\_MT\_data

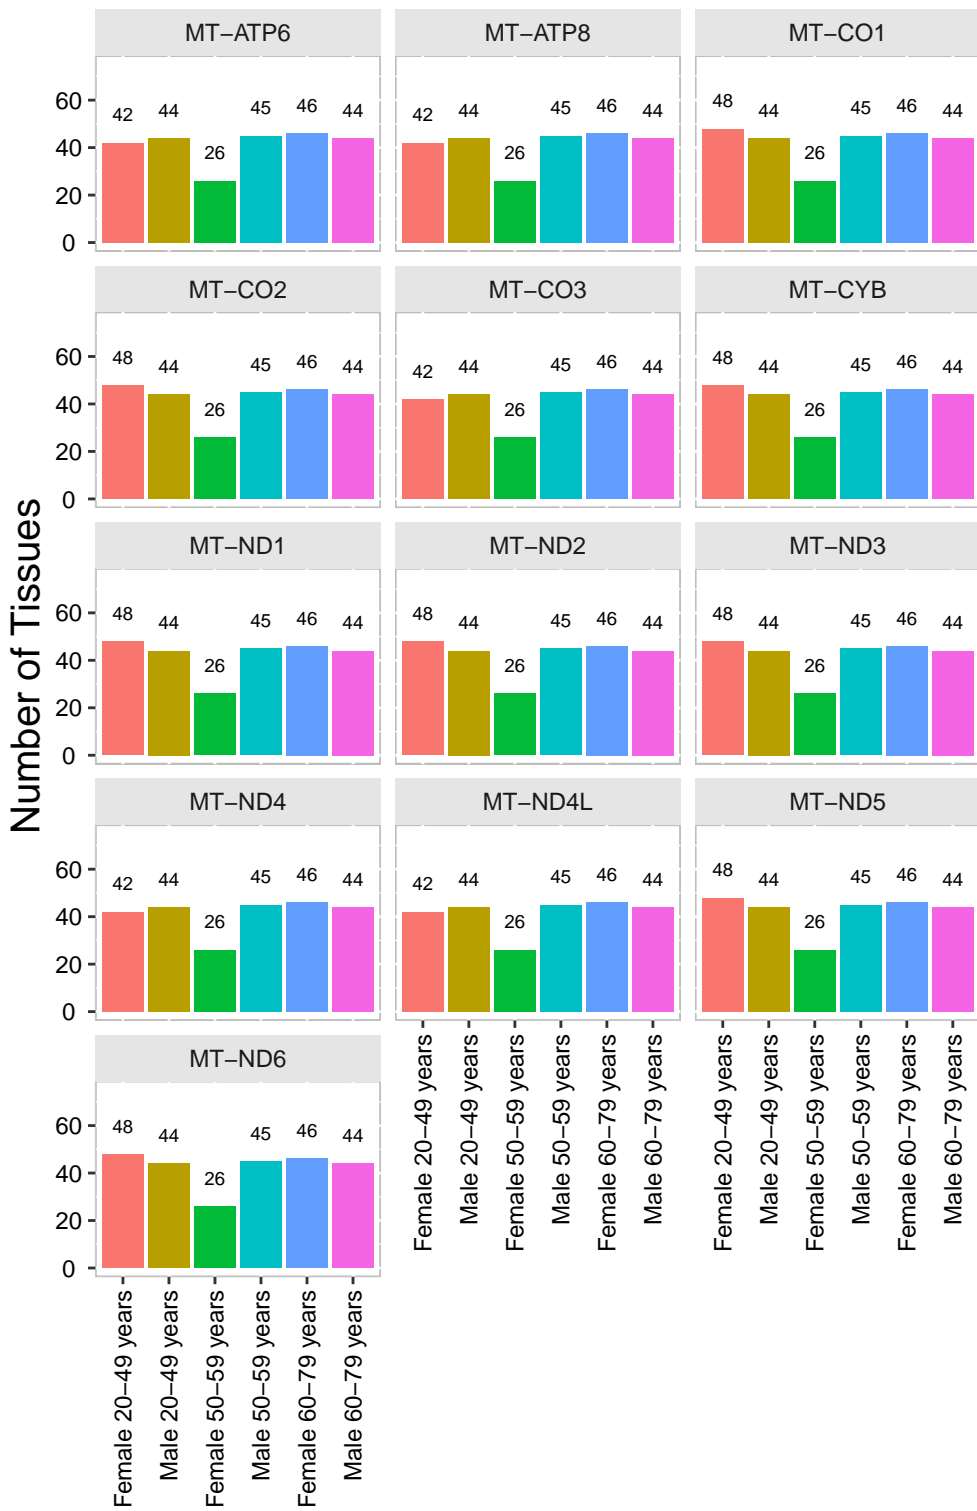

# Landscape\_RPKM\_GTEx\_MT\_data

RPKM mean

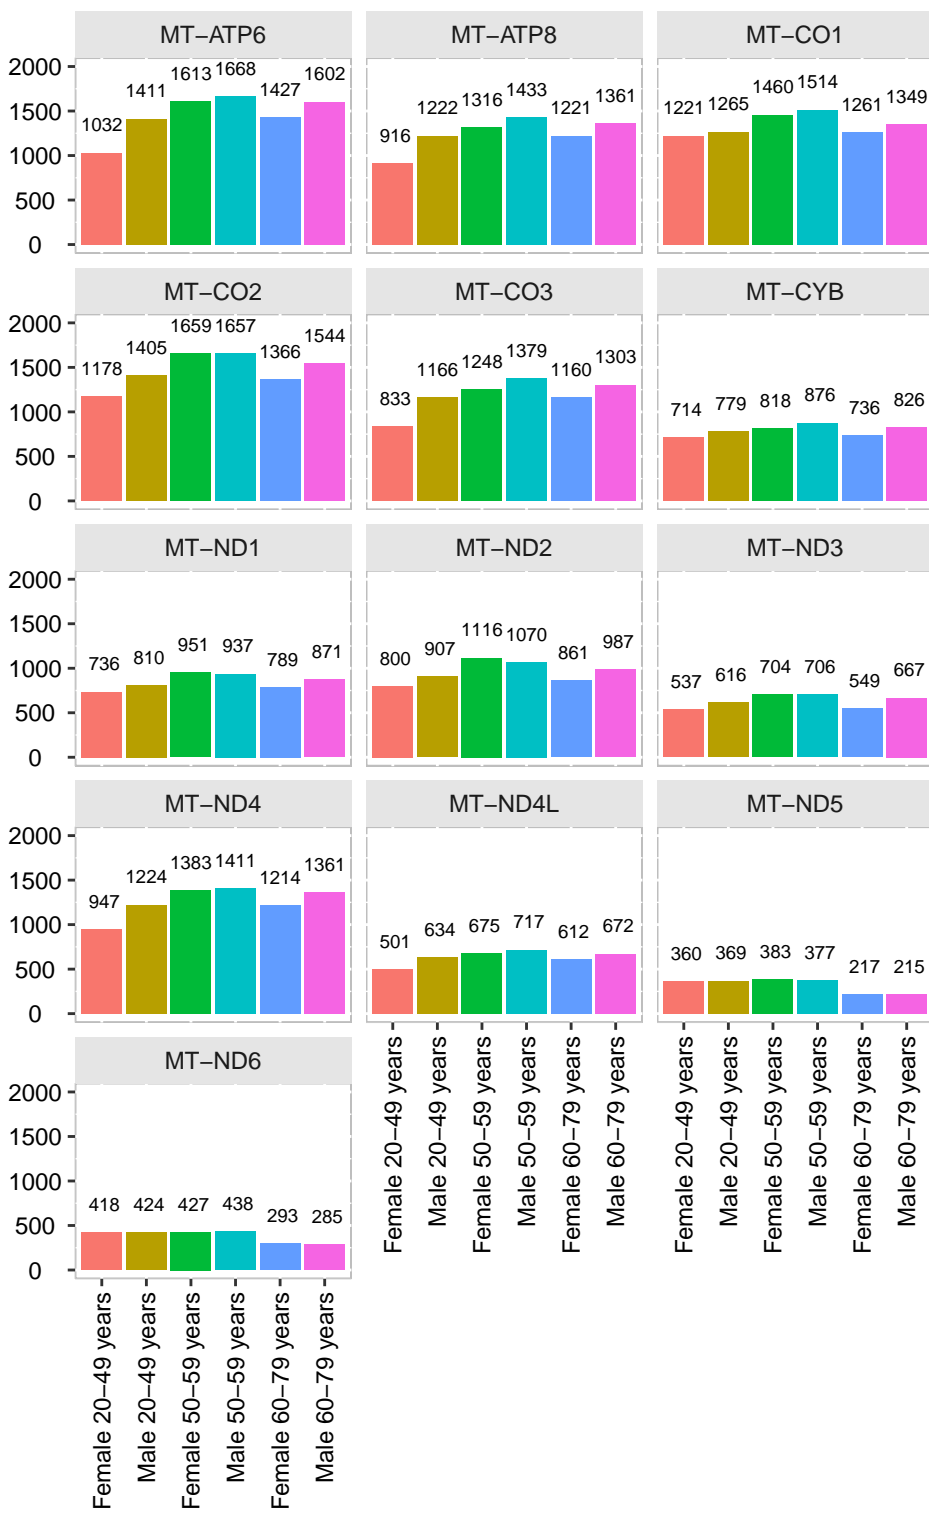

Strata group=Low group=High

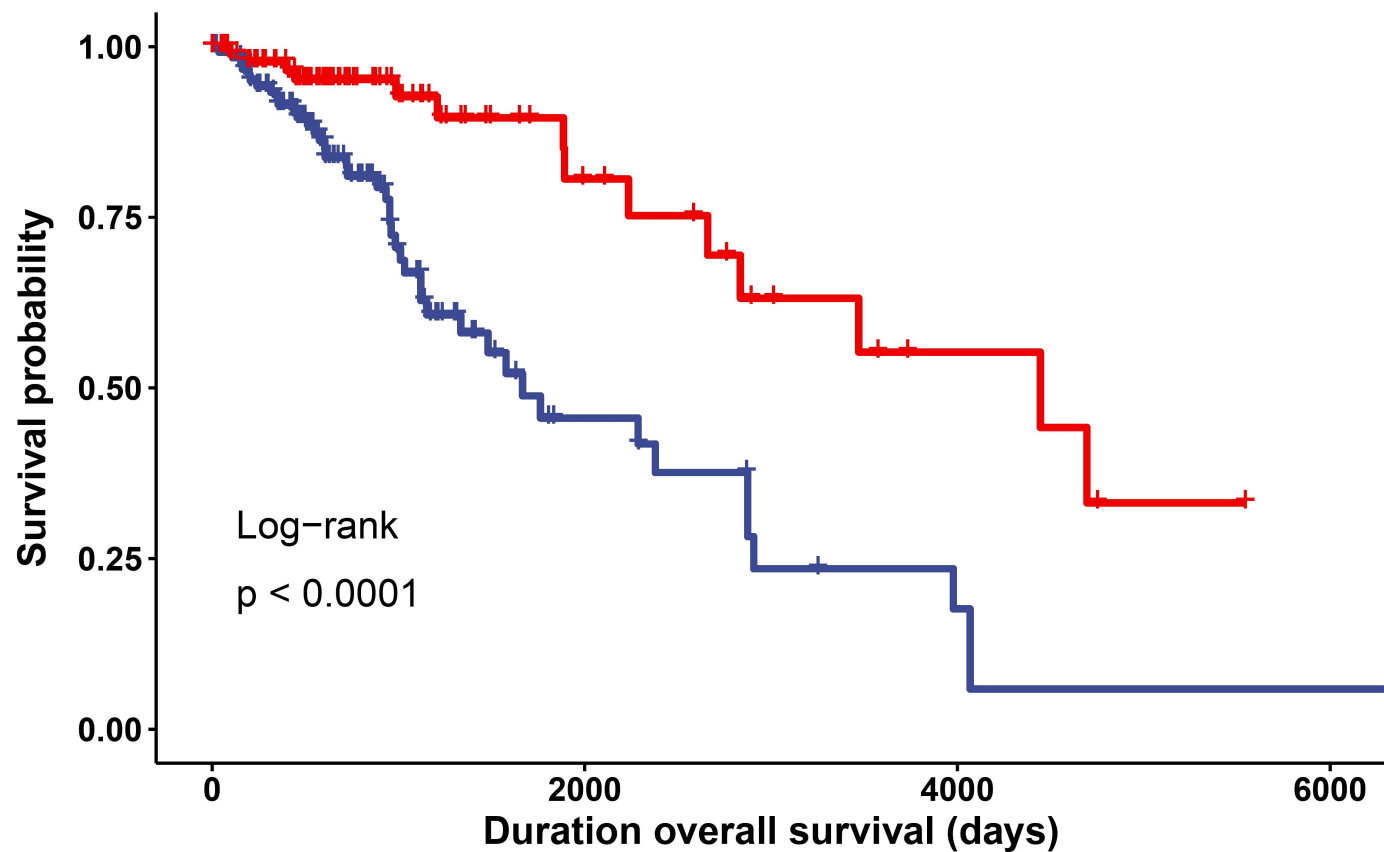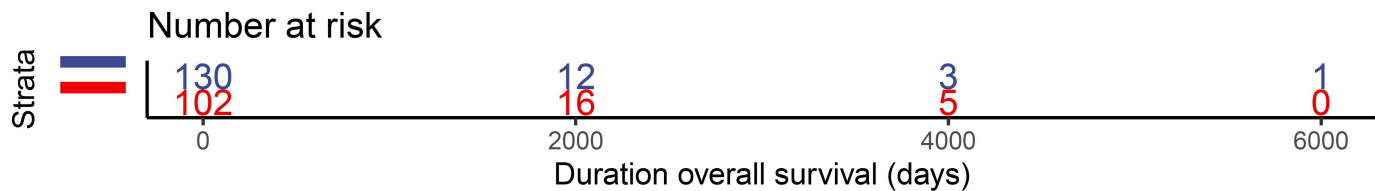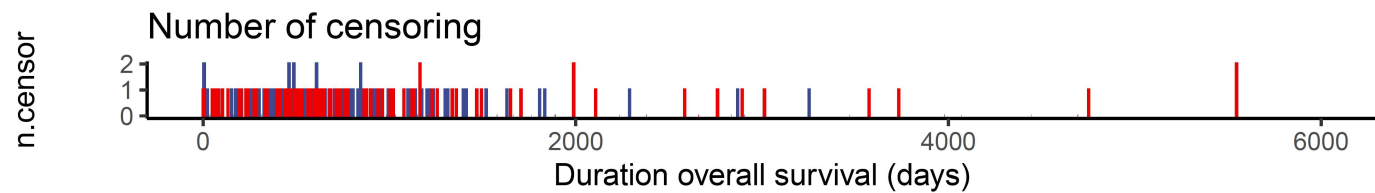

Source: https://www.biorxiv.org/content/10.1101/2022.11.22.517535v1.full.pdf
